# Supplementary material for: Limited inhibition of multiple nodes in a driver network blocks metastasis
Source: eLife journal article supplement (doi:10.7554/elife.59696), 2021-05-11

Figure 2 - figure supplement 1

A.

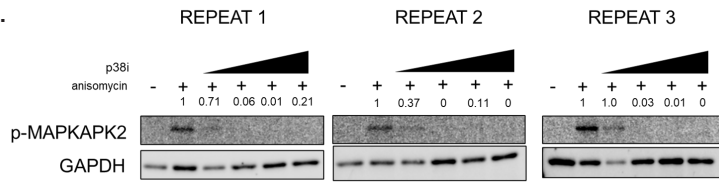

\* Negative values for relative expression were rounded up to 0.

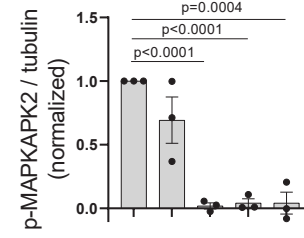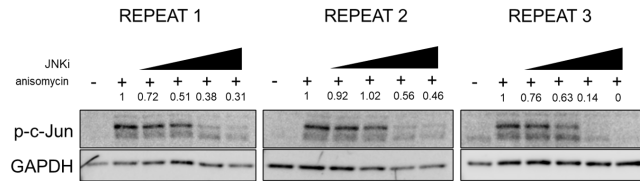

\* Negative values for relative expression were rounded up to 0.

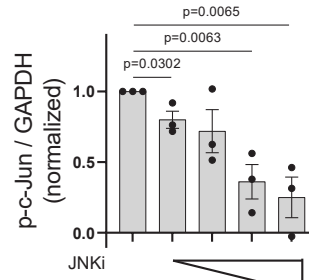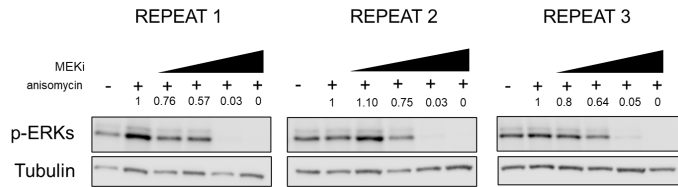

\* Negative values for relative expression were rounded up to 0.

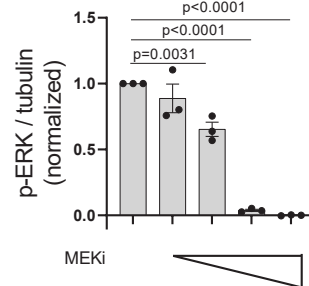

B.

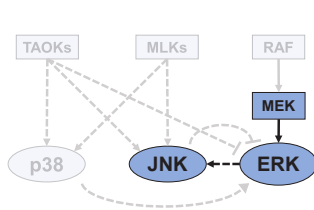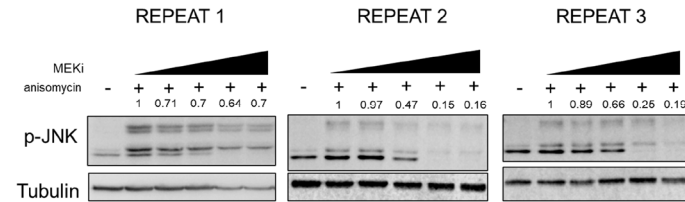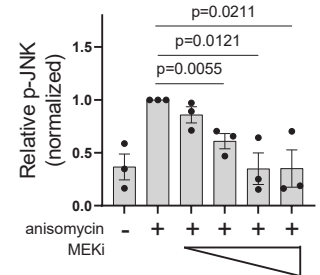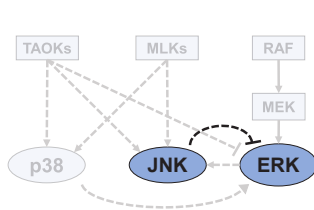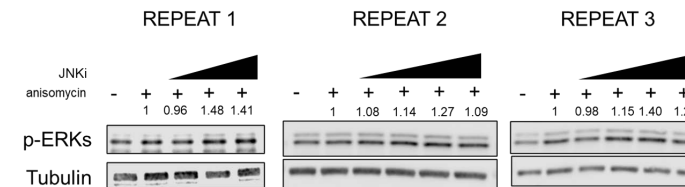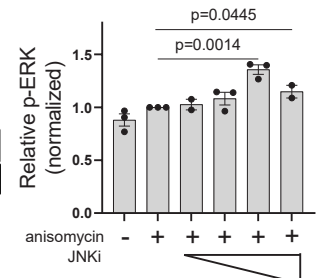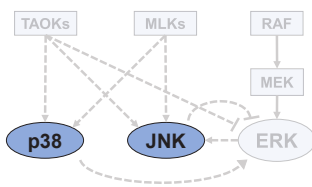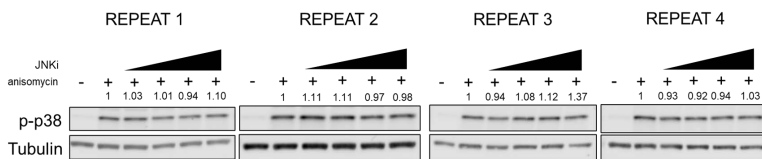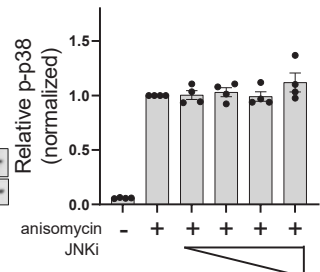

Figure 2 - figure supplement 1 (cont'd)

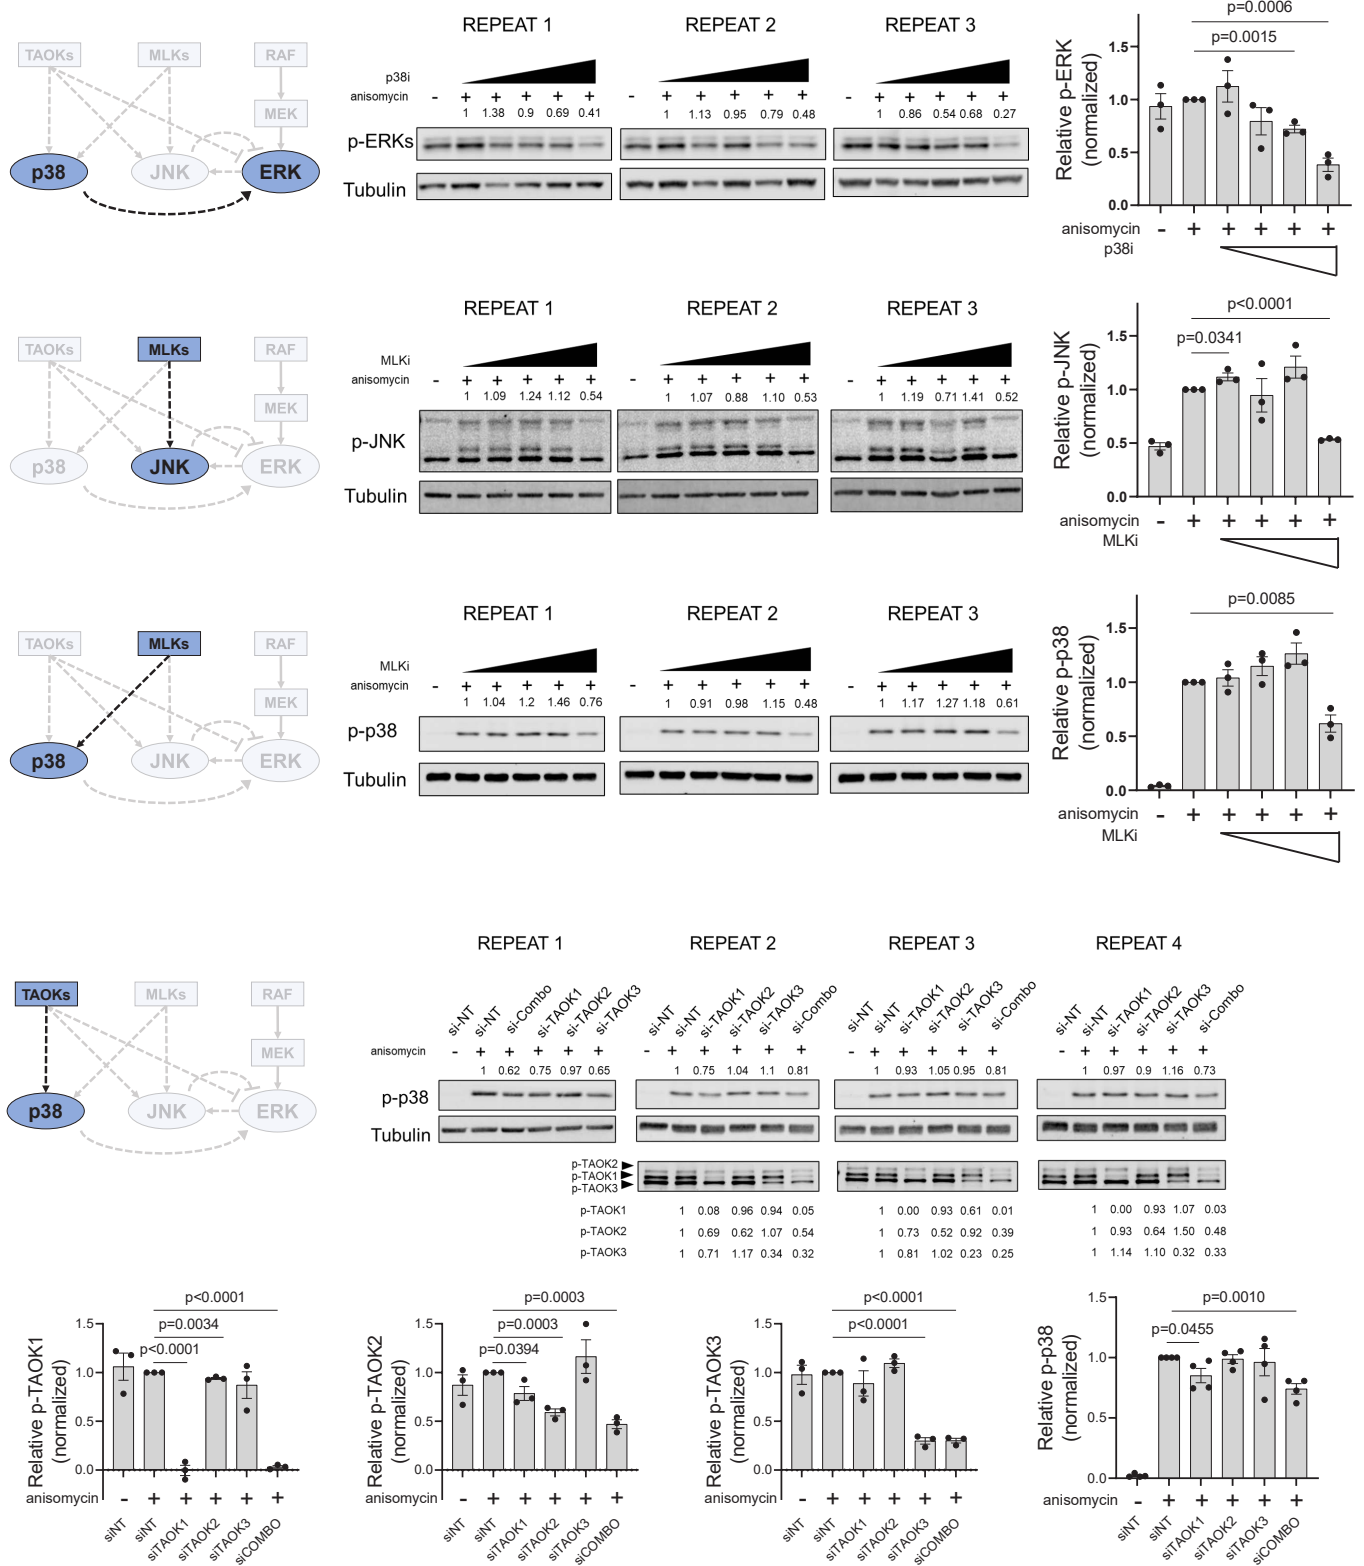

Figure 2 - figure supplement 1 (cont'd)

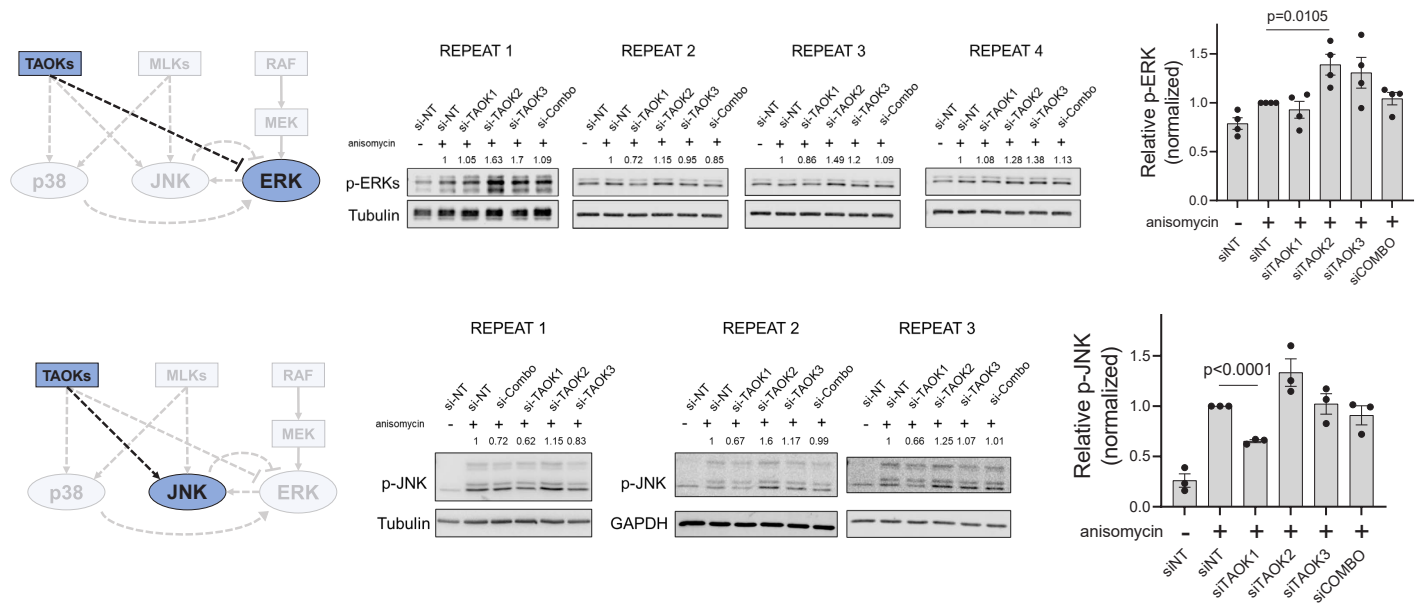

Supplement: supp [file elife-59696-supp-v1.zip]
