# Supplementary material for: Limited inhibition of multiple nodes in a driver network blocks metastasis
Source: eLife. 2021 May 11;10:e59696. doi: 10.7554/eLife.59696 (PMC8128439; doi:10.7554/eLife.59696)
Supplement: Figure 1—source data 1. [file elife-59696-fig1-data1.xlsx]

## Sheet: Figure 1D
	Figure 1D
		sh-CONTROL (n=3 tumors)			sh-BACH1 (n=3 tumors)
	mRNA	tumor1	tumor2	tumor3	tumor4	tumor5	tumor6
	BACH1	1.01362	1.0013	0.985087	0.489056	0.487717	0.485887
	ROCK1	1.04777	1.00165	0.950577	0.764953	0.790876	0.713556
	ROCK2	0.997047	0.945406	1.05755	0.912941	0.973375	0.885878
	DOCK4	1.18507	0.941947	0.872981	0.91198	0.928039	0.864319
	DOCK5	1.18761	0.911381	0.901013	0.736111	0.694433	0.725918
	PIKFYVE	1.1617	0.919223	0.919075	0.769573	0.708373	0.779214
	RAPGEF2	1.01312	0.951858	1.03502	0.995277	0.966422	0.901466
	RAPGEF6	1.08085	0.888094	1.03106	0.774586	0.854077	0.895996

## Sheet: Figure 1E
	Figure 1E
	NRS - Normal Rabbit Serum
	BACH1 - Immunoprecipitation with anti-BACH1 antibody
		RAW DATA
		NRS			BACH1
		ChIP-1	ChIP-2	ChIP-3	ChIP-1	ChIP-2	ChIP-3
	HMOX1	0.00579118	0.015283	0.00967228	0.341054	0.440762	0.524157
	ITGA1	0.0183011	0.0198884	0.0144586	0.149485	0.253151	0.218859
	DOCK4	0.00674518	0.00859714	0.00727958	0.0336808	0.0757858	0.0524858
	RAPGEF2	0.0140632	0.0115023	0.0122428	0.0479632	0.122264	0.0547147
	PIKFYVE	0.0127627	0.0137738	0.0140632	0.0353553	0.0773782	0.0397768
	ROCK2	0.048971	0.0356013	0.0149685	0.0574349	0.139474	0.0687771
	RAPGEF6	0.0269807	0.0312083	0.0257028	0.0444421	0.171713	0.082932
	Negative region	0.000734	5.9699e-05	0.00016086	0.00014598	0.0001543	0.00013433
		RELATIVE ENRICHMENT ( with respect to NRS for each gene)
		NRS			BACH1
		ChIP-1	ChIP-2	ChIP-3	ChIP-1	ChIP-2	ChIP-3
	HMOX1	1	1	1	58.892	28.84	54.1917
	ITGA1	1	1	1	8.1681	12.7286	15.1369
	DOCK4	1	1	1	4.99332	8.81524	7.21
	RAPGEF2	1	1	1	3.41054	10.6295	4.46915
	PIKFYVE	1	1	1	2.77022	5.61778	2.82843
	ROCK2	1	1	1	1.17283	3.91768	4.59479
	RAPGEF6	1	1	1	1.64718	5.50217	3.22657
	Negative region	1	1	1	0.198884	2.58471	0.835088

## Sheet: suppl 1D
	Figure 1 - figure supplement 1D
		BM1 tumors
		VC (Empty vector control)					RKIP S153E
	Gene	Tumor #1	Tumor #2	Tumor #3	Tumor #4	Tumor #5	Tumor #1	Tumor #2	Tumor #3	Tumor #4
	RKIP	6.20286e-06	3.13382e-06	1.07909e-05	8.69373e-06	6.9652e-06	0.941653	0.490651	1.30831	1.25939
	BACH1	1.0845	1.03193	0.848308	1.10112	0.934143	0.683048	0.513134	0.613954	1.03671
	ROCK1	0.975405	1.16608	0.864344	0.961724	1.03245	0.63132	0.751928	0.688662	0.656624
	ROCK2	1.11684	1.0876	0.819337	0.993858	0.982367	0.779407	0.650543	0.701998	0.605043
	DOCK4	1.17885	1.14145	0.862974	0.885069	0.931651	0.603384	0.535851	0.868814	0.560532
	DOCK5	1.1345	1.02378	0.940444	0.897093	1.00418	0.731142	0.704025	1.59254	0.806889
	RAPGEF2	1.10102	1.06518	0.816426	0.979572	1.0378	0.712413	0.90358	0.629619	0.649303
	RAPGEF6	1.0402	1.15904	0.889042	0.964227	0.947491	0.77994	0.793744	0.790553	0.770684
	PIKFYVE	1.32767	1.01934	0.929823	0.763981	0.95919	0.758892	0.766316	0.646586	0.615787
	APC	1.06411	1.10678	0.95675	0.829318	1.04304	0.824064	0.946609	0.902576	0.75132
	ADAM10	0.822279	1.25922	0.966409	0.826808	1.12528	0.5593	0.666978	0.581934	0.540309
	ADAM17	0.895777	1.26948	1.05717	0.737748	1.03982	0.505107	0.682492	0.666792	0.677157
	ITGA1	1.06173	1.13467	0.616135	0.759686	1.42778	0.664411	0.603775	0.610093	0.49664
	NFATC2	1.03734	1.17817	0.991683	0.794287	0.99852	0.958029	0.78715	0.894727	0.762959
	DDR2	1.21611	1.03141	0.655075	0.977456	1.11995	1.25249	1.06269	1.17579	0.953034
	ARL13B	0.96143	1.15649	1.00318	0.807019	1.07188	0.896569	0.714268	0.8276	0.844785

## Sheet: suppl 2D
	Figure 1 - figure supplement 2D
		BM1 tumors
		shCONTROL			shBACH1
	Gene	Tumors #1	Tumors #2	Tumors #3	Tumors #1	Tumors #2	Tumors #3
	BACH1	1.01894	1.09692	0.914111	0.430368	0.259386	0.353922
	ROCK1	0.943039	1.16307	0.916714	0.844315	0.664858	0.664865
	ROCK2	0.934066	1.25555	0.866183	0.864597	0.716981	0.709135
	DOCK4	1.02409	1.07166	0.9312	1.04138	0.845407	0.821754
	DOCK5	1.01882	1.01669	0.968094	0.757448	0.789765	0.690768
	PIKFYVE	0.955211	1.2132	0.888877	0.982097	0.952896	0.778536
	RAPGEF2	1.10775	1.12273	0.844921	0.8629	0.664857	0.604453
	RAPGEF6	1.15671	1.03461	0.842018	0.777064	0.568071	0.546851
	APC	1.16405	1.05603	0.835945	0.782854	0.641938	0.630263
	ADAM10	1.09943	1.06136	0.872833	0.847457	0.927105	0.731885
	ADAM17	0.98857	1.17015	0.872949	0.895362	0.891396	0.774656
	ITGA1	1.01747	1.13402	0.869299	0.85527	0.811093	0.730998
	NFATC2	0.876547	1.31092	0.876723	0.902051	0.915417	0.702847
	DDR2	1.01216	0.973462	1.03346	0.495185	0.629487	0.557044
	ARL13B	0.975096	1.27164	0.809823	0.775796	0.862382	0.778714
