# Supplementary material for: Limited inhibition of multiple nodes in a driver network blocks metastasis
Source: eLife. 2021 May 11;10:e59696. doi: 10.7554/eLife.59696 (PMC8128439; doi:10.7554/eLife.59696)
Supplement: Figure 2—source data 1. [file elife-59696-fig2-data1.xlsx]

## Sheet: Sheet1
Gene	Kinase	Family	LFQ intensity 226_control	LFQ intensity 227_control	LFQ intensity 231_control	LFQ intensity 233_control	LFQ intensity 235_control	LFQ intensity 237_RKIP	LFQ intensity 239_RKIP	LFQ intensity 240_RKIP	LFQ intensity 241_RKIP	LFQ intensity 243_RKIP	LFQ intensity 245_RKIP	Gene	Kinase	Family	AVG Control	AVG RKIP	AVG RKIP/control	ttest	Significant?	Scaled_226_control	Scaled_227_control	Scaled_231_control	Scaled_233_control	Scaled_235_control	Scaled_237_RKIP	Scaled_239_RKIP	Scaled_240_RKIP	Scaled_241_RKIP	Scaled_243_RKIP	Scaled_245_RKIP	ttest_scaled	Significant?	%delta_237_RKIP	%delta_239_RKIP	%delta_240_RKIP	%delta_241_RKIP	%delta_243_RKIP	%delta_245_RKIP
PDXK	PDXK	Metabolic	76075000	55015000	78911000	100720000	64654000	88730000	88207000	96876000	135950000	103120000	140550000	PDXK	PDXK	Metabolic	75075000	108905500	1.45062	0.0254831	yes	1.01332	0.732801	1.0511	1.34159	0.861192	1.18188	1.17492	1.29039	1.81086	1.37356	1.87213	0.0254831	yes	18.1885	17.4918	29.039	81.0856	37.356	87.2128
TTK	TTK	Other	87277000	141040000	144040000	128620000	121390000	169550000	137470000	181750000	182480000	203840000	189990000	TTK	TTK	Other	124473400	1.77513e+08	1.42611	0.00382591	yes	0.70117	1.13309	1.1572	1.03331	0.975228	1.36214	1.10441	1.46015	1.46602	1.63762	1.52635	0.00382591	yes	36.2138	10.4413	46.0151	46.6016	63.7619	52.635
AXL	UFO	TK	1526000000	2083000000	1600200000	1652800000	1362000000	2082900000	1731300000	2243100000	1888800000	2088200000	2073100000	AXL	UFO	TK	1644800000	2017900000	1.22684	0.0222631	yes	0.927772	1.26642	0.972884	1.00486	0.828064	1.26635	1.05259	1.36375	1.14835	1.26958	1.2604	0.0222631	yes	26.6355	5.259	36.3752	14.8346	26.9577	26.0396
PRKG1	KGP1	AGC	1086900000	1314700000	1157500000	1390700000	1094200000	1180000000	1391900000	1544200000	1338500000	1706400000	1725000000	PRKG1	KGP1	AGC	1208800000	1481000000	1.22518	0.038012	yes	0.899156	1.08761	0.957561	1.15048	0.905195	0.976175	1.15147	1.27747	1.1073	1.41165	1.42704	0.038012	yes	-2.38253	15.1473	27.7465	10.7296	41.1648	42.7035
EPHA2	EPHA2	TK	27237000000	31441000000	29981000000	27104000000	29615000000	33368000000	32046000000	36664000000	32255000000	32265000000	38827000000	EPHA2	EPHA2	TK	29075600000	34237500000	1.17753	0.00704458	yes	0.936765	1.08135	1.03114	0.932191	1.01855	1.14763	1.10216	1.26099	1.10935	1.10969	1.33538	0.00704458	yes	14.7629	10.2161	26.0989	10.9349	10.9693	33.5381
PLK4	PLK4	Other	149360000	169330000	193420000	157710000	187460000	198510000	196550000	213830000	211840000	176200000	186270000	PLK4	PLK4	Other	171456000	197200000	1.15015	0.0304668	yes	0.871127	0.9876	1.1281	0.919828	1.09334	1.15779	1.14636	1.24714	1.23554	1.02767	1.0864	0.0304668	yes	15.779	14.6358	24.7142	23.5536	2.76689	8.64012
CHKB	CHKB	Metabolic	144800000	134570000	159480000	146020000	155430000	156180000	154950000	158280000	182350000	184260000	160150000	CHKB	CHKB	Metabolic	148060000	1.66028e+08	1.12136	0.0353293	yes	0.977982	0.908888	1.07713	0.986222	1.04978	1.05484	1.04654	1.06903	1.2316	1.2445	1.08166	0.0353293	yes	5.48426	4.65352	6.90261	23.1595	24.4495	8.16561
FN3KRP	KT3K	Metabolic	6772200000	7188800000	7828100000	6552300000	7279200000	7142800000	5380800000	6586300000	5986100000	6551900000	6481000000	FN3KRP	KT3K	Metabolic	7124120000	6.35482e+09	0.892014	0.0483721	yes	0.950602	1.00908	1.09882	0.919735	1.02177	1.00262	0.755293	0.924507	0.840258	0.919679	0.909726	0.0483721	yes	0.262208	-24.4707	-7.54928	-15.9742	-8.03215	-9.02736
TAOK2	TAOK2	STE	334080000	325260000	313420000	335180000	326550000	248610000	285040000	309600000	263120000	300640000	334800000	TAOK2	TAOK2	STE	326898000	2.90302e+08	0.88805	0.0339807	yes	1.02197	0.994989	0.95877	1.02534	0.998935	0.760512	0.871954	0.947084	0.804899	0.919675	1.02417	0.0339807	yes	-23.9488	-12.8046	-5.29156	-19.5101	-8.03247	2.41727
MAP3K11	M3K11	STE	576090000	458250000	504990000	551510000	504270000	437470000	400260000	503130000	431630000	519860000	406720000	MAP3K11	M3K11	STE	519022000	449845000	0.866717	0.0421139	yes	1.10995	0.882911	0.972965	1.06259	0.971577	0.842874	0.771181	0.969381	0.831622	1.00161	0.783628	0.0421139	yes	-15.7126	-22.8819	-3.06191	-16.8378	0.161458	-21.6372
PIKFYVE	FYV1	Metabolic	134660000	140800000	124000000	134450000	120960000	104580000	99253000	113560000	122680000	106790000	133200000	PIKFYVE	FYV1	Metabolic	130974000	1.13344e+08	0.865392	0.0256608	yes	1.02814	1.07502	0.946753	1.02654	0.923542	0.798479	0.757807	0.867042	0.936674	0.815353	1.017	0.0256608	yes	-20.1521	-24.2193	-13.2958	-6.33255	-18.4647	1.69957
MAPK9	MK09	CMGC	4833400000	4775000000	4879800000	6165500000	5312800000	4644800000	4641200000	4818100000	4112300000	4117000000	4276400000	MAPK9	MK09	CMGC	5193300000	4.43497e+09	0.853979	0.0213882	yes	0.930699	0.919454	0.939634	1.1872	1.02301	0.894383	0.89369	0.927753	0.791847	0.792752	0.823446	0.0213882	yes	-10.5617	-10.631	-7.22469	-20.8153	-20.7248	-17.6554
MAPK1	MK01	CMGC	39026000000	35379000000	38466000000	40395000000	40847000000	35851000000	31810000000	31464000000	28274000000	34429000000	33178000000	MAPK1	MK01	CMGC	38822600000	32501000000	0.837167	0.00203418	yes	1.00524	0.911299	0.990815	1.0405	1.05214	0.923457	0.819368	0.810456	0.728287	0.886829	0.854605	0.00203418	yes	-7.6543	-18.0632	-18.9544	-27.1713	-11.3171	-14.5395
IRAK1	IRAK1	TKL	45413000	58483000	66253000	65336000	63167000	48531000	42540000	56463000	37637000	54379000	51541000	IRAK1	IRAK1	TKL	59730400	4.85152e+07	0.812236	0.0424147	yes	0.7603	0.979116	1.1092	1.09385	1.05754	0.812501	0.7122	0.945298	0.630115	0.910407	0.862894	0.0424147	yes	-18.7499	-28.78	-5.47025	-36.9885	-8.95926	-13.7106
EIF2AK4	E2AK4	Other	323070000	442870000	430850000	292220000	359280000	265180000	278450000	324490000	289610000	295020000	338960000	EIF2AK4	E2AK4	Other	369658000	2.98618e+08	0.807823	0.0391312	yes	0.87397	1.19805	1.16554	0.790514	0.971925	0.717366	0.753264	0.877811	0.783454	0.798089	0.916956	0.0391312	yes	-28.2634	-24.6736	-12.2189	-21.6546	-20.1911	-8.30443
RPS6KA3	KS6A3	AGC	10479000000	9754300000	9353300000	12594000000	10935000000	8894700000	7636800000	9760800000	7910500000	8706300000	8503100000	RPS6KA3	KS6A3	AGC	10623120000	8568700000	0.806609	0.00850079	yes	0.986433	0.918214	0.880466	1.18553	1.02936	0.837296	0.718885	0.918826	0.744649	0.819561	0.800433	0.00850079	yes	-16.2704	-28.1115	-8.11739	-25.5351	-18.0439	-19.9567
RPS6KA5	KS6A5	AGC	219360000	346140000	283570000	215720000	273840000	203710000	233160000	204510000	211270000	216120000	224130000	RPS6KA5	KS6A5	AGC	267726000	2.15483e+08	0.804865	0.0434066	yes	0.819345	1.29289	1.05918	0.805749	1.02284	0.76089	0.87089	0.763878	0.789128	0.807243	0.837162	0.0434066	yes	-23.911	-12.911	-23.6122	-21.0872	-19.2757	-16.2838
ERN1	ERN1	Other	30953000	34841000	42978000	38228000	47877000	30072000	31277000	33655000	26273000	37328000	27884000	ERN1	ERN1	Other	38975400	31081500	0.797465	0.0374836	yes	0.794168	0.893923	1.1027	0.980824	1.22839	0.771564	0.802481	0.863493	0.674092	0.957732	0.715426	0.0374836	yes	-22.8436	-19.7519	-13.6507	-32.5908	-4.22677	-28.4574
MAPK8	MK08	CMGC	1976000000	1595700000	1740100000	1703300000	2160700000	1497700000	1410000000	1629800000	935280000	1343300000	1819500000	MAPK8	MK08	CMGC	1835160000	1.43926e+09	0.784271	0.0387312	yes	1.07675	0.869515	0.948201	0.928148	1.17739	0.816114	0.768325	0.888097	0.509645	0.73198	0.991467	0.0387312	yes	-18.3886	-23.1675	-11.1903	-49.0355	-26.802	-0.853332
MAPK14	MK14	CMGC	16294000000	13795000000	13172000000	18281000000	14058000000	12976000000	12185000000	11178000000	10690000000	11636000000	12394000000	MAPK14	MK14	CMGC	15120000000	1.18432e+10	0.783278	0.00676831	yes	1.07765	0.912368	0.871164	1.20906	0.929762	0.858201	0.805886	0.739286	0.707011	0.769577	0.819709	0.00676831	yes	-14.1799	-19.4114	-26.0714	-29.2989	-23.0423	-18.0291
STK11	STK11	CAMK	184580000	231410000	167210000	197780000	192620000	177480000	157280000	123490000	147130000	132080000	119110000	STK11	STK11	CAMK	194720000	1.42762e+08	0.733164	0.00451988	yes	0.947925	1.18842	0.85872	1.01571	0.989215	0.911463	0.807724	0.634193	0.755598	0.678307	0.611699	0.00451988	yes	-8.85374	-19.2276	-36.5807	-24.4402	-32.1693	-38.8301
PTK2B	FAK2	TK	3123900000	3164500000	3423000000	4464300000	3220800000	2654500000	2140400000	2313200000	2399300000	2848400000	2709900000	PTK2B	FAK2	TK	3479300000	2510950000	0.721683	0.00448933	yes	0.897853	0.909522	0.983819	1.2831	0.925703	0.762941	0.615181	0.664846	0.689593	0.81867	0.778864	0.00448933	yes	-23.7059	-38.4819	-33.5154	-31.0407	-18.133	-22.1136
HCK	HCK	TK	2492200000	2398500000	2231800000	4300800000	2919200000	2065200000	1885800000	1685900000	1908500000	2433400000	2293900000	HCK	HCK	TK	2868500000	2045450000	0.713073	0.0488324	yes	0.868816	0.836151	0.778037	1.49932	1.01767	0.719958	0.657417	0.587729	0.66533	0.848318	0.799686	0.0488324	yes	-28.0042	-34.2583	-41.2271	-33.467	-15.1682	-20.0314
AGK	AGK	Metabolic	74622000	94176000	102890000	103600000	103240000	78490000	70064000	67038000	68400000	63428000	55353000	AGK	AGK	Metabolic	95705600	6.71288e+07	0.70141	0.0011277	yes	0.779704	0.984018	1.07507	1.08249	1.07872	0.820119	0.732078	0.700461	0.714692	0.662741	0.578367	0.0011277	yes	-17.9881	-26.7922	-29.9539	-28.5308	-33.7259	-42.1633
JAK3	JAK3	TK	20809000	17374000	26063000	31079000	22619000	11908000	11504000	20354000	12078000	19496000	22224000	JAK3	JAK3	TK	23588800	1.62607e+07	0.689338	0.0407661	yes	0.882156	0.736536	1.10489	1.31753	0.958887	0.504816	0.487689	0.862867	0.512023	0.826494	0.942142	0.0407661	yes	-49.5184	-51.2311	-13.7133	-48.7977	-17.3506	-5.7858
RPS6KB1	KS6B1	AGC	347700000	445610000	415470000	337370000	448220000	294150000	246050000	279620000	258370000	292120000	246660000	RPS6KB1	KS6B1	AGC	398874000	269495000	0.675639	0.00039339	yes	0.871704	1.11717	1.04161	0.845806	1.12371	0.737451	0.616861	0.701023	0.647748	0.732362	0.618391	0.00039339	yes	-26.2549	-38.3139	-29.8977	-35.2252	-26.7638	-38.1609
MLTK	MLTK	STE	809340000	858440000	934660000	656680000	760660000	417530000	545980000	629010000	501120000	530300000	612220000	MLTK	MLTK	STE	803956000	539360000	0.670882	0.00092374	yes	1.0067	1.06777	1.16258	0.816811	0.946146	0.519344	0.679117	0.782394	0.623318	0.659613	0.761509	0.00092374	yes	-48.0656	-32.0883	-21.7606	-37.6682	-34.0387	-23.8491
MAP3K9	M3K9	STE	33191000	38209000	24358000	47920000	35811000	18402000	30275000	24099000	18957000	21818000	27153000	MAP3K9	M3K9	STE	35897800	2.34507e+07	0.653262	0.0130219	yes	0.924597	1.06438	0.678537	1.3349	0.997582	0.512622	0.843366	0.671322	0.528083	0.607781	0.756397	0.0130219	yes	-48.7378	-15.6634	-32.8678	-47.1917	-39.2219	-24.3603
BTK	BTK	TK	2914800000	2771400000	2750600000	5355200000	3797300000	2111700000	2189000000	2522000000	1888100000	2507200000	2342700000	BTK	BTK	TK	3517860000	2.26012e+09	0.642469	0.0237795	yes	0.828572	0.787808	0.781896	1.52229	1.07943	0.60028	0.622253	0.716913	0.536718	0.712706	0.665945	0.0237795	yes	-39.972	-37.7747	-28.3087	-46.3282	-28.7294	-33.4055
SGK3	SGK3	AGC	32197000	37024000	32721000	40795000	34983000	24825000	25118000	17988000	19268000	29845000	17754000	SGK3	SGK3	AGC	35544000	2.24663e+07	0.632071	0.000752019	yes	0.905835	1.04164	0.920577	1.14773	0.984217	0.69843	0.706673	0.506077	0.542089	0.839664	0.499494	0.000752019	yes	-30.157	-29.3327	-49.3923	-45.7911	-16.0336	-50.0506
CSNK1A1	KC1A	CK1	81118000	167630000	144690000	78415000	158140000	121910000	383440000	153160000	164120000	105750000	319120000	CSNK1A1	KC1A	CK1	125998600	2.07917e+08	1.65015	0.168148	no	0.643801	1.33041	1.14835	0.622348	1.25509	0.96755	3.04321	1.21557	1.30255	0.839295	2.53273	0.168148	no
FLT4	VGFR3	TK	55862000	35164000	30145000	21804000	15216000	18942000	34675000	115950000	35872000	32655000	64751000	FLT4	VGFR3	TK	31638200	5.04742e+07	1.59536	0.301024	no	1.76565	1.11144	0.952804	0.689167	0.480938	0.598707	1.09599	3.66487	1.13382	1.03214	2.04661	0.301024	no
NEK7	NEK7	NEK	38700000	29966000	23493000	31344000	20710000	42916000	31905000	16244000	15904000	60077000	52029000	NEK7	NEK7	NEK	28842600	36512500	1.26592	0.405189	no	1.34177	1.03895	0.814524	1.08673	0.718035	1.48794	1.10618	0.563195	0.551407	2.08293	1.80389	0.405189	no		Legend
CDK8	CDK8	CMGC	67165000	63610000	71737000	65024000	39818000	59543000	63600000	105580000	68433000	74127000	88758000	CDK8	CDK8	CMGC	61470800	76673500	1.24732	0.138275	no	1.09263	1.0348	1.16701	1.0578	0.647755	0.968639	1.03464	1.71756	1.11326	1.20589	1.44391	0.138275	no		FIGURE 2A values
CAMK4	KCC4	CAMK	31756000	31377000	37785000	43827000	31718000	42472000	33032000	37208000	37741000	47602000	56379000	CAMK4	KCC4	CAMK	35292600	4.24057e+07	1.20155	0.141659	no	0.899792	0.889053	1.07062	1.24182	0.898715	1.20343	0.935947	1.05427	1.06937	1.34878	1.59747	0.141659	no		FIGURE 3B values
PDGFRB	PGFRB	TK	31446000	27835000	43463000	42294000	28858000	34297000	38621000	53016000	45685000	36434000	42675000	PDGFRB	PGFRB	TK	34779200	41788000	1.20152	0.141085	no	0.904161	0.800335	1.24968	1.21607	0.829749	0.986135	1.11046	1.52436	1.31357	1.04758	1.22703	0.141085	no
TLK1	TLK1	Other	72086000	77687000	66537000	72474000	82908000	80824000	73901000	83943000	70912000	96476000	126380000	TLK1	TLK1	Other	74338400	8.87393e+07	1.19372	0.167174	no	0.969701	1.04505	0.895056	0.97492	1.11528	1.08724	0.994116	1.1292	0.953908	1.29779	1.70006	0.167174	no
CHEK1	CHK1	CAMK	571230000	367560000	420880000	315750000	238210000	364200000	388260000	605730000	317980000	405330000	636720000	CHEK1	CHK1	CAMK	382726000	4.53037e+08	1.18371	0.395235	no	1.49253	0.960374	1.09969	0.825003	0.622403	0.951595	1.01446	1.58267	0.830829	1.05906	1.66364	0.395235	no
CDK12	CDK12	CMGC	182970000	136360000	115590000	107070000	121590000	130630000	131830000	184740000	152440000	117790000	224320000	CDK12	CDK12	CMGC	132716000	1.56958e+08	1.18266	0.297596	no	1.37866	1.02746	0.870958	0.80676	0.916167	0.984282	0.993324	1.39199	1.14862	0.887534	1.69023	0.297596	no
CDK2	CDK2	CMGC	6306000000	5584900000	3336700000	4937300000	3720600000	6953500000	5588500000	5892500000	5076900000	4294200000	5973500000	CDK2	CDK2	CMGC	4777100000	5629850000	1.17851	0.219282	no	1.32005	1.1691	0.698478	1.03353	0.778841	1.45559	1.16985	1.23349	1.06276	0.898914	1.25044	0.219282	no
TAOK3	TAOK3	STE	1006500000	818360000	996240000	1016100000	825600000	978870000	929300000	966420000	1030200000	1093900000	1574600000	TAOK3	TAOK3	STE	932560000	1.09555e+09	1.17478	0.195024	no	1.07929	0.877541	1.06829	1.08958	0.885305	1.04966	0.996504	1.03631	1.1047	1.17301	1.68847	0.195024	no
PRKCA	KPCA	AGC	1046700000	995810000	791140000	1045400000	836880000	1084800000	1006500000	910280000	968080000	1188100000	1424900000	PRKCA	KPCA	AGC	943186000	1097110000	1.1632	0.149367	no	1.10975	1.05579	0.838795	1.10837	0.887291	1.15014	1.06713	0.965112	1.02639	1.25967	1.51073	0.149367	no
EGFR	EGFR	TK	6730700000	11175000000	12134000000	7764500000	8337900000	10600000000	8851500000	12728000000	11340000000	10510000000	9999900000	EGFR	EGFR	TK	9228420000	1.06716e+10	1.15638	0.223274	no	0.729345	1.21093	1.31485	0.841368	0.903502	1.14863	0.959157	1.37922	1.22881	1.13887	1.0836	0.223274	no
EPHA3	EPHA3	TK	16380000	17164000	17424000	19652000	11802000	10474000	17754000	28049000	18613000	14106000	25359000	EPHA3	EPHA3	TK	16484400	1.90592e+07	1.15619	0.444059	no	0.993667	1.04123	1.057	1.19216	0.71595	0.635389	1.07702	1.70155	1.12913	0.855718	1.53836	0.444059	no
CDK5	CDK5	CMGC	6461000000	5610800000	6211300000	7492500000	5569900000	9268400000	6335100000	7296800000	6605900000	6983000000	6703100000	CDK5	CDK5	CMGC	6269100000	7.19872e+09	1.14829	0.140963	no	1.03061	0.894993	0.99078	1.19515	0.888469	1.47843	1.01053	1.16393	1.05372	1.11388	1.06923	0.140963	no
MARK1	MARK1	CAMK	149450000	88176000	122200000	97976000	105490000	103490000	90336000	162740000	144820000	112060000	160930000	MARK1	MARK1	CAMK	112658400	1.29063e+08	1.14561	0.361646	no	1.32658	0.782685	1.08469	0.869673	0.93637	0.918618	0.801858	1.44454	1.28548	0.994688	1.42848	0.361646	no
BMPR2	BMPR2	TKL	449990000	515790000	538410000	548660000	401480000	536140000	486040000	569380000	533340000	606060000	606910000	BMPR2	BMPR2	TKL	490866000	5.56312e+08	1.13333	0.0797387	no	0.916727	1.05078	1.09686	1.11774	0.817901	1.09223	0.990168	1.15995	1.08653	1.23468	1.23641	0.0797387	no
BUB1	BUB1	Other	136970000	167160000	180880000	105470000	134250000	164180000	155450000	140460000	175860000	164030000	181650000	BUB1	BUB1	Other	144946000	163605000	1.12873	0.205989	no	0.944973	1.15326	1.24791	0.72765	0.926207	1.1327	1.07247	0.969051	1.21328	1.13166	1.25323	0.205989	no
MAP3K6	M3K6	STE	92324000	101070000	93119000	89300000	81224000	81201000	89629000	143290000	80937000	99409000	123610000	MAP3K6	M3K6	STE	91407400	1.03013e+08	1.12696	0.350342	no	1.01003	1.10571	1.01872	0.976945	0.888593	0.888342	0.980544	1.5676	0.885453	1.08754	1.3523	0.350342	no
STK33	STK33	CAMK	339800000	446920000	463490000	280790000	380510000	456930000	351080000	578070000	333160000	394780000	460830000	STK33	STK33	CAMK	382302000	4.29142e+08	1.12252	0.380493	no	0.888826	1.16902	1.21237	0.734472	0.995313	1.19521	0.918332	1.51208	0.871458	1.03264	1.20541	0.380493	no
MERTK	MERTK	TK	111350000	145570000	139580000	145020000	124560000	144160000	131530000	178290000	128070000	151450000	160760000	MERTK	MERTK	TK	133216000	1.49043e+08	1.11881	0.162341	no	0.835861	1.09274	1.04777	1.08861	0.935023	1.08215	0.987344	1.33835	0.961371	1.13688	1.20676	0.162341	no
CAMK2G	KCC2G	CAMK	1511500000	1443800000	1325600000	1447600000	1171600000	1758100000	1309100000	1617000000	1337700000	1832000000	1409300000	CAMK2G	KCC2G	CAMK	1380020000	1.54387e+09	1.11873	0.18655	no	1.09527	1.04622	0.960566	1.04897	0.848973	1.27397	0.948609	1.17172	0.969334	1.32752	1.02122	0.18655	no
TK2	KITM	Metabolic	466860000	433720000	524490000	482860000	408400000	567210000	484550000	464920000	509820000	541430000	541050000	TK2	KITM	Metabolic	463266000	5.18163e+08	1.1185	0.0569663	no	1.00776	0.936222	1.13216	1.0423	0.881567	1.22437	1.04594	1.00357	1.10049	1.16872	1.1679	0.0569663	no
CDK17	CDK17	CMGC	2925100000	2538700000	2840800000	2706600000	2248800000	2828200000	2325200000	3069900000	2484200000	3251000000	3676200000	CDK17	CDK17	CMGC	2652000000	2.93912e+09	1.10826	0.281603	no	1.10298	0.957278	1.07119	1.02059	0.847964	1.06644	0.876772	1.15758	0.936727	1.22587	1.3862	0.281603	no
ACVR1	ACVR1	TKL	915870000	917350000	967000000	822730000	820810000	996820000	798070000	1116700000	918580000	1029900000	1010000000	ACVR1	ACVR1	TKL	888752000	978345000	1.10081	0.141524	no	1.03051	1.03218	1.08804	0.925714	0.923553	1.1216	0.897967	1.25648	1.03356	1.15882	1.13643	0.141524	no
IGF1R	IGF1R	TK	2118800000	2235600000	2512200000	2297400000	1980100000	2368500000	2179400000	3000400000	2208800000	2487300000	2476600000	IGF1R	IGF1R	TK	2228820000	2453500000	1.10081	0.185212	no	0.950638	1.00304	1.12714	1.03077	0.888407	1.06267	0.977827	1.34618	0.991018	1.11597	1.11117	0.185212	no
FGFR1	FGFR1	TK	196080000	202360000	195240000	145230000	197670000	186440000	176320000	204000000	231220000	218360000	215560000	FGFR1	FGFR1	TK	187316000	2.05317e+08	1.0961	0.211192	no	1.04679	1.08031	1.0423	0.775321	1.05528	0.995323	0.941297	1.08907	1.23438	1.16573	1.15078	0.211192	no
SRPK1	SRPK1	CMGC	998180000	914880000	785230000	873440000	685500000	730850000	867410000	1123100000	897380000	764370000	1210100000	SRPK1	SRPK1	CMGC	851446000	9.32202e+08	1.09485	0.440433	no	1.17234	1.0745	0.922231	1.02583	0.805101	0.858363	1.01875	1.31905	1.05395	0.897732	1.42123	0.440433	no
ABL1	ABL1	TK	648400000	691370000	760650000	673680000	729920000	784550000	685280000	828050000	768410000	706550000	830050000	ABL1	ABL1	TK	700804000	7.67148e+08	1.09467	0.0735166	no	0.925223	0.986538	1.0854	0.961296	1.04155	1.1195	0.977848	1.18157	1.09647	1.0082	1.18443	0.0735166	no
SLK	SLK	STE	13220000000	13293000000	16181000000	12463000000	17832000000	16759000000	14338000000	14395000000	16302000000	17381000000	16554000000	SLK	SLK	STE	14597800000	1.59548e+10	1.09296	0.245845	no	0.905616	0.910617	1.10845	0.853759	1.22155	1.14805	0.982203	0.986107	1.11674	1.19066	1.13401	0.245845	no
PHKG2	PHKG2	CAMK	105440000	99863000	130210000	139330000	94492000	127610000	98793000	141420000	116660000	144120000	117510000	PHKG2	PHKG2	CAMK	113867000	1.24352e+08	1.09208	0.36844	no	0.925993	0.877014	1.14353	1.22362	0.829845	1.12069	0.867617	1.24198	1.02453	1.26569	1.03199	0.36844	no
MAP3K5	M3K5	STE	205700000	189850000	268230000	278100000	218340000	242240000	244330000	265350000	187000000	284530000	295410000	MAP3K5	M3K5	STE	232044000	2.53143e+08	1.09093	0.393149	no	0.88647	0.818164	1.15594	1.19848	0.940942	1.04394	1.05295	1.14353	0.805882	1.22619	1.27308	0.393149	no
GAK	GAK	Other	2431300000	2232100000	1727900000	2363400000	1454900000	2454300000	2090600000	2429800000	1771600000	2008500000	2577500000	GAK	GAK	Other	2041920000	2222050000	1.08822	0.440589	no	1.19069	1.09314	0.846213	1.15744	0.712516	1.20196	1.02384	1.18996	0.867615	0.983633	1.26229	0.440589	no
NUAK1	NUAK1	CAMK	1261600000	1152900000	1101700000	969130000	1146100000	1182400000	1034600000	1299300000	1189100000	1210900000	1434600000	NUAK1	NUAK1	CAMK	1126286000	1225150000	1.08778	0.213266	no	1.12014	1.02363	0.978171	0.860465	1.01759	1.04982	0.918594	1.15361	1.05577	1.07513	1.27374	0.213266	no
RIPK1	RIPK1	TKL	62401000	44070000	44159000	40279000	40189000	46350000	47893000	44946000	51780000	57088000	53096000	RIPK1	RIPK1	TKL	46219600	5.01922e+07	1.08595	0.376934	no	1.3501	0.953492	0.955417	0.87147	0.869523	1.00282	1.03621	0.972445	1.1203	1.23515	1.14878	0.376934	no
MARK3	MARK3	CAMK	520400000	572640000	674180000	741580000	719720000	656750000	564920000	770320000	623260000	825020000	766090000	MARK3	MARK3	CAMK	645704000	701060000	1.08573	0.37795	no	0.805942	0.886846	1.0441	1.14848	1.11463	1.01711	0.87489	1.19299	0.965241	1.27771	1.18644	0.37795	no
AURKB	AURKB	Other	862170000	532380000	389810000	587180000	367150000	475390000	386180000	1073200000	394420000	382930000	851580000	AURKB	AURKB	Other	547738000	593950000	1.08437	0.773499	no	1.57406	0.971961	0.711672	1.07201	0.670302	0.867915	0.705045	1.95933	0.720089	0.699112	1.55472	0.773499	no
CDK19	CDK19	CMGC	45898000	36438000	39255000	39763000	45788000	48841000	29258000	51524000	42548000	45702000	50958000	CDK19	CDK19	CMGC	41428400	4.48052e+07	1.08151	0.434482	no	1.10789	0.879542	0.947538	0.959801	1.10523	1.17893	0.706231	1.24369	1.02702	1.10316	1.23003	0.434482	no
CDC42BPB	MRCKB	AGC	2248200000	2442300000	2571100000	2117600000	2573600000	2438400000	2428200000	2640300000	2409600000	2529900000	3014000000	CDC42BPB	MRCKB	AGC	2390560000	2.57673e+09	1.07788	0.193181	no	0.940449	1.02164	1.07552	0.885818	1.07657	1.02001	1.01575	1.10447	1.00796	1.05829	1.26079	0.193181	no
PDGFRA	PGFRA	TK	14193000	18993000	16883000	50108000	13206000	16316000	18952000	42184000	19826000	29940000	18699000	PDGFRA	PGFRA	TK	22676600	24319500	1.07245	0.835874	no	0.625887	0.837559	0.744512	2.20968	0.582362	0.719508	0.835751	1.86024	0.874293	1.3203	0.824595	0.835874	no
STK10	STK10	STE	7048000000	7351900000	8235100000	6407300000	8688800000	8123300000	7082300000	6698200000	8967400000	8189300000	9476500000	STK10	STK10	STE	7546220000	8089500000	1.07199	0.393457	no	0.933978	0.974249	1.09129	0.849074	1.15141	1.07647	0.938523	0.887623	1.18833	1.08522	1.25579	0.393457	no
CLK1	CLK1	CMGC	209830000	228560000	193650000	225300000	154880000	177800000	159840000	289190000	164840000	193720000	315850000	CLK1	CLK1	CMGC	202444000	2.16873e+08	1.07128	0.671762	no	1.03648	1.129	0.956561	1.1129	0.765051	0.878268	0.789552	1.42849	0.81425	0.956907	1.56018	0.671762	no
CDK13	CDK13	CMGC	263900000	262720000	222280000	175810000	184650000	234120000	202280000	294710000	245420000	190320000	258620000	CDK13	CDK13	CMGC	221872000	2.37578e+08	1.07079	0.530105	no	1.18942	1.18411	1.00184	0.792394	0.832237	1.0552	0.911697	1.32829	1.10613	0.857792	1.16563	0.530105	no
PAK4	PAK4	STE	4212300000	3339800000	3382200000	3575700000	3824100000	4405800000	3554900000	3356100000	3779500000	4110900000	4333300000	PAK4	PAK4	STE	3666820000	3.92342e+09	1.06998	0.315873	no	1.14876	0.910816	0.92238	0.97515	1.04289	1.20153	0.969478	0.915262	1.03073	1.12111	1.18176	0.315873	no
WEE1	WEE1	Other	1561200000	1236000000	1164000000	1084200000	1074600000	1187500000	1101700000	1557800000	1197900000	1246100000	1562900000	WEE1	WEE1	Other	1224000000	1.30898e+09	1.06943	0.500426	no	1.27549	1.0098	0.95098	0.885784	0.877941	0.97018	0.900082	1.27271	0.978676	1.01806	1.27688	0.500426	no
CSNK1G1	KC1G1	CK1	200830000	193840000	211280000	318450000	221790000	211900000	210620000	341270000	217530000	181840000	306800000	CSNK1G1	KC1G1	CK1	229238000	2.44993e+08	1.06873	0.665497	no	0.876076	0.845584	0.921662	1.38917	0.96751	0.924367	0.918783	1.48871	0.948926	0.793237	1.33835	0.665497	no
TYK2	TYK2	TK	136470000	147170000	137780000	130290000	123020000	116700000	109930000	187220000	137830000	153110000	160120000	TYK2	TYK2	TK	134946000	1.44152e+08	1.06822	0.512699	no	1.01129	1.09058	1.021	0.965497	0.911624	0.86479	0.814622	1.38737	1.02137	1.1346	1.18655	0.512699	no
PIP4K2A	PI42A	Metabolic	303560000	299230000	311710000	390470000	320350000	383550000	290820000	314920000	296360000	362710000	430560000	PIP4K2A	PI42A	Metabolic	325064000	3.46487e+08	1.0659	0.481762	no	0.933847	0.920526	0.958919	1.20121	0.985498	1.17992	0.894655	0.968794	0.911697	1.11581	1.32454	0.481762	no
TAOK1	TAOK1	STE	858170000	647300000	698480000	721720000	640770000	745630000	684930000	711690000	640030000	751290000	1025600000	TAOK1	TAOK1	STE	713288000	7.59862e+08	1.06529	0.528823	no	1.20312	0.907488	0.97924	1.01182	0.898333	1.04534	0.960243	0.99776	0.897295	1.05328	1.43785	0.528823	no
CDK16	CDK16	CMGC	709940000	630710000	693810000	725830000	717850000	720670000	657560000	761640000	692560000	799380000	806700000	CDK16	CDK16	CMGC	695628000	7.39752e+08	1.06343	0.189242	no	1.02057	0.906677	0.997387	1.04342	1.03195	1.036	0.945275	1.0949	0.99559	1.14915	1.15967	0.189242	no
INSR	INSR	TK	1382900000	1677000000	1888400000	1602500000	1412500000	1711000000	1396900000	2145900000	1569600000	1725900000	1611800000	INSR	INSR	TK	1592660000	1.69352e+09	1.06333	0.492202	no	0.868296	1.05296	1.18569	1.00618	0.886881	1.0743	0.877086	1.34737	0.985521	1.08366	1.01202	0.492202	no
EPHA7	EPHA7	TK	105930000	104870000	109650000	87305000	79957000	116550000	96634000	105770000	93882000	105630000	103200000	EPHA7	EPHA7	TK	97542400	103611000	1.06221	0.367546	no	1.08599	1.07512	1.12413	0.895047	0.819715	1.19487	0.990687	1.08435	0.962474	1.08291	1.058	0.367546	no
MAP2K3	MP2K3	STE	250010000	271020000	288110000	218880000	274610000	291150000	301760000	153520000	254860000	270880000	388180000	MAP2K3	MP2K3	STE	260526000	276725000	1.06218	0.663629	no	0.959636	1.04028	1.10588	0.840146	1.05406	1.11755	1.15827	0.589269	0.978252	1.03974	1.48999	0.663629	no
YES1	YES	TK	6982600000	7969700000	4532700000	6735200000	5583500000	6785900000	5437100000	8799700000	6094500000	4837700000	8579400000	YES1	YES	TK	6360740000	6.75572e+09	1.0621	0.675184	no	1.09777	1.25295	0.712606	1.05887	0.877807	1.06684	0.85479	1.38344	0.958143	0.760556	1.34881	0.675184	no
CLK4	CLK4	CMGC	84321000	70795000	43584000	79900000	35003000	42226000	37959000	94937000	53560000	58346000	112470000	CLK4	CLK4	CMGC	62720600	66583000	1.06158	0.817989	no	1.34439	1.12874	0.694891	1.2739	0.558078	0.67324	0.605208	1.51365	0.853946	0.930253	1.79319	0.817989	no
CSNK1D	KC1D	CK1	1132700000	1130200000	1121100000	892380000	1699400000	1318400000	1159500000	888710000	1483000000	1239200000	1510300000	CSNK1D	KC1D	CK1	1195156000	1.26652e+09	1.05971	0.664907	no	0.947742	0.945651	0.938037	0.746664	1.42191	1.10312	0.970166	0.743593	1.24084	1.03685	1.26368	0.664907	no
STK16	STK16	Other	494230000	676310000	662640000	745450000	453510000	646220000	632140000	697770000	569240000	675510000	633240000	STK16	STK16	Other	606428000	6.42353e+08	1.05924	0.526713	no	0.814985	1.11524	1.09269	1.22925	0.747838	1.06562	1.0424	1.15062	0.938677	1.11392	1.04421	0.526713	no
CSNK1E	KC1E	CK1	256660000	243830000	240790000	232000000	334140000	300400000	291690000	259850000	261460000	267540000	278940000	CSNK1E	KC1E	CK1	261484000	2.76647e+08	1.05799	0.431008	no	0.981551	0.932485	0.920859	0.887244	1.27786	1.14883	1.11552	0.993751	0.999908	1.02316	1.06676	0.431008	no
NEK9	NEK9	NEK	20140000000	19465000000	19995000000	20432000000	19710000000	21820000000	19316000000	22262000000	19727000000	21888000000	21321000000	NEK9	NEK9	NEK	19948400000	2.10557e+10	1.05551	0.0869621	no	1.0096	0.975767	1.00234	1.02424	0.988049	1.09382	0.968298	1.11598	0.988901	1.09723	1.06881	0.0869621	no
CHKA	CHKA	Metabolic	187480000	145370000	157240000	182570000	105370000	166190000	128080000	209670000	125330000	144880000	208820000	CHKA	CHKA	Metabolic	155606000	1.63828e+08	1.05284	0.714315	no	1.20484	0.934218	1.0105	1.17328	0.677159	1.06802	0.823105	1.34744	0.805432	0.931069	1.34198	0.714315	no
CDKL5	CDKL5	CMGC	81380000	61544000	62265000	68683000	57046000	59374000	48160000	87511000	66510000	72650000	83816000	CDKL5	CDKL5	CMGC	66183600	6.96702e+07	1.05268	0.662293	no	1.22961	0.929898	0.940792	1.03776	0.861936	0.89711	0.727673	1.32225	1.00493	1.0977	1.26642	0.662293	no
CLK3	CLK3	CMGC	119360000	121490000	96585000	99158000	87442000	107860000	92424000	103340000	122390000	108210000	127510000	CLK3	CLK3	CMGC	104807000	110289000	1.05231	0.527967	no	1.13886	1.15918	0.921551	0.946101	0.834315	1.02913	0.881849	0.986003	1.16777	1.03247	1.21662	0.527967	no
EPHB4	EPHB4	TK	1205600000	1248100000	1114500000	1207300000	1019100000	1132100000	1164900000	1327400000	1103400000	1365200000	1222500000	EPHB4	EPHB4	TK	1158920000	1219250000	1.05206	0.347594	no	1.04028	1.07695	0.961671	1.04175	0.879353	0.976858	1.00516	1.14538	0.952093	1.17799	1.05486	0.347594	no
SIK1	SIK1	CAMK	31343000	37458000	31472000	28772000	36555000	36781000	31231000	37083000	30490000	41117000	31593000	SIK1	SIK1	CAMK	33120000	3.47158e+07	1.04818	0.529254	no	0.946347	1.13098	0.950242	0.86872	1.10371	1.11054	0.942965	1.11966	0.920592	1.24146	0.953895	0.529254	no
BMPR1A	BMR1A	TKL	120660000	109090000	134750000	120310000	103300000	133100000	108880000	142100000	104040000	141930000	108860000	BMPR1A	BMR1A	TKL	117622000	1.23152e+08	1.04701	0.571058	no	1.02583	0.927463	1.14562	1.02285	0.878237	1.13159	0.925677	1.20811	0.884528	1.20666	0.925507	0.571058	no
PRKD2	KPCD2	CAMK	2021700000	2007000000	1793400000	1710900000	1865900000	1881000000	1686900000	1786200000	1809700000	2220300000	2412700000	PRKD2	KPCD2	CAMK	1879780000	1.96613e+09	1.04594	0.551627	no	1.0755	1.06768	0.954048	0.91016	0.992616	1.00065	0.897392	0.950218	0.962719	1.18115	1.2835	0.551627	no
BCKDK	BCKD	Atypical	112550000	150010000	150100000	130620000	145560000	135740000	103950000	215250000	116200000	156240000	135980000	BCKDK	BCKD	Atypical	137768000	1.43893e+08	1.04446	0.75351	no	0.816953	1.08886	1.08951	0.948116	1.05656	0.98528	0.754529	1.56241	0.843447	1.13408	0.987022	0.75351	no
ILK	ILK	TKL	810170000	800830000	685580000	1048100000	787580000	900530000	815150000	764640000	882200000	849720000	960780000	ILK	ILK	TKL	826452000	862170000	1.04322	0.579708	no	0.980299	0.968998	0.829546	1.26819	0.952965	1.08963	0.986325	0.925208	1.06745	1.02815	1.16254	0.579708	no
FRK	FRK	TK	150450000	130860000	127950000	119000000	89731000	129840000	122120000	142760000	104660000	146100000	127970000	FRK	FRK	TK	123598200	1.28908e+08	1.04296	0.646974	no	1.21725	1.05875	1.03521	0.962797	0.72599	1.0505	0.98804	1.15503	0.846776	1.18206	1.03537	0.646974	no
PRKD1	KPCD1	CAMK	20971000	30651000	18384000	30035000	41830000	20988000	13755000	52931000	35515000	28126000	26145000	PRKD1	KPCD1	CAMK	28374200	2.95767e+07	1.04238	0.870542	no	0.739087	1.08024	0.647913	1.05853	1.47423	0.739686	0.484771	1.86546	1.25167	0.991253	0.921436	0.870542	no
TEK	TIE2	TK	97589000	111280000	160070000	81702000	84031000	97750000	72020000	135970000	109240000	131150000	122340000	TEK	TIE2	TK	106934400	1.11412e+08	1.04187	0.796119	no	0.912606	1.04064	1.4969	0.764039	0.785818	0.914112	0.673497	1.27153	1.02156	1.22645	1.14407	0.796119	no
TGFBR2	TGFR2	TKL	1680000000	1708400000	1825500000	1898600000	1691800000	1870700000	1711000000	2178200000	1528700000	1987900000	1699800000	TGFBR2	TGFR2	TKL	1760860000	1.82938e+09	1.03891	0.555191	no	0.954079	0.970208	1.03671	1.07822	0.960781	1.06238	0.971684	1.23701	0.868155	1.12894	0.965324	0.555191	no
MET	MET	TK	1867100000	2457200000	2145700000	1613600000	1879500000	2054500000	1717700000	2434200000	1897300000	2183400000	2124400000	MET	MET	TK	1992620000	2.06858e+09	1.03812	0.666581	no	0.937008	1.23315	1.07682	0.809788	0.943231	1.03105	0.862031	1.22161	0.952163	1.09574	1.06613	0.666581	no
AKT2	AKT2	AGC	91538000	91475000	97574000	90497000	78700000	89209000	79614000	71625000	94678000	106820000	117810000	AKT2	AKT2	AGC	89956800	9.32927e+07	1.03708	0.693534	no	1.01758	1.01688	1.08468	1.00601	0.874864	0.991687	0.885025	0.796216	1.05248	1.18746	1.30963	0.693534	no
DDR1	DDR1	TK	107460000	73170000	47693000	113160000	65627000	80968000	76614000	113790000	69797000	88382000	76841000	DDR1	DDR1	TK	81422000	8.43987e+07	1.03656	0.828312	no	1.31979	0.898651	0.585751	1.3898	0.806011	0.994424	0.94095	1.39753	0.857225	1.08548	0.943738	0.828312	no
CDK14	CDK14	CMGC	165480000	187790000	166240000	168380000	152400000	157560000	158100000	152150000	179950000	200420000	194600000	CDK14	CDK14	CMGC	168058000	1.73797e+08	1.03415	0.604254	no	0.98466	1.11741	0.989182	1.00192	0.90683	0.937533	0.940747	0.905342	1.07076	1.19256	1.15793	0.604254	no
MARK2	MARK2	CAMK	3478400000	2742100000	2668000000	3029400000	2847800000	2745500000	2493500000	3572900000	2845100000	3067900000	3596400000	MARK2	MARK2	CAMK	2953140000	3053550000	1.034	0.687693	no	1.17786	0.928537	0.903445	1.02582	0.964329	0.929688	0.844355	1.20986	0.963415	1.03886	1.21782	0.687693	no
CSNK1G3	KC1G3	CK1	124020000	133420000	147900000	81473000	153950000	134300000	122820000	91256000	125170000	160130000	160660000	CSNK1G3	KC1G3	CK1	128152600	1.32389e+08	1.03306	0.803198	no	0.967753	1.0411	1.15409	0.63575	1.2013	1.04797	0.958389	0.712089	0.976726	1.24953	1.25366	0.803198	no
PRKD3	KPCD3	CAMK	1499800000	1791800000	1895900000	1981600000	1808800000	1786800000	1883800000	2078600000	1853900000	1685700000	1835300000	PRKD3	KPCD3	CAMK	1795580000	1.85402e+09	1.03254	0.549566	no	0.835273	0.997895	1.05587	1.1036	1.00736	0.99511	1.04913	1.15762	1.03248	0.938805	1.02212	0.549566	no
STK24	STK24	STE	523300000	357230000	486530000	505060000	468600000	519740000	447680000	416600000	432240000	519890000	556980000	STK24	STK24	STE	468144000	4.82188e+08	1.03	0.712473	no	1.11782	0.763077	1.03927	1.07886	1.00097	1.11021	0.956287	0.889897	0.923306	1.11053	1.18976	0.712473	no
FER	FER	TK	9838500000	9988900000	8493800000	9267100000	8108600000	9529600000	7474900000	11611000000	8017900000	9432400000	10396000000	FER	FER	TK	9139380000	9410300000	1.02964	0.730086	no	1.0765	1.09295	0.929363	1.01397	0.887216	1.0427	0.817878	1.27044	0.877291	1.03206	1.1375	0.730086	no
AURKA	STK6	Other	3951500000	2927000000	3118000000	3455200000	3006700000	3506900000	2556900000	3822500000	3034800000	3186900000	4214800000	AURKA	STK6	Other	3291680000	3.38713e+09	1.029	0.769369	no	1.20045	0.889212	0.947237	1.04968	0.913424	1.06538	0.776777	1.16126	0.921961	0.968168	1.28044	0.769369	no
HK1	HXK1	Metabolic	252100000	234370000	190980000	291560000	215100000	206710000	214050000	375740000	172210000	304530000	188180000	HK1	HXK1	Metabolic	236822000	243570000	1.02849	0.86655	no	1.06451	0.989646	0.806428	1.23114	0.908277	0.87285	0.903843	1.58659	0.727171	1.2859	0.794605	0.86655	no
EPHB3	EPHB3	TK	139680000	126570000	131670000	172500000	108740000	126220000	133710000	155670000	124170000	158360000	138880000	EPHB3	EPHB3	TK	135832000	1.39502e+08	1.02702	0.75739	no	1.02833	0.931813	0.969359	1.26995	0.800548	0.929236	0.984378	1.14605	0.914144	1.16585	1.02244	0.75739	no
CHEK2	CHK2	CAMK	71758000	97918000	71090000	63565000	82424000	88478000	79158000	63237000	76029000	86211000	83276000	CHEK2	CHK2	CAMK	77351000	7.93982e+07	1.02647	0.769305	no	0.927693	1.26589	0.919057	0.821773	1.06558	1.14385	1.02336	0.817533	0.982909	1.11454	1.0766	0.769305	no
EPHA4	EPHA4	TK	447820000	370960000	391800000	393290000	334700000	410870000	408640000	373670000	373850000	430300000	389550000	EPHA4	EPHA4	TK	387714000	3.97813e+08	1.02605	0.616762	no	1.15503	0.956788	1.01054	1.01438	0.863265	1.05972	1.05397	0.963777	0.964242	1.10984	1.00474	0.616762	no
SIK2	SIK2	CAMK	787420000	756010000	835950000	1053100000	711930000	823540000	621990000	980380000	751330000	1019700000	901940000	SIK2	SIK2	CAMK	828882000	8.49813e+08	1.02525	0.813369	no	0.949978	0.912084	1.00853	1.27051	0.858904	0.993555	0.750396	1.18277	0.906438	1.23021	1.08814	0.813369	no
PRKCD	KPCD	AGC	290470000	317200000	280870000	316330000	226180000	290330000	246420000	260820000	252360000	330040000	380630000	PRKCD	KPCD	AGC	286210000	2.93433e+08	1.02524	0.803164	no	1.01488	1.10828	0.981342	1.10524	0.790259	1.0144	0.860976	0.911289	0.88173	1.15314	1.3299	0.803164	no
EPHB2	EPHB2	TK	5201100000	5865500000	5951600000	4989000000	4142300000	5035400000	4939500000	5542900000	5398500000	5446000000	5772400000	EPHB2	EPHB2	TK	5229900000	5.35578e+09	1.02407	0.711096	no	0.994493	1.12153	1.13799	0.953938	0.792042	0.96281	0.944473	1.05985	1.03224	1.04132	1.10373	0.711096	no
PRKACB	KAPCB	AGC	864020000	1053000000	775400000	1009500000	1188500000	1060200000	801660000	1230400000	812740000	1061000000	1040500000	PRKACB	KAPCB	AGC	978084000	1.00108e+09	1.02351	0.821802	no	0.88338	1.07659	0.792774	1.03212	1.21513	1.08396	0.819623	1.25797	0.830951	1.08477	1.06381	0.821802	no
PIK3C3	PK3C3	Metabolic	169780000	334760000	190950000	199080000	102770000	256620000	169210000	148060000	199890000	242100000	208540000	PIK3C3	PK3C3	Metabolic	199468000	204070000	1.02307	0.908504	no	0.851164	1.67826	0.957296	0.998055	0.51522	1.28652	0.848306	0.742274	1.00212	1.21373	1.04548	0.908504	no
GSK3B	GSK3B	CMGC	8730400000	8668200000	8332900000	9460400000	7982600000	8181700000	7308100000	11107000000	8033200000	9219400000	9053600000	GSK3B	GSK3B	CMGC	8634900000	8.81717e+09	1.02111	0.78131	no	1.01106	1.00386	0.965026	1.0956	0.924458	0.947515	0.846344	1.28629	0.930318	1.06769	1.04849	0.78131	no
BMPR1B	BMR1B	TKL	25862000	30727000	34235000	25680000	25999000	27015000	28950000	45047000	24632000	30041000	18629000	BMPR1B	BMR1B	TKL	28500600	2.90523e+07	1.01936	0.900102	no	0.907419	1.07812	1.2012	0.901034	0.912226	0.947875	1.01577	1.58056	0.864263	1.05405	0.653635	0.900102	no
MAP2K2	MP2K2	STE	6520000000	6619700000	5404500000	5786700000	7436600000	6776300000	6338700000	4712200000	6103700000	6940100000	7914900000	MAP2K2	MP2K2	STE	6353500000	6.46432e+09	1.01744	0.85165	no	1.02621	1.0419	0.850634	0.910789	1.17047	1.06655	0.997671	0.74167	0.960683	1.09233	1.24575	0.85165	no
PLK1	PLK1	Other	279290000	257700000	256140000	226100000	183680000	202260000	192370000	279690000	261070000	212640000	319870000	PLK1	PLK1	Other	240582000	244650000	1.01691	0.88451	no	1.16089	1.07115	1.06467	0.939804	0.763482	0.840711	0.799603	1.16256	1.08516	0.883857	1.32957	0.88451	no
MAST4	MAST4	AGC	66102000	42786000	40131000	42417000	40416000	34372000	41633000	63205000	32242000	39853000	70907000	MAST4	MAST4	AGC	46370400	4.70353e+07	1.01434	0.93953	no	1.42552	0.922701	0.865444	0.914743	0.87159	0.741249	0.897836	1.36305	0.695314	0.859449	1.52914	0.93953	no
MAP3K2	M3K2	STE	884120000	1023800000	1043000000	868610000	1032100000	1041600000	959680000	765010000	1036400000	1031900000	1060700000	MAP3K2	M3K2	STE	970326000	9.82548e+08	1.0126	0.84662	no	0.911158	1.05511	1.0749	0.895173	1.06366	1.07345	0.989028	0.788405	1.06809	1.06346	1.09314	0.84662	no
PKMYT1	PMYT1	Other	104920000	129860000	113800000	185300000	114480000	113330000	105120000	158560000	140820000	122720000	142740000	PKMYT1	PMYT1	Other	129672000	1.30548e+08	1.00676	0.957346	no	0.809118	1.00145	0.877599	1.42899	0.882843	0.873974	0.810661	1.22278	1.08597	0.946388	1.10078	0.957346	no
NEK2	NEK2	NEK	124190000	125330000	143410000	98248000	120970000	121780000	113550000	143330000	123110000	132760000	104120000	NEK2	NEK2	NEK	122429600	1.23108e+08	1.00554	0.941624	no	1.01438	1.02369	1.17137	0.802486	0.988078	0.994694	0.927472	1.17071	1.00556	1.08438	0.850448	0.941624	no
DCK	DCK	Metabolic	10645000000	8928200000	9991800000	8326600000	8648100000	9667300000	8488600000	9135100000	8140500000	10751000000	9897700000	DCK	DCK	Metabolic	9307940000	9346700000	1.00416	0.94866	no	1.14365	0.959203	1.07347	0.89457	0.92911	1.03861	0.911974	0.981431	0.874576	1.15504	1.06336	0.94866	no
MELK	MELK	CAMK	709790000	783640000	661480000	521970000	543650000	525570000	536580000	843260000	578630000	571620000	823080000	MELK	MELK	CAMK	644106000	6.46457e+08	1.00365	0.977114	no	1.10198	1.21663	1.02697	0.810379	0.844038	0.815968	0.833062	1.30919	0.898346	0.887463	1.27786	0.977114	no
IPMK	IPMK	Metabolic	128730000	128720000	131920000	113210000	155770000	141500000	125010000	107610000	120440000	131550000	166680000	IPMK	IPMK	Metabolic	131670000	1.32132e+08	1.00351	0.967653	no	0.977671	0.977596	1.0019	0.859801	1.18303	1.07466	0.949419	0.81727	0.914711	0.999089	1.26589	0.967653	no
STK3	STK3	STE	1446100000	1694000000	1713900000	1702800000	1689100000	1626600000	1490200000	1454400000	1511200000	1854000000	1974900000	STK3	STK3	STE	1649180000	1.65188e+09	1.00164	0.980452	no	0.87686	1.02718	1.03924	1.03251	1.02421	0.986308	0.903601	0.881893	0.916334	1.1242	1.1975	0.980452	no
CDK7	CDK7	CMGC	2270400000	2093600000	2344900000	2472300000	1925300000	2375400000	1909700000	2481400000	1873300000	2100500000	2600100000	CDK7	CDK7	CMGC	2221300000	2223400000	1.00095	0.990003	no	1.0221	0.942511	1.05564	1.113	0.866745	1.06937	0.859722	1.11709	0.843335	0.945617	1.17053	0.990003	no
MAP2K5	MP2K5	STE	289730000	343250000	309170000	286440000	411780000	361940000	353680000	249570000	320450000	311540000	369830000	MAP2K5	MP2K5	STE	328074000	327835000	0.999272	0.993634	no	0.883124	1.04626	0.942379	0.873096	1.25514	1.10323	1.07805	0.760713	0.976761	0.949603	1.12728	0.993634	no
ABL2	ABL2	TK	1192800000	1184000000	1225200000	1148700000	1240900000	1194200000	1098500000	1247100000	1152900000	1194400000	1273700000	ABL2	ABL2	TK	1198320000	1.19347e+09	0.99595	0.882976	no	0.995394	0.98805	1.02243	0.958592	1.03553	0.996562	0.9167	1.04071	0.962097	0.996729	1.0629	0.882976	no
IRAK4	IRAK4	TKL	2642900000	2524700000	2778900000	2841600000	2557300000	2646800000	2185200000	2523400000	2444000000	2878000000	3266900000	IRAK4	IRAK4	TKL	2669080000	2.65738e+09	0.995618	0.949203	no	0.990191	0.945906	1.04115	1.06464	0.95812	0.991653	0.818709	0.945419	0.915671	1.07827	1.22398	0.949203	no
IRAK3	IRAK3	TKL	548230000	618330000	548440000	602450000	538300000	528820000	498770000	642170000	484380000	620150000	635400000	IRAK3	IRAK3	TKL	571150000	5.68282e+08	0.994978	0.937846	no	0.95987	1.08261	0.960238	1.0548	0.942484	0.925886	0.873273	1.12435	0.848078	1.08579	1.11249	0.937846	no
CDK10	CDK10	CMGC	66166000	39530000	55151000	67378000	37551000	49945000	45677000	78445000	42970000	36727000	63157000	CDK10	CDK10	CMGC	53155200	5.28202e+07	0.993697	0.971083	no	1.24477	0.743671	1.03755	1.26757	0.706441	0.939607	0.859314	1.47577	0.808388	0.690939	1.18816	0.971083	no
PIP4K2B	PI42B	Metabolic	211570000	195090000	189300000	211250000	176540000	207350000	180290000	165790000	169650000	234190000	214270000	PIP4K2B	PI42B	Metabolic	196750000	1.95257e+08	0.99241	0.916145	no	1.07532	0.991563	0.962135	1.0737	0.897281	1.05388	0.916341	0.842643	0.862262	1.19029	1.08905	0.916145	no
CDK1	CDK1	CMGC	10150000000	11732000000	9542500000	9892400000	8738100000	12616000000	9964400000	8272800000	9190400000	8070200000	11220000000	CDK1	CDK1	CMGC	10011000000	9.88897e+09	0.98781	0.896602	no	1.01388	1.17191	0.953201	0.988153	0.87285	1.26021	0.995345	0.826371	0.91803	0.806133	1.12077	0.896602	no
EIF2AK2	E2AK2	Other	885620000	1153600000	821390000	713020000	780740000	973930000	903700000	746250000	849050000	790900000	894470000	EIF2AK2	E2AK2	Other	870874000	8.59717e+08	0.987188	0.889488	no	1.01693	1.32465	0.943179	0.818741	0.896502	1.11834	1.03769	0.856898	0.97494	0.908168	1.02709	0.889488	no
MAP4K2	M4K2	STE	61903000	29458000	29168000	55311000	28113000	38212000	45443000	26948000	31538000	35678000	63439000	MAP4K2	M4K2	STE	40790600	4.02097e+07	0.985758	0.94911	no	1.51758	0.722176	0.715067	1.35597	0.689203	0.936784	1.11406	0.660642	0.773168	0.874662	1.55524	0.94911	no
TNK2	ACK1	TK	450140000	400950000	386960000	457470000	373810000	391930000	321770000	453710000	354890000	415870000	501340000	TNK2	ACK1	TK	413866000	406585000	0.982407	0.831376	no	1.08765	0.968792	0.934989	1.10536	0.903215	0.946997	0.777474	1.09627	0.8575	1.00484	1.21136	0.831376	no
PIP4K2C	PI42C	Metabolic	1261700000	1033500000	1028200000	1413500000	939430000	1126300000	993030000	1205600000	966190000	1223600000	1159300000	PIP4K2C	PI42C	Metabolic	1135266000	1.11234e+09	0.979803	0.810938	no	1.11137	0.910359	0.905691	1.24508	0.827498	0.992102	0.874711	1.06195	0.851069	1.07781	1.02117	0.810938	no
ROCK1	ROCK1	AGC	1425300000	1610000000	1834000000	1433900000	1527100000	1493300000	1400500000	1561200000	1428800000	1651300000	1667400000	ROCK1	ROCK1	AGC	1566060000	1533750000	0.979369	0.71114	no	0.910118	1.02806	1.17109	0.91561	0.975122	0.953539	0.894282	0.996897	0.912353	1.05443	1.06471	0.71114	no
MAP2K6	MP2K6	STE	612860000	451020000	441590000	457580000	411840000	533150000	410870000	393250000	373440000	555020000	519680000	MAP2K6	MP2K6	STE	474978000	464235000	0.977382	0.828838	no	1.29029	0.94956	0.929706	0.963371	0.867072	1.12247	0.86503	0.827933	0.786226	1.16852	1.09411	0.828838	no
CDK6	CDK6	CMGC	3139700000	3187000000	3634900000	3122600000	2763900000	3155000000	2650000000	4329000000	2265800000	2901700000	3261700000	CDK6	CDK6	CMGC	3169620000	3.09387e+09	0.9761	0.829374	no	0.99056	1.00548	1.14679	0.985165	0.871997	0.995387	0.836062	1.36578	0.714849	0.915473	1.02905	0.829374	no
PKN3	PKN3	AGC	18527000	24622000	23909000	19630000	20064000	14836000	13903000	30448000	20261000	22063000	23526000	PKN3	PKN3	AGC	21350400	20839500	0.976071	0.866878	no	0.867759	1.15323	1.11984	0.919421	0.939748	0.694882	0.651182	1.42611	0.948975	1.03338	1.1019	0.866878	no
STK32C	ST32C	Other	35233000	34048000	36761000	25775000	33838000	41955000	28380000	24328000	21616000	38706000	38810000	STK32C	ST32C	Other	33131000	3.22992e+07	0.974893	0.849072	no	1.06345	1.02768	1.10957	0.777972	1.02134	1.26634	0.8566	0.734297	0.65244	1.16827	1.17141	0.849072	no
LIMK2	LIMK2	TKL	85840000	94087000	83241000	87822000	86836000	83504000	86941000	79554000	71104000	78910000	110660000	LIMK2	LIMK2	TKL	87565200	8.51122e+07	0.971986	0.708145	no	0.980298	1.07448	0.950617	1.00293	0.991672	0.953621	0.992872	0.908512	0.812012	0.901157	1.26374	0.708145	no
PTK2	FAK1	TK	8803000000	10756000000	11310000000	8228400000	8350500000	9481300000	7078000000	10539000000	9236700000	8114100000	10764000000	PTK2	FAK1	TK	9489580000	9.20218e+09	0.969715	0.746732	no	0.927649	1.13345	1.19183	0.867098	0.879965	0.999127	0.745871	1.11059	0.973352	0.855054	1.1343	0.746732	no
MINK1	MINK1	STE	218120000	133210000	139020000	173840000	141760000	129220000	138240000	162170000	149340000	144850000	213400000	MINK1	MINK1	STE	161190000	1.56203e+08	0.969063	0.806459	no	1.35319	0.826416	0.86246	1.07848	0.879459	0.801663	0.857621	1.00608	0.926484	0.898629	1.3239	0.806459	no
GSK3A	GSK3A	CMGC	5891700000	5833900000	5738500000	4849600000	6062500000	6129500000	5188200000	6304000000	4929200000	5246500000	5110400000	GSK3A	GSK3A	CMGC	5675240000	5.48463e+09	0.966414	0.571632	no	1.03814	1.02796	1.01115	0.854519	1.06824	1.08004	0.914182	1.11079	0.868545	0.924454	0.900473	0.571632	no
MAP4K3	M4K3	STE	940100000	744900000	745560000	700970000	620900000	820240000	622930000	695250000	597690000	700190000	896430000	MAP4K3	M4K3	STE	750486000	7.22122e+08	0.962205	0.696585	no	1.25265	0.992557	0.993436	0.934021	0.827331	1.09295	0.830035	0.9264	0.796404	0.932982	1.19447	0.696585	no
ROCK2	ROCK2	AGC	1866500000	2097300000	2490700000	1663300000	2346100000	2208800000	1936600000	1564100000	1763000000	2402400000	2163800000	ROCK2	ROCK2	AGC	2092780000	2006450000	0.958749	0.669594	no	0.891876	1.00216	1.19014	0.79478	1.12104	1.05544	0.925372	0.747379	0.84242	1.14795	1.03394	0.669594	no
AKT1	AKT1	AGC	69931000	59925000	39400000	54447000	47334000	53433000	52885000	39382000	45833000	54515000	65196000	AKT1	AKT1	AGC	54207400	51874000	0.956954	0.712966	no	1.29006	1.10548	0.726838	1.00442	0.873202	0.985714	0.975605	0.726506	0.845512	1.00567	1.20271	0.712966	no
PFKP	K6PP	Metabolic	113260000	118360000	102730000	105160000	80602000	108330000	112280000	97301000	103150000	99111000	75890000	PFKP	K6PP	Metabolic	104022400	9.93437e+07	0.955022	0.583238	no	1.0888	1.13783	0.987576	1.01094	0.774852	1.04141	1.07938	0.935385	0.991613	0.952785	0.729554	0.583238	no
STK4	STK4	STE	6242200000	7000400000	5951100000	7658800000	7146200000	6805100000	5663200000	7360900000	5908800000	6177400000	7026800000	STK4	STK4	STE	6799740000	6.49037e+09	0.954502	0.473319	no	0.918006	1.02951	0.875195	1.12634	1.05095	1.00079	0.832855	1.08253	0.868974	0.908476	1.03339	0.473319	no
CLK2	CLK2	CMGC	319710000	158300000	130130000	182680000	90908000	136530000	132940000	239310000	99013000	107690000	292210000	CLK2	CLK2	CMGC	176345600	1.67949e+08	0.952385	0.870473	no	1.81297	0.897669	0.737926	1.03592	0.51551	0.774218	0.753861	1.35705	0.561471	0.610676	1.65703	0.870473	no
PKN2	PKN2	AGC	1168000000	1166800000	1132700000	905140000	1089400000	1104900000	1006000000	933640000	862300000	1154700000	1174600000	PKN2	PKN2	AGC	1092408000	1.03936e+09	0.951436	0.480388	no	1.0692	1.0681	1.03688	0.828573	0.997246	1.01144	0.920901	0.854662	0.789357	1.05702	1.07524	0.480388	no
SRC	SRC	TK	9625900000	9148500000	8885200000	12290000000	10501000000	9388000000	8702400000	9844000000	8961300000	9750100000	10851000000	SRC	SRC	TK	10090120000	9582800000	0.949721	0.457141	no	0.953993	0.906679	0.880584	1.21802	1.04072	0.930415	0.862467	0.975608	0.888126	0.966302	1.07541	0.457141	no
DDR2	DDR2	TK	129780000	95789000	159520000	183690000	109760000	103580000	95645000	156240000	122790000	159960000	132650000	DDR2	DDR2	TK	135707800	128477500	0.946722	0.709557	no	0.956319	0.705847	1.17547	1.35357	0.808797	0.763258	0.704786	1.1513	0.904812	1.17871	0.977468	0.709557	no
TBK1	TBK1	Other	3692800000	3751900000	3464900000	3968700000	3367400000	3602100000	3401200000	3379000000	2817100000	3662100000	3851500000	TBK1	TBK1	Other	3649140000	3.45217e+09	0.946022	0.321464	no	1.01196	1.02816	0.949511	1.08757	0.922793	0.987109	0.932055	0.925972	0.77199	1.00355	1.05545	0.321464	no
MAP3K1	M3K1	STE	128160000	92485000	72909000	145670000	85953000	97832000	92301000	125760000	67471000	84601000	127270000	MAP3K1	M3K1	STE	105035400	9.92058e+07	0.944499	0.728475	no	1.22016	0.880513	0.694137	1.38687	0.818324	0.931419	0.878761	1.19731	0.642364	0.805452	1.21169	0.728475	no
CAMK1D	KCC1D	CAMK	61424000	55168000	57153000	104000000	49618000	71442000	54672000	35790000	43338000	83685000	81339000	CAMK1D	KCC1D	CAMK	65472600	61711000	0.942547	0.773541	no	0.938163	0.842612	0.87293	1.58845	0.757844	1.09117	0.835036	0.546641	0.661926	1.27817	1.24234	0.773541	no
PKN1	PKN1	AGC	2309700000	2315000000	2368500000	2119800000	2599400000	2417100000	2167100000	2104700000	1857500000	2346600000	2343600000	PKN1	PKN1	AGC	2342480000	2206100000	0.94178	0.27278	no	0.986006	0.988269	1.01111	0.904938	1.10968	1.03186	0.925131	0.898492	0.792963	1.00176	1.00048	0.27278	no
STRADA	STRAA	STE	231730000	278330000	196500000	215710000	204890000	221840000	194530000	210420000	179510000	220430000	246940000	STRADA	STRAA	STE	225432000	2.12278e+08	0.941651	0.454241	no	1.02794	1.23465	0.87166	0.956874	0.908877	0.984066	0.862921	0.933408	0.796293	0.977811	1.09541	0.454241	no
NME4	NDKM	Metabolic	36878000	45637000	39494000	74607000	28234000	38923000	29423000	49442000	32818000	40449000	62838000	NME4	NDKM	Metabolic	44970000	42315500	0.940972	0.775249	no	0.820058	1.01483	0.87823	1.65904	0.627841	0.865533	0.654281	1.09944	0.729775	0.899466	1.39733	0.775249	no
RIPK2	RIPK2	TKL	1065300000	993540000	612200000	1239400000	834200000	949770000	857640000	936400000	798420000	865040000	944980000	RIPK2	RIPK2	TKL	948928000	8.92042e+08	0.940052	0.583198	no	1.12264	1.04701	0.645149	1.30611	0.879097	1.00089	0.903799	0.986798	0.841392	0.911597	0.99584	0.583198	no
TNK1	TNK1	TK	32292000	31436000	30830000	33911000	32947000	33293000	27573000	28602000	28831000	34736000	29005000	TNK1	TNK1	TK	32283200	30340000	0.939808	0.201037	no	1.00027	0.973757	0.954986	1.05042	1.02056	1.03128	0.854097	0.885972	0.893065	1.07598	0.898455	0.201037	no
CDK4	CDK4	CMGC	536530000	483820000	593620000	481610000	562570000	574160000	428920000	570280000	389840000	476110000	551730000	CDK4	CDK4	CMGC	531630000	4.98507e+08	0.937695	0.435714	no	1.00922	0.910069	1.1166	0.905912	1.0582	1.08	0.806802	1.0727	0.733292	0.895566	1.03781	0.435714	no
MYLK	MYLK	CAMK	2969500000	3142100000	3079300000	4091500000	2677500000	3209300000	2729200000	2108900000	2993900000	4132400000	2721200000	MYLK	MYLK	CAMK	3191980000	2.98248e+09	0.934368	0.587686	no	0.9303	0.984373	0.964699	1.28181	0.838821	1.00543	0.855018	0.660687	0.937944	1.29462	0.852512	0.587686	no
TGFBR1	TGFR1	TKL	939260000	893840000	968470000	996080000	874160000	868900000	878790000	957380000	795400000	861520000	868270000	TGFBR1	TGFR1	TKL	934362000	871710000	0.932947	0.0740541	no	1.00524	0.956631	1.0365	1.06605	0.935569	0.929939	0.940524	1.02463	0.851276	0.922041	0.929265	0.0740541	no
KHK	KHK	Metabolic	21793000	21144000	23392000	24163000	21766000	26608000	19715000	22740000	16574000	22634000	16978000	KHK	KHK	Metabolic	22451600	2.08748e+07	0.92977	0.407666	no	0.970666	0.941759	1.04189	1.07623	0.969463	1.18513	0.878111	1.01285	0.73821	1.00812	0.756204	0.407666	no
MAPK15	MK15	CMGC	878330000	824610000	635960000	1062100000	424830000	637640000	568360000	680080000	668900000	976820000	732630000	MAPK15	MK15	CMGC	765166000	7.10738e+08	0.928868	0.653136	no	1.14789	1.07769	0.83114	1.38806	0.555213	0.833336	0.742793	0.888801	0.874189	1.27661	0.957479	0.653136	no
MAP3K3	M3K3	STE	361380000	304070000	322230000	300580000	328700000	317040000	265090000	302050000	272700000	313900000	330250000	MAP3K3	M3K3	STE	323392000	3.00172e+08	0.928198	0.162988	no	1.11747	0.940252	0.996407	0.92946	1.01641	0.980358	0.819717	0.934006	0.843249	0.970649	1.02121	0.162988	no
HK2	HXK2	Metabolic	41538000	56686000	55252000	49540000	42686000	52959000	43158000	48141000	42073000	56659000	30183000	HK2	HXK2	Metabolic	49140400	4.55288e+07	0.926505	0.494948	no	0.845292	1.15355	1.12437	1.00813	0.868654	1.07771	0.878259	0.979662	0.856179	1.153	0.61422	0.494948	no
AAK1	AAK1	Other	18347000000	15465000000	17282000000	15068000000	18141000000	16396000000	12726000000	16068000000	14360000000	16155000000	17906000000	AAK1	AAK1	Other	16860600000	1.56018e+10	0.925343	0.24779	no	1.08816	0.917227	1.02499	0.893681	1.07594	0.972445	0.754777	0.952991	0.85169	0.958151	1.062	0.24779	no
STK38L	ST38L	AGC	356150000	317420000	280310000	293880000	278170000	316610000	284390000	244690000	256530000	288750000	301010000	STK38L	ST38L	AGC	305186000	2.81997e+08	0.924016	0.227666	no	1.16699	1.04009	0.918489	0.962954	0.911477	1.03743	0.931858	0.801773	0.840569	0.946144	0.986317	0.227666	no
RIOK2	RIOK2	Atypical	2359000000	2738000000	2855400000	2344300000	2810400000	2727200000	2466500000	2474200000	2280100000	2129500000	2440900000	RIOK2	RIOK2	Atypical	2621420000	2.41973e+09	0.923062	0.172051	no	0.899894	1.04447	1.08926	0.894286	1.07209	1.04035	0.940902	0.94384	0.869796	0.812346	0.931137	0.172051	no
PI4K2B	P4K2B	Atypical	92525000	93574000	101160000	77053000	86160000	98034000	79649000	69386000	74779000	106930000	68711000	PI4K2B	P4K2B	Atypical	90094400	8.29148e+07	0.920311	0.396017	no	1.02698	1.03862	1.12282	0.855247	0.95633	1.08813	0.884062	0.770148	0.830007	1.18687	0.762656	0.396017	no
STK38	STK38	AGC	2784100000	2779300000	2930500000	2495100000	2434400000	2576200000	2198700000	2581800000	2351200000	2576600000	2536200000	STK38	STK38	AGC	2684680000	2.47012e+09	0.920079	0.0864238	no	1.03703	1.03524	1.09156	0.929385	0.906775	0.959593	0.81898	0.961679	0.875784	0.959742	0.944694	0.0864238	no
DYRK1A	DYR1A	CMGC	115020000	88807000	84820000	94660000	82512000	73382000	64825000	91936000	76918000	94777000	111730000	DYRK1A	DYR1A	CMGC	93163800	8.55947e+07	0.918755	0.439041	no	1.2346	0.953235	0.910439	1.01606	0.885666	0.787666	0.695817	0.986821	0.825621	1.01732	1.19929	0.439041	no
GRK6	GRK6	AGC	23555000	15005000	18036000	24585000	17970000	18062000	13827000	14889000	18680000	27480000	16130000	GRK6	GRK6	AGC	19830200	18178000	0.916683	0.564392	no	1.18783	0.756674	0.909522	1.23978	0.906194	0.910833	0.69727	0.750825	0.941998	1.38577	0.813406	0.564392	no
CSNK2A2	CSK22	Other	14208000000	12920000000	12302000000	12779000000	14345000000	13116000000	11591000000	11947000000	10290000000	12267000000	13722000000	CSNK2A2	CSK22	Other	13310800000	12155500000	0.913206	0.112005	no	1.0674	0.97064	0.924212	0.960047	1.0777	0.985365	0.870797	0.897542	0.773056	0.921582	1.03089	0.112005	no
MST4	MST4	STE	114980000	92117000	74560000	120850000	106570000	101360000	72830000	91837000	81674000	91417000	118190000	MST4	MST4	STE	101815400	9.28847e+07	0.912285	0.411387	no	1.1293	0.904745	0.732306	1.18695	1.0467	0.995527	0.715314	0.901995	0.802177	0.89787	1.16083	0.411387	no
CDK9	CDK9	CMGC	1842000000	1655900000	1384600000	1854200000	1585100000	1589400000	1427700000	1453300000	1230500000	1513500000	1895000000	CDK9	CDK9	CMGC	1664360000	1.51823e+09	0.912202	0.278731	no	1.10673	0.994917	0.831911	1.11406	0.952378	0.954962	0.857807	0.873188	0.739323	0.909359	1.13858	0.278731	no
MAP2K1	MP2K1	STE	14392000000	14707000000	16686000000	13451000000	18447000000	15489000000	13877000000	10479000000	13362000000	15823000000	15836000000	MAP2K1	MP2K1	STE	15536600000	1.41443e+10	0.910388	0.29061	no	0.926329	0.946604	1.07398	0.865762	1.18733	0.996936	0.893181	0.674472	0.860034	1.01843	1.01927	0.29061	no
VRK2	VRK2	CK1	126070000	84140000	114700000	119350000	102140000	118530000	87285000	101350000	90773000	100500000	98328000	VRK2	VRK2	CK1	109280000	99461000	0.910148	0.266854	no	1.15364	0.769949	1.0496	1.09215	0.934663	1.08464	0.798728	0.927434	0.830646	0.919656	0.89978	0.266854	no
MAP4K5	M4K5	STE	1495000000	1334100000	1387200000	1318900000	1303000000	1335300000	1220900000	1111400000	1035600000	1202300000	1560100000	MAP4K5	M4K5	STE	1367640000	1.24427e+09	0.909791	0.200524	no	1.09312	0.975476	1.0143	0.964362	0.952736	0.976353	0.892706	0.812641	0.757217	0.879106	1.14072	0.200524	no
PFKL	K6PL	Metabolic	21324000	20157000	16720000	20928000	19627000	22932000	21551000	14623000	15346000	16977000	16357000	PFKL	K6PL	Metabolic	19751200	1.79643e+07	0.909531	0.32512	no	1.07963	1.02055	0.846531	1.05958	0.993712	1.16104	1.09112	0.74036	0.776965	0.859543	0.828152	0.32512	no
LATS2	LATS2	AGC	21592000	19940000	23476000	20774000	18870000	16526000	18185000	23473000	15600000	19605000	20629000	LATS2	LATS2	AGC	20930400	19003000	0.907914	0.224265	no	1.03161	0.952681	1.12162	0.992528	0.901559	0.789569	0.868832	1.12148	0.745327	0.936676	0.9856	0.224265	no
ADK	ADK	Metabolic	1503600000	1614400000	1600600000	1504800000	1122700000	1339600000	1299200000	893820000	1272400000	1657700000	1521400000	ADK	ADK	Metabolic	1469220000	1.33069e+09	0.90571	0.35686	no	1.0234	1.09881	1.08942	1.02422	0.764147	0.911776	0.884279	0.608364	0.866038	1.12829	1.03552	0.35686	no
PGK1	PGK1	Metabolic	183220000	98739000	117320000	120020000	132920000	100720000	141330000	177230000	95213000	138520000	54911000	PGK1	PGK1	Metabolic	130443800	1.17987e+08	0.904507	0.606186	no	1.40459	0.756947	0.899391	0.92009	1.01898	0.772133	1.08346	1.35867	0.729916	1.06191	0.420955	0.606186	no
DAPK3	DAPK3	CAMK	385280000	367030000	393550000	338490000	400820000	343200000	329070000	238620000	329100000	410940000	395220000	DAPK3	DAPK3	CAMK	377034000	341025000	0.904494	0.250474	no	1.02187	0.973467	1.04381	0.89777	1.06309	0.910263	0.872786	0.632887	0.872866	1.08993	1.04823	0.250474	no
PRKAA2	AAPK2	CAMK	258560000	261140000	241290000	259310000	201460000	204220000	179690000	266700000	217710000	242200000	214940000	PRKAA2	AAPK2	CAMK	244352000	220910000	0.904065	0.202265	no	1.05815	1.0687	0.987469	1.06121	0.824466	0.835762	0.735374	1.09146	0.890969	0.991193	0.879633	0.202265	no
TNIK	TNIK	STE	188060000	106470000	110670000	142680000	101550000	88124000	99605000	141270000	96774000	117890000	160010000	TNIK	TNIK	STE	129886000	1.17279e+08	0.902937	0.53235	no	1.44789	0.819719	0.852055	1.0985	0.781839	0.678472	0.766865	1.08765	0.745069	0.907642	1.23193	0.53235	no
MAPK3	MK03	CMGC	3656700000	3810400000	3583200000	4010300000	3673600000	3461800000	2916600000	2889300000	3375600000	3454300000	4068000000	MAPK3	MK03	CMGC	3746840000	3.36093e+09	0.897005	0.0952814	no	0.975942	1.01696	0.956326	1.07032	0.980453	0.923925	0.778416	0.77113	0.900919	0.921924	1.08571	0.0952814	no
CDK18	CDK18	CMGC	27885000	29679000	32821000	41296000	39862000	27049000	51621000	19446000	34470000	22249000	29618000	CDK18	CDK18	CMGC	34308600	3.07422e+07	0.896048	0.549872	no	0.81277	0.86506	0.956641	1.20366	1.16187	0.788403	1.50461	0.566797	1.0047	0.648496	0.863282	0.549872	no
ATM	ATM	Atypical	88355000	84672000	95536000	60409000	58991000	72282000	57956000	93617000	59592000	63235000	70154000	ATM	ATM	Atypical	77592600	6.94727e+07	0.895352	0.390621	no	1.1387	1.09124	1.23125	0.778541	0.760266	0.931558	0.746927	1.20652	0.768011	0.814962	0.904133	0.390621	no
FN3K	FN3K	Metabolic	748300000	552290000	753240000	564000000	733370000	671220000	590090000	539030000	476090000	692620000	614690000	FN3K	FN3K	Metabolic	670240000	597290000	0.891158	0.219959	no	1.11647	0.824018	1.12384	0.84149	1.09419	1.00146	0.880416	0.804234	0.710328	1.03339	0.917119	0.219959	no
IKBKE	IKKE	Other	143320000	150400000	134850000	181390000	133500000	111180000	118810000	152680000	117920000	154960000	139230000	IKBKE	IKKE	Other	148692000	1.32463e+08	0.890857	0.197272	no	0.963872	1.01149	0.906908	1.2199	0.897829	0.74772	0.799034	1.02682	0.793049	1.04215	0.936365	0.197272	no
ACVR2A	AVR2A	TKL	40825000	32326000	29165000	49296000	19198000	27315000	34559000	35764000	27060000	32461000	25403000	ACVR2A	AVR2A	TKL	34162000	30427000	0.890668	0.476907	no	1.19504	0.946256	0.853726	1.44301	0.561969	0.799573	1.01162	1.04689	0.792108	0.950208	0.743604	0.476907	no
LATS1	LATS1	AGC	537620000	605840000	652350000	490760000	619260000	465380000	502970000	551230000	492000000	568000000	524300000	LATS1	LATS1	AGC	581166000	5.17313e+08	0.89013	0.0740357	no	0.925071	1.04246	1.12248	0.84444	1.06555	0.800769	0.86545	0.94849	0.846574	0.977346	0.902152	0.0740357	no
STK35	STK35	Other	100570000	96194000	120910000	91641000	108500000	101390000	89444000	79691000	97912000	94833000	89237000	STK35	STK35	Other	103563000	92084500	0.889164	0.0794497	no	0.9711	0.928845	1.1675	0.884882	1.04767	0.979018	0.863668	0.769493	0.945434	0.915703	0.861669	0.0794497	no
SRPK2	SRPK2	CMGC	75579000	47101000	38998000	47846000	34078000	36386000	33777000	51438000	47507000	38424000	52331000	SRPK2	SRPK2	CMGC	48720400	43310500	0.88896	0.486057	no	1.55128	0.966761	0.800445	0.982053	0.699461	0.746833	0.693282	1.05578	0.975095	0.788663	1.07411	0.486057	no
LIMK1	LIMK1	TKL	666420000	579870000	511910000	656190000	688660000	629670000	517880000	526820000	510730000	559330000	555840000	LIMK1	LIMK1	TKL	620610000	550045000	0.886297	0.078552	no	1.07381	0.934355	0.82485	1.05733	1.10965	1.0146	0.834469	0.848874	0.822948	0.901258	0.895635	0.078552	no
BMP2K	BMP2K	Other	6507400000	5765600000	5151600000	5918200000	5999100000	4539000000	4198700000	6222100000	4839600000	4990500000	6408300000	BMP2K	BMP2K	Other	5868380000	5199700000	0.886054	0.1753	no	1.10889	0.982486	0.877857	1.00849	1.02228	0.773467	0.715479	1.06028	0.824691	0.850405	1.092	0.1753	no
TEC	TEC	TK	1344800000	1264500000	1284200000	1305700000	1439200000	1122200000	957830000	1299200000	1087500000	1206700000	1359500000	TEC	TEC	TK	1327680000	1172155000	0.88286	0.0589634	no	1.01289	0.952413	0.967251	0.983445	1.084	0.845234	0.721431	0.978549	0.819098	0.908879	1.02397	0.0589634	no
FYN	FYN	TK	949070000	730860000	722200000	1226300000	756500000	904690000	656010000	932390000	570020000	726990000	821440000	FYN	FYN	TK	876986000	768590000	0.876399	0.343932	no	1.0822	0.833377	0.823502	1.39831	0.862614	1.03159	0.748028	1.06318	0.649976	0.828964	0.936663	0.343932	no
CSNK2A1	CSK21	Other	9949900000	8473100000	9136200000	9824300000	9559600000	9101100000	7334800000	10111000000	7854300000	6142100000	8729400000	CSNK2A1	CSK21	Other	9388620000	8.21212e+09	0.874688	0.116706	no	1.05978	0.902486	0.973114	1.04641	1.01821	0.969376	0.781244	1.07694	0.836577	0.654207	0.929785	0.116706	no
PRKAA1	AAPK1	CAMK	9157600000	9519900000	9282200000	8945200000	11297000000	7995400000	6960100000	7821900000	9764300000	8942100000	9053100000	PRKAA1	AAPK1	CAMK	9640380000	8.42282e+09	0.873702	0.0718963	no	0.949921	0.987503	0.962846	0.927889	1.17184	0.829366	0.721974	0.811368	1.01285	0.927567	0.939081	0.0718963	no
PTK6	PTK6	TK	742390000	614770000	598510000	583140000	499320000	572450000	533910000	609840000	427080000	496320000	519960000	PTK6	PTK6	TK	607626000	5.26593e+08	0.866641	0.107893	no	1.22179	1.01176	0.984997	0.959702	0.821755	0.942109	0.878682	1.00364	0.702867	0.816818	0.855724	0.107893	no
MAP3K4	M3K4	STE	136130000	180390000	151690000	113380000	87603000	85504000	93275000	169370000	110650000	101960000	128950000	MAP3K4	M3K4	STE	133838600	114951500	0.858882	0.36756	no	1.01712	1.34782	1.13338	0.84714	0.654542	0.638859	0.696922	1.26548	0.826742	0.761813	0.963474	0.36756	no
PRKDC	PRKDC	Atypical	7361400000	5935300000	6598600000	4603700000	3851500000	4322600000	4365800000	6019900000	4859000000	5065600000	4545600000	PRKDC	PRKDC	Atypical	5670100000	4.86308e+09	0.857672	0.243377	no	1.29828	1.04677	1.16375	0.811926	0.679265	0.76235	0.769969	1.06169	0.856951	0.893388	0.801679	0.243377	no
CSNK1G2	KC1G2	CK1	123730000	100450000	123200000	103020000	117870000	117720000	89737000	104120000	76398000	106140000	87943000	CSNK1G2	KC1G2	CK1	113654000	9.70097e+07	0.853553	0.0707993	no	1.08866	0.883823	1.08399	0.906435	1.0371	1.03578	0.789563	0.916114	0.672198	0.933887	0.773778	0.0707993	no
TP53RK	PRPK	Other	3783200000	2630100000	2357700000	2685500000	2608400000	3090800000	2741900000	2142400000	1835800000	2467500000	2095600000	TP53RK	PRPK	Other	2812980000	2.39567e+09	0.851647	0.207362	no	1.34491	0.934987	0.83815	0.954682	0.927273	1.09876	0.974731	0.761612	0.652618	0.877184	0.744975	0.207362	no
IKBKB	IKKB	Other	210360000	157640000	315870000	227060000	411040000	260260000	193190000	159550000	198820000	284520000	245840000	IKBKB	IKKB	Other	264394000	2.23697e+08	0.846073	0.395444	no	0.795631	0.596231	1.19469	0.858794	1.55465	0.984364	0.73069	0.603455	0.751984	1.07612	0.929824	0.395444	no
PKM	KPYM	Metabolic	352570000	214610000	251430000	300080000	188070000	217200000	218130000	340230000	197730000	207450000	145100000	PKM	KPYM	Metabolic	261352000	2.20973e+08	0.845501	0.332765	no	1.34902	0.821153	0.962036	1.14818	0.719604	0.831063	0.834622	1.30181	0.756566	0.793757	0.55519	0.332765	no
DMPK	DMPK	AGC	35011000	47511000	46783000	31228000	33175000	31468000	30939000	39299000	29367000	30120000	34847000	DMPK	DMPK	AGC	38741600	3.26733e+07	0.843366	0.123718	no	0.903706	1.22636	1.20756	0.806059	0.856315	0.812253	0.798599	1.01439	0.758022	0.777459	0.899472	0.123718	no
BRAF	BRAF	TKL	77355000	102540000	126310000	153160000	119450000	97326000	97529000	120400000	102730000	86529000	80959000	BRAF	BRAF	TKL	115763000	9.75788e+07	0.842919	0.193956	no	0.668219	0.885775	1.09111	1.32305	1.03185	0.840735	0.842489	1.04006	0.887417	0.747467	0.699351	0.193956	no
LYN	LYN	TK	5657000000	4852900000	4441200000	6436300000	6633200000	5121000000	4181400000	5117000000	4163900000	3944300000	5701000000	LYN	LYN	TK	5604120000	4.70477e+09	0.839519	0.105976	no	1.00944	0.865952	0.792488	1.14849	1.18363	0.913792	0.74613	0.913078	0.743007	0.703821	1.01729	0.105976	no
RPS6KA4	KS6A4	AGC	969280000	1414500000	1088900000	1003400000	1089900000	866200000	830990000	985630000	913440000	974920000	1035700000	RPS6KA4	KS6A4	AGC	1113196000	934480000	0.839457	0.0510872	no	0.870718	1.27067	0.978175	0.901369	0.979073	0.77812	0.74649	0.885406	0.820556	0.875785	0.930384	0.0510872	no
CSK	CSK	TK	14015000000	12826000000	13567000000	20093000000	17973000000	13305000000	13423000000	14212000000	11575000000	12841000000	13428000000	CSK	CSK	TK	15694800000	1.31307e+10	0.836625	0.0877102	no	0.892971	0.817213	0.864426	1.28023	1.14516	0.847733	0.855251	0.905523	0.737505	0.818169	0.85557	0.0877102	no
ULK3	ULK3	Other	749960000	763450000	609330000	1067300000	685900000	689090000	653890000	679050000	513220000	638980000	702320000	ULK3	ULK3	Other	775188000	6.46092e+08	0.833464	0.127847	no	0.967456	0.984858	0.786042	1.37683	0.884818	0.888933	0.843524	0.875981	0.662059	0.82429	0.906	0.127847	no
PRKCB	KPCB	AGC	126930000	86804000	104180000	205760000	87651000	79420000	103930000	83901000	72679000	132430000	136710000	PRKCB	KPCB	AGC	122265000	1.01512e+08	0.830259	0.400992	no	1.03815	0.709966	0.852084	1.6829	0.716894	0.649573	0.850039	0.686223	0.594438	1.08314	1.11815	0.400992	no
ACVR1B	ACV1B	TKL	164050000	112310000	127680000	202770000	92736000	101750000	129760000	120870000	104850000	102520000	134970000	ACVR1B	ACV1B	TKL	139909200	1.15787e+08	0.827584	0.233414	no	1.17255	0.802735	0.912592	1.4493	0.66283	0.727257	0.927459	0.863917	0.749415	0.732761	0.964697	0.233414	no
JAK1	JAK1	TK	1522500000	2258700000	1913500000	1283700000	1374600000	984350000	1349200000	1273100000	1415800000	1751100000	1506100000	JAK1	JAK1	TK	1670600000	1.37994e+09	0.826016	0.181323	no	0.911349	1.35203	1.1454	0.768407	0.822818	0.589219	0.807614	0.762062	0.84748	1.04819	0.901532	0.181323	no
OXSR1	OXSR1	STE	78983000	85233000	93386000	81876000	100850000	95379000	87930000	53753000	66493000	75518000	56806000	OXSR1	OXSR1	STE	88065600	72646500	0.824913	0.0990171	no	0.896866	0.967835	1.06041	0.929716	1.14517	1.08304	0.99846	0.610375	0.755039	0.85752	0.645042	0.0990171	no
MTOR	MTOR	Atypical	691370000	625670000	609370000	554800000	386360000	462810000	406540000	645540000	415430000	449490000	457310000	MTOR	MTOR	Atypical	573514000	4.72853e+08	0.824484	0.133946	no	1.2055	1.09094	1.06252	0.96737	0.673671	0.806972	0.708858	1.12559	0.724359	0.783747	0.797382	0.133946	no
NEK3	NEK3	NEK	122690000	139240000	148360000	90049000	100020000	95478000	94623000	99650000	86857000	106000000	98741000	NEK3	NEK3	NEK	120071800	96891500	0.806946	0.053697	no	1.02181	1.15964	1.23559	0.74996	0.833002	0.795174	0.788053	0.82992	0.723376	0.882805	0.82235	0.053697	no
MAP2K4	MP2K4	STE	2397000000	2179200000	2014500000	2199300000	2340400000	2470400000	2249400000	549600000	1615400000	1821000000	2047500000	MAP2K4	MP2K4	STE	2226080000	1.79222e+09	0.8051	0.198703	no	1.07678	0.978941	0.904954	0.98797	1.05135	1.10975	1.01048	0.246891	0.72567	0.81803	0.919778	0.198703	no
NUAK2	NUAK2	CAMK	6298400	5607400	6992100	19182000	6359400	7124800	7663200	5904300	5206300	5679300	10994000	NUAK2	NUAK2	CAMK	8887860	7.09532e+06	0.798316	0.494991	no	0.708652	0.630906	0.786702	2.15822	0.715515	0.801633	0.86221	0.664311	0.585777	0.638995	1.23697	0.494991	no
TESK1	TESK1	TKL	24496000	24793000	29326000	51445000	40003000	28186000	32083000	33340000	25447000	24724000	18091000	TESK1	TESK1	TKL	34012600	26978500	0.793191	0.217806	no	0.720204	0.728936	0.86221	1.51253	1.17612	0.828693	0.943268	0.980225	0.748164	0.726907	0.531891	0.217806	no
CHUK	IKKA	Other	39691000	37922000	60629000	47106000	54347000	31879000	27002000	29450000	51805000	53138000	34370000	CHUK	IKKA	Other	47939000	3.79407e+07	0.791436	0.158117	no	0.827948	0.791047	1.26471	0.982624	1.13367	0.664991	0.563257	0.614322	1.08064	1.10845	0.716953	0.158117	no
BMX	BMX	TK	29986000	37026000	22586000	30165000	19097000	24447000	20197000	25325000	20920000	24428000	15391000	BMX	BMX	TK	27772000	2.17847e+07	0.784411	0.10406	no	1.07972	1.33321	0.813265	1.08617	0.687635	0.880275	0.727243	0.91189	0.753277	0.879591	0.554191	0.10406	no
FES	FES	TK	527440000	401680000	315290000	733230000	552900000	345390000	376710000	407800000	361860000	448930000	427560000	FES	FES	TK	506108000	3.94708e+08	0.77989	0.129798	no	1.04215	0.793665	0.62297	1.44876	1.09245	0.682443	0.744327	0.805757	0.714986	0.887024	0.8448	0.129798	no
MAPK6	MK06	CMGC	33743000	25076000	20929000	25145000	20379000	21278000	18728000	27235000	13214000	19153000	16668000	MAPK6	MK06	CMGC	25054400	1.93793e+07	0.77349	0.0939691	no	1.34679	1.00086	0.835342	1.00362	0.81339	0.849272	0.747493	1.08703	0.527412	0.764457	0.665272	0.0939691	no
DAPK2	DAPK2	CAMK	31156000	19790000	18458000	37999000	23404000	18647000	24922000	12518000	20175000	23131000	19155000	DAPK2	DAPK2	CAMK	26161400	19758000	0.755235	0.131105	no	1.19091	0.756458	0.705543	1.45248	0.8946	0.712768	0.952625	0.478491	0.771174	0.884165	0.732186	0.131105	no
SYK	KSYK	TK	1795800000	1497400000	1273100000	3603000000	1874900000	1232200000	1405700000	1432700000	1476700000	1797800000	1744700000	SYK	KSYK	TK	2008840000	1.51497e+09	0.75415	0.231746	no	0.893949	0.745405	0.633749	1.79357	0.933325	0.613389	0.699757	0.713198	0.735101	0.894944	0.868511	0.231746	no
CSF1R	CSF1R	TK	252520000	204240000	201130000	513220000	385130000	200580000	243160000	197520000	208450000	285700000	217590000	CSF1R	CSF1R	TK	311248000	225500000	0.724503	0.164887	no	0.811314	0.656197	0.646205	1.64891	1.23737	0.644438	0.781242	0.634606	0.669723	0.917918	0.699089	0.164887	no
FGR	FGR	TK	435270000	303110000	297140000	925200000	397270000	283690000	324650000	311460000	336420000	315050000	416430000	FGR	FGR	TK	471598000	3.31283e+08	0.70247	0.222692	no	0.922968	0.64273	0.630071	1.96184	0.842391	0.60155	0.688404	0.660435	0.713362	0.668048	0.883019	0.222692	no
PRKCQ	KPCT	AGC	145380000	82985000	60126000	145070000	93954000	37608000	61844000	93549000	52488000	94461000	93386000	PRKCQ	KPCT	AGC	105503000	7.22227e+07	0.684556	0.115294	no	1.37797	0.786565	0.569898	1.37503	0.890534	0.356464	0.586182	0.886695	0.497502	0.895339	0.88515	0.115294	no
RPS6KA2	KS6A2	AGC	28670000	29252000	26789000	54388000	30323000	19517000	21677000	31977000	20295000	19507000	21976000	RPS6KA2	KS6A2	AGC	33884400	22491500	0.663772	0.0534305	no	0.846112	0.863288	0.7906	1.6051	0.894896	0.575988	0.639734	0.943709	0.598948	0.575693	0.648558	0.0534305	no
RPS6KA1	KS6A1	AGC	280330000	304400000	26640000	203590000	114210000	103900000	100500000	166130000	149600000	22706000	156200000	RPS6KA1	KS6A1	AGC	185834000	116506000	0.626936	0.220711	no	1.5085	1.63802	0.143354	1.09555	0.614581	0.559101	0.540805	0.89397	0.80502	0.122184	0.840535	0.220711	no
MAP4K1	M4K1	STE	30705000	26948000	35608000	103800000	77284000	24924000	35122000	26825000	21604000	41001000	31588000	MAP4K1	M4K1	STE	54869000	3.01773e+07	0.549989	0.114063	no	0.559606	0.491133	0.648964	1.89178	1.40852	0.454246	0.640106	0.488892	0.393738	0.747253	0.575698	0.114063	no
LCK	LCK	TK	521580000	220520000	242360000	1570700000	822060000	231180000	412050000	144860000	164170000	652800000	326310000	LCK	LCK	TK	675444000	321895000	0.476568	0.176104	no	0.772203	0.326482	0.358816	2.32543	1.21707	0.342264	0.610043	0.214466	0.243055	0.966475	0.483104	0.176104	no
