# Supplementary material for: Limited inhibition of multiple nodes in a driver network blocks metastasis
Source: eLife. 2021 May 11;10:e59696. doi: 10.7554/eLife.59696 (PMC8128439; doi:10.7554/eLife.59696)
Supplement: Figure 3—source data 1. [file elife-59696-fig3-data1.xlsx]

## Sheet: Fig. 3A,B
	NOTE:
	For the source data used in generating Figure 3A and B, please see Figure 2 - source data 1 as it contains the raw and processed values for the same MIB-MS data used in this Figure.

## Sheet: Fig. 3D
	NOTE:	Relative invasion calculated by
		(1)scaling every raw value within an experiment to the average signal from all the technical replicates within the Control group (which is set to 1)
		(2) averaging scaled values from all the technical replicates within each group per experiment (all groups are relative to 1)
		BM1 cell line				MB436 cell line				M6C cell line
	Independent experiment #	Control	4D-MAPKi		Independent experiment #	Control	4D-MAPKi		Independent experiment #	Control	4D-MAPKi
	1	1	0.169579		1	1	0.381891		1	1	0.098171
	2	1	0.562769		2	1	0.667521		2	1	0.290813
	3	1	0.15617		3	1	0.630529		3	1	0.418422
	4	1	0.309979

## Sheet: Fig. 3E
	NOTE:	Relative proliferation calculated by
		(1) converting the raw values from each time point to indicate relative confluence with respect to the initial confluence within a well
		(2) averaging relative confluence values from all the technical replicate wells per experimental group (4D-MAPKi vs DMSO) within an experiment
		BM1 cell line								MB436 cell line
		4DMAPKi			DMSO					4DMAPKi				DMSO
	Time elapsed (hours)	Experiment #1	Experiment #2	Experiment #3	Experiment #1	Experiment #2	Experiment #3		Time elapsed (hours)	Experiment #1	Experiment #2	Experiment #3	Experiment #4	Experiment #1	Experiment #2	Experiment #3	Experiment #4
	0	1	1	1	1	1	1		0	1	1	1	1	1	1	1	1
	24	2.08356		1.57778	2.12826		1.92213		12	1.2407		1.12199	1.23598	1.2059		1.16581	1.17566
	36	2.6661	1.84889	1.83163	2.65247	1.95878	2.26655		24	1.40115	1.6285		1.37164	1.38064	1.65699		1.37041
	48	3.33772	2.3235	2.2027	3.31853	2.40707	2.77793		36	1.50065	1.86849	1.37237	1.4335	1.49691	2.0011	1.46353	1.46812
	60	4.14164		2.70833	4.12449		3.3593		48	1.60349	2.12564		1.49668	1.61446	2.3604		1.58944
	72	4.90756	3.17812	3.32037	4.89582	3.20159	4.09755		60	1.71658	2.37166		1.56387	1.74251	2.73794		1.71489
									72	1.805	2.64543	1.71882	1.67842	1.81039	3.12789	1.82486	1.86473
		M6C cell line
		4DMAPKi			DMSO
	Time elapsed (hours)	Experiment #1	Experiment #2	Experiment #3	Experiment #1	Experiment #2	Experiment #3
	0	1	1	1	1	1	1
	24	1.26149		1.39831	1.73102		1.55685
	36	1.26105	0.912527	1.36445	1.90709	1.09844	1.55572
	48	1.28295	0.887335	1.32403	2.08339	1.09972	1.53823
	60	1.32651		1.29428	2.23158		1.55412
	72	1.38416	0.863777	1.30307	2.35756	1.07229	1.56

## Sheet: Fig. 3F
	NOTE:	Relative proliferation calculated by
		(1) converting the raw values from each time point to indicate relative confluence with respect to the initial confluence within a well
		(2) averaging relative confluence values from all the technical replicate wells per experimental group (4D-MAPKi vs DMSO) within an experiment
		MCF10A cell line
		4DMAPKi			DMSO
	Time elapsed (hours)	Experiment #1	Experiment #2	Experiment #3	Experiment #1	Experiment #2	Experiment #3
	0	1	1	1	1	1	1
	12	1.08877	1.15781	1.06096	1.05445	1.0984	0.969921
	24	1.05824	1.19951	1.11934	1.09702	1.21478	0.991507
	36	1.01823	1.17512	1.13633	1.06019	1.15736	0.982825
	48	0.940847	1.1488	1.11871	1.00579	1.10914	0.975989
	60	0.866732	1.13162	1.08989	0.983975	1.06709	0.967263
	72	0.822653	1.13455	1.05234	0.981521	1.0455	0.961809
		MCF10A cell line
		4DMAPKi			DMSO
	Time elapsed (hours)	Experiment #1	Experiment #2	Experiment #3	Experiment #1	Experiment #2	Experiment #3
	0	1	1	1	1	1	1
	12	1.07949	1.23364	0.869071	1.0212	1.04457	0.847456
	24	1.05227	1.29556	0.864965	0.958875	0.967557	0.836029
	36	1.04782	1.26621	0.887542	0.862953	0.854609	0.852174
	48	1.0296	1.23653	0.958116	0.741755	0.724989	0.904096
	60	0.988505	1.17624	1.02354	0.652161	0.651478	0.959421
	72	0.933193	1.11704	1.07195	0.599297	0.652343	0.970902
