# Supplementary material for: Limited inhibition of multiple nodes in a driver network blocks metastasis
Source: eLife. 2021 May 11;10:e59696. doi: 10.7554/eLife.59696 (PMC8128439; doi:10.7554/eLife.59696)
Supplement: Figure 3—source data 3. [file elife-59696-fig3-data3.xlsx]

## Sheet: Assay1
JNKi (%Invaded)
Elapsed (hours)	DMSO						no EGF						JNKi 1uM						JNKi 10uM						JNKi 25uM
0	4.27408	1.91781	2.83086	2.32733	2.77154	1.01818	3.81792	3.02178	1.71642	2.19081	2.21543	2.54934	2.3494	0.827653	1.68116				1.10159	0.58651	0.771513				1.26103	1.34983	2.67346
4.03333	1.59817	2.06259	1.03627	2.48397	1.45513	1.24224	1.7101	0.867679	0.76746	0.514706	0.856031	0.595238	1.19435	1.47139	1.37287				0.981079	0.194805	0.794621				0.66568	0.330688	0.676183
8	2.08012	2.3842	1.75824	3.52423	1.55738	2.02634	1.53322	1.03164	1.05342	1.4936	1.32353	0.488202	0.934094	1.40772	1.83534				1.12657	0.733333	1.18602				0.706991	0.401338	0.311042
12	1.89394	2.64201	3.03448	4.03683	2.25681	3.29341	2.20183	1.15804	0.650759	1.73565	1.2894	1.16099	0.765697	1.61943	2.28079				1.68124	0.854701	1.87538				0.394322	0.343171	0.244101
17.4833	3.07802	4.10876	4.24685	5.98569	3.69532	5.11945	1.61117	1.18812	1.28205	2.44208	1.73333	1.66065	1.49039	1.99147	4.1168				2.22222	1.51316	2.63789				1	0.723589	0.8285
20.35	2.76596	4.80938	4.49006	6.22929	4.31548	6.43599	1.96078	1.48387	2.36646	3.29268	1.69051	2.13523	2.213	1.96813	4.782				2.82895	1.33601	3.07414				0.832639	0.529101	0.334169
24	2.49494	5.18018	5.06098	8.22264	4.12446	7.59919	3.41615	1.67095	2.19561	2.90206	1.75769	2.92887	2.87899	2.30874	5.66636				3.57591	1.95823	2.88809				1.19048	0.615385	0.345125
28.0333	2.68199	5.54649	5.18783	9.23356	5.25947	8.53659	2.8971	1.90301	2.48042	2.78766	2.23661	3.25581	3.01205	2.9877	7.27903				3.35718	2.37942	3.18103				1.62116	0.691776	0.779221
32	2.56567	6.2919	6.13739	10.7104	6.19174	8.67124	3.7037	2.18289	2.50918	2.86678	2.55102	3.10881	3.16302	3.82401	7.65709				3.69979	2.08062	4.05634				1.5561	1.39752	0.431779
36	2.76976	7.05374	6.83396	11.7798	6.51629	9.53757	3.10835	2.88514	2.45184	4.00633	3.28216	4.00729	3.82142	3.77579	8.05632				3.89479	2.21519	4.2518				2.07125	1.52091	0.26087
41.4833	3.63144	6.895	7.71108	12.4763	6.42857	11.4595	4.47761	2.66064	3.15389	4.42392	4.10959	5.09804	4.29512	5.09276	9.27273				4.12221	1.83936	5.44323				1.87406	1.2715	0.670578
44.35	3.86572	7.95909	8.66511	12.8449	6.80307	12.5324	3.67535	2.73775	3.53003	4.57303	3.62012	5.10148	5.08872	5.44123	9.45101				4.10034	2.11225	5.48437				1.76471	1.71642	0.496689
48	2.79424	6.97324	7.51708	12.5883	6.36523	11.2839	4.60081	3.01489	2.98329	4.63306	3.94786	4.74096	4.3771	4.3901	8.87439				4.31177	2.64447	4.9639				1.7132	1.86335	0.423131
52.0333	2.77361	7.77004	7.31268	13.1969	6.92607	11.2754	4.7001	3.0426	3.46886	4.65116	4.62671	5.29197	4.64043	4.91976	9.7274				4.42834	2.40447	4.68685				1.90476	1.5891	0.696864
56	3.58537	7.64608	7.61839	14.3951	7.05441	11.8211	4.56682	3.41853	3.20893	5.26143	4.69006	5.6997	5.07872	5.31352	9.86107				4.17633	2.70499	5.32				1.91415	1.61111	0.412655
60	3.09997	8.05476	7.70231	14.575	7.35558	12.2283	4.54121	3.51196	3.53841	5.35606	5.14548	6.01685	5.55423	5.73248	9.96635				4.98883	2.2932	5.40023				1.94461	1.48487	0.284698
65.4833	3.37662	7.96356	8.26446	14.7432	8.12925	13.7392	4.90281	3.809	3.65243	6.10457	5.87906	6.54958	5.71114	5.94344	10.3989				4.79085	2.27182	5.27489				2.11765	1.68824	0.344353
68.35	3.51101	8.47554	7.53404	14.9318	7.67204	13.8133	4.59705	4.10743	3.67128	5.80369	6.05411	6.50636	5.80536	6.17628	10.6061				4.88066	2.45545	5.28634				1.97674	1.9685	0.481431
72	3.64535	8.75576	7.95787	15.1593	8.28327	13.6377	4.57534	4.13223	3.95616	6.12455	6.26427	6.86339	6.09682	6.41104	10.6476				5.0818	2.82756	5.51378				2.06246	1.45658	0.55788
JNKi (Total)
Elapsed (hours)	DMSO						no EGF						JNKi 1uM						JNKi 10uM						JNKi 25uM
0	1474	1460	1413	1332	1335	1375	1362	1423	1340	1415	1309	1216	1660	2054	1725				1634	1705	1685				1586	1778	1571
4.03333	1314	1406	1351	1248	1237	1288	1228	1383	1303	1360	1285	1176	1842	1835	1821				1427	1540	1636				1352	1512	1331
8	1298	1468	1365	1362	1220	987	1174	1454	1329	1406	1360	1229	1927	1918	1907				1509	1500	1602				1273	1495	1286
12	1320	1514	1450	1412	1285	1336	1090	1468	1383	1498	1396	1292	1959	1976	1973				1487	1521	1653				1268	1457	1229
17.4833	1397	1655	1507	1537	1326	1465	931	1515	1404	1597	1500	1385	2080	2109	2089				1485	1520	1668				1200	1382	1207
20.35	1410	1705	1559	1509	1344	1445	918	1550	1479	1640	1538	1405	2169	2134	2133				1520	1497	1659				1201	1323	1197
24	1483	1776	1640	1581	1382	1487	966	1556	1503	1654	1593	1434	2223	2209	2206				1594	1532	1662				1176	1300	1159
28.0333	1566	1839	1677	1657	1426	1558	1001	1629	1532	1686	1699	1505	2324	2276	2308				1817	1555	1729				1172	1301	1155
32	1637	1939	1776	1830	1502	1603	1080	1695	1634	1779	1764	1544	2466	2432	2403				1892	1538	1775				1221	1288	1158
36	1733	2084	1873	1944	1596	1730	1126	1837	1713	1897	1889	1647	2643	2569	2557				1977	1580	1811				1207	1315	1150
41.4833	1845	2219	2049	2108	1820	1850	1273	1992	1839	2057	2044	1785	2887	2749	2750				2062	1631	1929				1334	1337	1193
44.35	1966	2249	2135	2211	1955	1931	1306	2082	1898	2143	2127	1823	2987	2867	2878				2073	1657	1951				1360	1340	1208
48	2362	2653	2634	2407	2278	2508	2217	2753	2514	2698	2685	2046	3267	3394	3065				2412	2042	2216				1576	1610	1418
52.0333	2668	2870	2776	2493	2570	2705	2851	2958	2681	2838	2853	2192	3685	3801	3485				2484	2329	2411				1680	1762	1435
56	2817	2995	2914	2612	2665	2817	2978	3130	2867	3041	3049	2351	3938	3971	3671				2586	2366	2500				1724	1800	1454
60	2871	3141	3077	2765	2787	2944	3215	3303	3137	3286	3265	2493	4177	4239	3863				2686	2442	2611				1697	1751	1405
65.4833	3080	3403	3267	2998	2940	3137	3447	3623	3395	3653	3572	2733	4535	4526	4212				2797	2509	2692				1700	1777	1452
68.35	3133	3516	3305	3007	3037	3236	3524	3798	3541	3739	3733	2828	4737	4663	4356				2807	2525	2724				1720	1778	1454
72	3237	3689	3418	3107	3163	3417	3650	3993	3741	3886	3943	3016	4937	4929	4555				2873	2511	2793				1697	1785	1434
JNKi (%Invaded)	72 hours
	DMSO	no EGF	JNKi 1uM	JNKi 10uM	JNKi 25uM		DMSO	no EGF	JNKi 1uM	JNKi 10uM	JNKi 25uM
	3.64535	4.57534	6.09682	5.0818	2.06246		0.380787	0.477932	0.636863	0.530835	0.215441
	8.75576	4.13223	6.41104	2.82756	1.45658		0.914611	0.431645	0.669685	0.295362	0.152152
	7.95787	3.95616	10.6476	5.51378	0.55788		0.831264	0.413253	1.11223	0.57596	0.0582751
	15.1593	6.12455					1.58351	0.639759
	8.28327	6.26427					0.865256	0.654354
	13.6377	6.86339					1.42457	0.716938
	9.57321
JNKi (Total)	72 hours
	DMSO	no EGF	JNKi 1uM	JNKi 10uM	JNKi 25uM		DMSO	no EGF	JNKi 1uM	JNKi 10uM	JNKi 25uM
	3237	3650	4937	2873	1697		0.969597	1.09331	1.47881	0.860566	0.508312
	3689	3993	4929	2511	1785		1.10499	1.19605	1.47641	0.752134	0.534671
	3418	3741	4555	2793	1434		1.02381	1.12056	1.36439	0.836603	0.429534
	3107	3886					0.930657	1.164
	3163	3943					0.947431	1.18107
	3417	3016					1.02351	0.9034
	3338.5
p38i (%Invaded)
Elapsed (hours)	DMSO						no EGF						p38i 1uM						p38i 10uM						p38i 25uM
0	4.27408	1.91781	2.83086	2.32733	2.77154	1.01818	3.81792	3.02178	1.71642	2.19081	2.21543	2.54934	0.731261	0.296384	1.75219				0.813953	1.00105	2.0214				2.09832	2.15698	1.43184
4.03333	1.59817	2.06259	1.03627	2.48397	1.45513	1.24224	1.7101	0.867679	0.76746	0.514706	0.856031	0.595238	1.10787	0.552826	1.15473				0.349243	1.58807	0.572155				0.520059	0.448143	0.488865
8	2.08012	2.3842	1.75824	3.52423	1.55738	2.02634	1.53322	1.03164	1.05342	1.4936	1.32353	0.488202	1.33185	0.792683	0.73157				0.722624	1.97701	1.05068				0.514469	0.901481	0.516262
12	1.89394	2.64201	3.03448	4.03683	2.25681	3.29341	2.20183	1.15804	0.650759	1.73565	1.2894	1.16099	2.07447	1.02781	1.76				0.757193	2.78285	1.23762				0.761905	0.902062	0.657562
17.4833	3.07802	4.10876	4.24685	5.98569	3.69532	5.11945	1.61117	1.18812	1.28205	2.44208	1.73333	1.66065	3.36853	1.63666	1.6608				1.33597	3.66332	1.65848				0.753296	0.7242	0.946215
20.35	2.76596	4.80938	4.49006	6.22929	4.31548	6.43599	1.96078	1.48387	2.36646	3.29268	1.69051	2.13523	3.35707	2.47108	2.60293				1.52785	4.32363	2.35507				0.994406	1.05524	1.23274
24	2.49494	5.18018	5.06098	8.22264	4.12446	7.59919	3.41615	1.67095	2.19561	2.90206	1.75769	2.92887	4.06386	2.2449	2.75862				1.61982	4.4335	2.61398				1.15924	1.4997	1.3739
28.0333	2.68199	5.54649	5.18783	9.23356	5.25947	8.53659	2.8971	1.90301	2.48042	2.78766	2.23661	3.25581	4.86078	2.83688	2.89791				1.92484	4.84375	3.23529				1.0113	1.21376	1.44998
32	2.56567	6.2919	6.13739	10.7104	6.19174	8.67124	3.7037	2.18289	2.50918	2.86678	2.55102	3.10881	5.43672	3.01869	2.94872				2.3019	5.51621	3.55932				1.38504	2.16908	1.67209
36	2.76976	7.05374	6.83396	11.7798	6.51629	9.53757	3.10835	2.88514	2.45184	4.00633	3.28216	4.00729	6.52174	3.6465	3.64437				2.45298	5.58875	3.82263				1.10775	1.93354	1.98063
41.4833	3.63144	6.895	7.71108	12.4763	6.42857	11.4595	4.47761	2.66064	3.15389	4.42392	4.10959	5.09804	6.61218	4.33735	4.11985				3.80558	6.51466	4.3152				1.29211	1.53089	1.74257
44.35	3.86572	7.95909	8.66511	12.8449	6.80307	12.5324	3.67535	2.73775	3.53003	4.57303	3.62012	5.10148	6.51629	4.33437	4.60695				3.45958	6.13787	4.47427				1.80617	1.69402	1.67428
48	2.79424	6.97324	7.51708	12.5883	6.36523	11.2839	4.60081	3.01489	2.98329	4.63306	3.94786	4.74096	6.73225	5.03303	4.66558				3.50161	6.32575	4.48198				1.18969	1.69668	1.67334
52.0333	2.77361	7.77004	7.31268	13.1969	6.92607	11.2754	4.7001	3.0426	3.46886	4.65116	4.62671	5.29197	6.68827	5.06366	4.68933				3.76535	6.04289	4.57476				1.5649	1.33789	1.60519
56	3.58537	7.64608	7.61839	14.3951	7.05441	11.8211	4.56682	3.41853	3.20893	5.26143	4.69006	5.6997	7.13684	5.69723	5.18376				4.15252	6.38242	4.46846				1.34779	1.52381	1.99165
60	3.09997	8.05476	7.70231	14.575	7.35558	12.2283	4.54121	3.51196	3.53841	5.35606	5.14548	6.01685	7.4203	5.41709	5.03559				4.08904	6.51466	4.41623				1.49007	1.49065	1.90045
65.4833	3.37662	7.96356	8.26446	14.7432	8.12925	13.7392	4.90281	3.809	3.65243	6.10457	5.87906	6.54958	7.54289	5.6872	6.13587				4.14162	7.08134	4.64992				1.4786	1.83185	1.82544
68.35	3.51101	8.47554	7.53404	14.9318	7.67204	13.8133	4.59705	4.10743	3.67128	5.80369	6.05411	6.50636	7.64921	6.0339	5.372				4.17563	6.69145	4.74443				1.47059	1.72374	1.76966
72	3.64535	8.75576	7.95787	15.1593	8.28327	13.6377	4.57534	4.13223	3.95616	6.12455	6.26427	6.86339	7.38095	6.18935	6.02877				4.15437	7.13957	4.63321				1.61884	1.61576	1.77839
p38i (Total)
Elapsed (hours)	DMSO						no EGF						p38i 1uM						p38i 10uM						p38i 25uM
0	1474	1460	1413	1332	1335	1375	1362	1423	1340	1415	1309	1216	1641	1687	1598				1720	1898	1682				1668	1669	1746
4.03333	1314	1406	1351	1248	1237	1288	1228	1383	1303	1360	1285	1176	1715	1628	1732				1718	2078	1573				1346	1562	1841
8	1298	1468	1365	1362	1220	987	1174	1454	1329	1406	1360	1229	1802	1640	1777				1799	2175	1618				1555	1553	1937
12	1320	1514	1450	1412	1285	1336	1090	1468	1383	1498	1396	1292	1880	1654	1875				1981	2192	1616				1575	1552	1977
17.4833	1397	1655	1507	1537	1326	1465	931	1515	1404	1597	1500	1385	1989	1833	1987				2021	2293	1628				1593	1657	2008
20.35	1410	1705	1559	1509	1344	1445	918	1550	1479	1640	1538	1405	1966	1902	2113				2029	2336	1656				1609	1611	2028
24	1483	1776	1640	1581	1382	1487	966	1556	1503	1654	1593	1434	2067	1960	2175				2099	2436	1645				1639	1667	2038
28.0333	1566	1839	1677	1657	1426	1558	1001	1629	1532	1686	1699	1505	2119	1974	2243				2182	2560	1700				1681	1483	2069
32	1637	1939	1776	1830	1502	1603	1080	1695	1634	1779	1764	1544	2244	2087	2340				2259	2683	1770				1805	1798	2153
36	1733	2084	1873	1944	1596	1730	1126	1837	1713	1897	1889	1647	2392	2331	2497				2446	2845	1962				1986	1655	2272
41.4833	1845	2219	2049	2108	1820	1850	1273	1992	1839	2057	2044	1785	2692	2490	2670				2654	3070	2132				2167	1829	2525
44.35	1966	2249	2135	2211	1955	1931	1306	2082	1898	2143	2127	1823	2793	2584	2735				2746	3177	2235				2270	1889	2628
48	2362	2653	2634	2407	2278	2508	2217	2753	2514	2698	2685	2046	3253	3179	3065				3427	3383	3079				3026	2888	2749
52.0333	2668	2870	2776	2493	2570	2705	2851	2958	2681	2838	2853	2192	3394	3456	3412				3665	3591	3257				3259	3513	2928
56	2817	2995	2914	2612	2665	2817	2978	3130	2867	3041	3049	2351	3559	3686	3646				3829	3823	3424				3413	3675	3113
60	2871	3141	3077	2765	2787	2944	3215	3303	3137	3286	3265	2493	3733	3932	3793				4133	3991	3623				3624	3958	3315
65.4833	3080	3403	3267	2998	2940	3137	3447	3623	3395	3653	3572	2733	3964	4220	4107				4491	4180	3742				3855	4258	3506
68.35	3133	3516	3305	3007	3037	3236	3524	3798	3541	3739	3733	2828	4105	4425	4207				4646	4304	3815				3944	4351	3560
72	3237	3689	3418	3107	3163	3417	3650	3993	3741	3886	3943	3016	4200	4637	4379				4742	4342	3885				4077	4518	3655
p38i (%Invaded)	72 hours
	DMSO	no EGF	p38i 1uM	p38i 10uM	p38i 25uM		DMSO	no EGF	p38i 1uM	p38i 10uM	p38i 25uM
	3.64535	4.57534	7.38095	4.15437	1.61884		0.380787	0.477932	0.771001	0.433957	0.169101
	8.75576	4.13223	6.18935	7.13957	1.61576		0.914611	0.431645	0.646528	0.745786	0.168779
	7.95787	3.95616	6.02877	4.63321	1.77839		0.831264	0.413253	0.629755	0.483976	0.185767
	15.1593	6.12455					1.58351	0.639759	0	0	0
	8.28327	6.26427					0.865256	0.654354	0	0	0
	13.6377	6.86339					1.42457	0.716938	0	0	0
	9.57321
p38i (Total)	72 hours
	DMSO	no EGF	p38i 1uM	p38i 10uM	p38i 25uM		DMSO	no EGF	p38i 1uM	p38i 10uM	p38i 25uM
	3237	3650	4200	4742	4077		0.969597	1.09331	1.25805	1.4204	1.22121
	3689	3993	4637	4342	4518		1.10499	1.19605	1.38895	1.30058	1.3533
	3418	3741	4379	3885	3655		1.02381	1.12056	1.31167	1.1637	1.0948
	3107	3886					0.930657	1.164
	3163	3943					0.947431	1.18107
	3417	3016					1.02351	0.9034
	3338.5
MEKi (%Invaded)
Elapsed (hours)	DMSO						no EGF						MEKi 1nM						MEKi 10nM						MEKi 100nM						MEKi 1uM
0	4.27408	1.91781	2.83086	2.32733	2.77154	1.01818	3.81792	3.02178	1.71642	2.19081	2.21543	2.54934	7.07491	1.36986	1.0575				1.32827	1.41626	2.0445				0.796569	1.28123	2.49722				2.10728	1.60919	0.996483
4.03333	1.59817	2.06259	1.03627	2.48397	1.45513	1.24224	1.7101	0.867679	0.76746	0.514706	0.856031	0.595238	1.69972	1.25962	1.08225				2.23504	2.05158	2.26365				0.233781	1.26984	1.24611				0.892244	1.82456	1.36901
8	2.08012	2.3842	1.75824	3.52423	1.55738	2.02634	1.53322	1.03164	1.05342	1.4936	1.32353	0.488202	1.56028	1.64474	1.07836				2.63533	2.92818	3.48993				0.818235	1.58604	1.20862				2.65306	3.26704	2.03692
12	1.89394	2.64201	3.03448	4.03683	2.25681	3.29341	2.20183	1.15804	0.650759	1.73565	1.2894	1.16099	2.54351	2.8463	1.71731				3.24675	3.99361	3.68601				0.338792	1.55642	1.8191				2.75168	2.70078	2.40893
17.4833	3.07802	4.10876	4.24685	5.98569	3.69532	5.11945	1.61117	1.18812	1.28205	2.44208	1.73333	1.66065	3.24841	4.2042	2.31729				3.56633	5.91424	4.38144				0.465598	2.50174	2.36295				3.4418	3.10773	3.32797
20.35	2.76596	4.80938	4.49006	6.22929	4.31548	6.43599	1.96078	1.48387	2.36646	3.29268	1.69051	2.13523	4.88699	4.62568	2.65018				4.55182	6.10687	5.22048				0.602712	2.83286	2.84117				2.96114	4.00534	3.56581
24	2.49494	5.18018	5.06098	8.22264	4.12446	7.59919	3.41615	1.67095	2.19561	2.90206	1.75769	2.92887	4.37912	5.6	3.46001				4.5993	6.61388	5.24493				1.00604	3.09654	2.67857				3.06122	3.51852	3.04942
28.0333	2.68199	5.54649	5.18783	9.23356	5.25947	8.53659	2.8971	1.90301	2.48042	2.78766	2.23661	3.25581	4.97763	5.1243	4.22845				4.60894	7.65465	5.92771				0.910931	2.26921	3.40104				3.21945	4.07407	3.42466
32	2.56567	6.2919	6.13739	10.7104	6.19174	8.67124	3.7037	2.18289	2.50918	2.86678	2.55102	3.10881	6.06549	5.62072	4.97691				4.8153	7.66924	6.20629				1.06653	2.02492	3.93074				4.0264	4.3871	3.5865
36	2.76976	7.05374	6.83396	11.7798	6.51629	9.53757	3.10835	2.88514	2.45184	4.00633	3.28216	4.00729	6.08008	6.42923	4.55417				4.55746	8.39506	6.67523				1.59151	1.91898	4.15445				3.39196	4.6466	3.7467
41.4833	3.63144	6.895	7.71108	12.4763	6.42857	11.4595	4.47761	2.66064	3.15389	4.42392	4.10959	5.09804	6.80676	7.49677	4.76994				5.2599	8.86815	7.87728				1.60403	1.92308	4.86542				3.08989	5.01074	4.10343
44.35	3.86572	7.95909	8.66511	12.8449	6.80307	12.5324	3.67535	2.73775	3.53003	4.57303	3.62012	5.10148	6.91581	7.97441	4.85197				5.34954	9.74771	2.18182				2.08432	2.52525	5.57377				2.98755	4.54545	3.79895
48	2.79424	6.97324	7.51708	12.5883	6.36523	11.2839	4.60081	3.01489	2.98329	4.63306	3.94786	4.74096	4.59459	8.30245	4.1979				4.88315	9.78022	7.62349				2.01835	1.78571	4.98992				3.33107	4.1604	3.09004
52.0333	2.77361	7.77004	7.31268	13.1969	6.92607	11.2754	4.7001	3.0426	3.46886	4.65116	4.62671	5.29197	5.47986	8.1445	5.31661				5.20548	9.94131	8.31779				2.10316	2.38095	5.17435				4.09401	4.33815	2.88809
56	3.58537	7.64608	7.61839	14.3951	7.05441	11.8211	4.56682	3.41853	3.20893	5.26143	4.69006	5.6997	5.57414	8.49176	4.89727				5.14437	9.90634	9				1.90583	2.65554	5.94727				4.15512	4.22713	3.00752
60	3.09997	8.05476	7.70231	14.575	7.35558	12.2283	4.54121	3.51196	3.53841	5.35606	5.14548	6.01685	5.89502	9.27961	5.18301				5.39392	10.2373	8.77256				2.10918	3.41113	5.97637				5.20951	5.54765	3.41085
65.4833	3.37662	7.96356	8.26446	14.7432	8.12925	13.7392	4.90281	3.809	3.65243	6.10457	5.87906	6.54958	6.13727	9.48651	5.86207				5.89924	11.3846	9.90312				2.45171	4.40476	6.85859				6.14035	5.18783	3.91621
68.35	3.51101	8.47554	7.53404	14.9318	7.67204	13.8133	4.59705	4.10743	3.67128	5.80369	6.05411	6.50636	6.36145	10.1462	5.9105				6.41677	11.5411	9.94298				2.81224	4.75544	7.77058				6.59164	6.01358	3.84615
72	3.64535	8.75576	7.95787	15.1593	8.28327	13.6377	4.57534	4.13223	3.95616	6.12455	6.26427	6.86339	5.95715	10.1301	6.0482				6.48031	11.9203	10.0106				3.34884	4.8855	8.8267				7.51445	5.89569	3.88349
MEKi (total)
Elapsed (hours)	DMSO						no EGF						MEKi 1nM						MEKi 10nM						MEKi 100nM						MEKi 1uM
0	1474	1460	1413	1332	1335	1375	1362	1423	1340	1415	1309	1216	1682	1533	1513				1581	1624	1663				1632	1561	1802				1566	1740	1706
4.03333	1314	1406	1351	1248	1237	1288	1228	1383	1303	1360	1285	1176	1412	1429	1386				1387	1706	1502				1711	1260	1605				1457	1425	1607
8	1298	1468	1365	1362	1220	987	1174	1454	1329	1406	1360	1229	1410	1520	1391				1404	1810	1490				1711	1261	1903				1470	1408	1571
12	1320	1514	1450	1412	1285	1336	1090	1468	1383	1498	1396	1292	1494	1581	1514				1386	1878	1465				1771	1285	1979				1490	1407	1702
17.4833	1397	1655	1507	1537	1326	1465	931	1515	1404	1597	1500	1385	1570	1665	1683				1402	2029	1552				1933	1439	2116				1598	1448	1863
20.35	1410	1705	1559	1509	1344	1445	918	1550	1479	1640	1538	1405	1637	1643	1698				1428	2096	1973				1991	1059	2147				1621	1498	1907
24	1483	1776	1640	1581	1382	1487	966	1556	1503	1654	1593	1434	1667	1875	1763				1435	2147	2021				1988	1647	2128				1568	1620	1902
28.0333	1566	1839	1677	1657	1426	1558	1001	1629	1532	1686	1699	1505	1788	1971	1821				1432	2247	2075				1976	1939	2117				1522	1620	1898
32	1637	1939	1776	1830	1502	1603	1080	1695	1634	1779	1764	1544	1863	2046	1949				1516	2334	2288				1969	1926	2137				1515	1550	1896
36	1733	2084	1873	1944	1596	1730	1126	1837	1713	1897	1889	1647	2023	2162	2086				1514	2430	2337				2262	1876	2046				1592	1528	1895
41.4833	1845	2219	2049	2108	1820	1850	1273	1992	1839	2057	2044	1785	2189	2321	2369				1616	2571	2412				2182	1716	1932				1424	1397	1779
44.35	1966	2249	2135	2211	1955	1931	1306	2082	1898	2143	2127	1823	2328	2345	2432				1645	2616	9075				2111	1584	1830				1205	1386	1711
48	2362	2653	2634	2407	2278	2508	2217	2753	2514	2698	2685	2046	2960	2698	2668				2867	2730	2571				2180	1736	1984				1471	1995	1877
52.0333	2668	2870	2776	2493	2570	2705	2851	2958	2681	2838	2853	2192	3376	3045	3348				2920	2726	2681				1997	1596	1778				1319	1798	1662
56	2817	2995	2914	2612	2665	2817	2978	3130	2867	3041	3049	2351	3588	3156	3553				3013	2776	2700				1784	1318	1631				1083	1585	1463
60	2871	3141	3077	2765	2787	2944	3215	3303	3137	3286	3265	2493	3715	3276	3743				3059	2823	2770				1612	1114	1439				883	1406	1290
65.4833	3080	3403	3267	2998	2940	3137	3447	3623	3395	3653	3572	2733	3992	3447	4060				3136	2925	2787				1346	840	1181				684	1118	1098
68.35	3133	3516	3305	3007	3037	3236	3524	3798	3541	3739	3733	2828	4150	3489	4179				3148	2868	2806				1209	736	1081				622	1031	962
72	3237	3689	3418	3107	3163	3417	3650	3993	3741	3886	3943	3016	4247	3613	4398				3148	2911	2837				1075	655	929				519	882	824
MEKi (%Invaded)	72 hours
	DMSO	no EGF	MEKi 1nM	MEKi 10nM	MEKi 100nM		DMSO	no EGF	MEKi 1nM	MEKi 10nM	MEKi 100nM
	3.64535	4.57534	5.95715	6.48031	3.34884		0.380787	0.477932	0.622273	0.676921	0.349813
	8.75576	4.13223	10.1301	11.9203	4.8855		0.914611	0.431645	1.05817	1.24517	0.51033
	7.95787	3.95616	6.0482	10.0106	8.8267		0.831264	0.413253	0.631784	1.04569	0.92202
	15.1593	6.12455					1.58351	0.639759	0	0	0
	8.28327	6.26427					0.865256	0.654354	0	0	0
	13.6377	6.86339					1.42457	0.716938	0	0	0
	9.57321
MEKi (Total)	72 hours
	DMSO	no EGF	MEKi 1nM	MEKi 10nM	MEKi 100nM		DMSO	no EGF	MEKi 1nM	MEKi 10nM	MEKi 100nM
	3237	3650	4247	3148	1075		0.969597	1.09331	1.27213	0.942938	0.322001
	3689	3993	3613	2911	655		1.10499	1.19605	1.08222	0.871948	0.196196
	3418	3741	4398	2837	929		1.02381	1.12056	1.31736	0.849783	0.278269
	3107	3886					0.930657	1.164	0	0	0
	3163	3943					0.947431	1.18107	0	0	0
	3417	3016					1.02351	0.9034	0	0	0
	3338.5
MLKi (%Invaded)
Elapsed (hours)	DMSO						no EGF						MLK3i 10nM						MLK3i 200nM						MLK3i 1uM						MLK3i 10uM
0	4.27408	1.91781	2.83086	2.32733	2.77154	1.01818	3.81792	3.02178	1.71642	2.19081	2.21543	2.54934	4.19847	2.41486	2.39596				3.46898	0.676183	0.865801				2.73578	1.13636	2.52215				1.56139	1.26493	2.42261
4.03333	1.59817	2.06259	1.03627	2.48397	1.45513	1.24224	1.7101	0.867679	0.76746	0.514706	0.856031	0.595238	1.41443	2.37288	2.21812				1.31387	0.8	0.453858				1.64204	0.541796	0.529501				0.291545	0.449438	0.450857
8	2.08012	2.3842	1.75824	3.52423	1.55738	2.02634	1.53322	1.03164	1.05342	1.4936	1.32353	0.488202	1.2987	1.69824	2.92911				0.968703	1.19713	0.523952				1.88841	0.464756	0.534759				0.986436	1.06762	0.649351
12	1.89394	2.64201	3.03448	4.03683	2.25681	3.29341	2.20183	1.15804	0.650759	1.73565	1.2894	1.16099	1.68237	2.99065	3.4969				2.10526	0.857756	0.603217				0.501253	0.306984	1.06061				0.490998	0.507614	0.690846
17.4833	3.07802	4.10876	4.24685	5.98569	3.69532	5.11945	1.61117	1.18812	1.28205	2.44208	1.73333	1.66065	2.59002	3.82775	6.26959				1.58371	1.62549	1.00118				0.4971	0.304646	1.08538				0.224215	1.1583	1
20.35	2.76596	4.80938	4.49006	6.22929	4.31548	6.43599	1.96078	1.48387	2.36646	3.29268	1.69051	2.13523	2.51889	3.27186	7.07019				2.0436	2.03959	1.71038				0.162999	0.827068	1.12657				0.510204	0.490196	0.958466
24	2.49494	5.18018	5.06098	8.22264	4.12446	7.59919	3.41615	1.67095	2.19561	2.90206	1.75769	2.92887	3.63636	4.82718	9.64694				1.57642	2.71676	1.96519				0.162866	0.302801	0.385356				0.573066	1.30719	0.816327
28.0333	2.68199	5.54649	5.18783	9.23356	5.25947	8.53659	2.8971	1.90301	2.48042	2.78766	2.23661	3.25581	3.70166	5.47293	11.2307				2.03279	3.29793	2.37967				0.410846	0.643317	0.714286				0.4	1.5748	1.0582
32	2.56567	6.2919	6.13739	10.7104	6.19174	8.67124	3.7037	2.18289	2.50918	2.86678	2.55102	3.10881	4.39443	6.29651	12.1076				2.37352	3.51625	3.21744				0.243112	0.502152	0.969619				0.537634	2.10526	1.35135
36	2.76976	7.05374	6.83396	11.7798	6.51629	9.53757	3.10835	2.88514	2.45184	4.00633	3.28216	4.00729	3.42942	6.18673	14.3271				2.71769	3.5913	3.29513				0.46332	0.754976	0.744879				0.671141	2.66667	1.5873
41.4833	3.63144	6.895	7.71108	12.4763	6.42857	11.4595	4.47761	2.66064	3.15389	4.42392	4.10959	5.09804	4.00188	6.86223	15.48				4.11028	3.94679	3.0477				0.64194	0.695322	1.06922				0.854701	3.7037	2.32558
44.35	3.86572	7.95909	8.66511	12.8449	6.80307	12.5324	3.67535	2.73775	3.53003	4.57303	3.62012	5.10148	4.11523	7.34406	16.4368				4.0678	4.75986	3.71608				1.15646	0.961538	0.869093				1.08696	2.5	2.63158
48	2.79424	6.97324	7.51708	12.5883	6.36523	11.2839	4.60081	3.01489	2.98329	4.63306	3.94786	4.74096	4.52457	6.32911	17.1795				2.93508	4.41279	3.22581				0.430478	0.750395	1.12994				0	0	3.84615
52.0333	2.77361	7.77004	7.31268	13.1969	6.92607	11.2754	4.7001	3.0426	3.46886	4.65116	4.62671	5.29197	4.43698	6.95851	17.887				3.56164	5.00813	3.72953				0.313234	0.81754	0.429338				0	0	5.12821
56	3.58537	7.64608	7.61839	14.3951	7.05441	11.8211	4.56682	3.41853	3.20893	5.26143	4.69006	5.6997	5.37125	7.22101	18.8867				3.28333	5.05583	3.62236				0.476016	0.672805	0.809171				0	0	7.40741
60	3.09997	8.05476	7.70231	14.575	7.35558	12.2283	4.54121	3.51196	3.53841	5.35606	5.14548	6.01685	5.91103	6.93902	19.3772				3.41089	5.26466	4.45978				0.630032	0.643631	1.12143				0	0	4.16667
65.4833	3.37662	7.96356	8.26446	14.7432	8.12925	13.7392	4.90281	3.809	3.65243	6.10457	5.87906	6.54958	6.15473	7.10542	20.0947				3.32275	6.34472	5.00719				1.0936	0.879397	0.980101				0	0	0
68.35	3.51101	8.47554	7.53404	14.9318	7.67204	13.8133	4.59705	4.10743	3.67128	5.80369	6.05411	6.50636	6.15212	7.82535	20.3537				3.2783	5.94379	5.70256				1.13811	0.894988	0.8926				0	0	0
72	3.64535	8.75576	7.95787	15.1593	8.28327	13.6377	4.57534	4.13223	3.95616	6.12455	6.26427	6.86339	6.51175	7.41981	20.7317				3.61849	5.72044	5.5054				0.68371	0.835013	0.960747				0	0	0
MLKi (total)
Elapsed (hours)	DMSO						no EGF						MLK3i 10nM						MLK3i 200nM						MLK3i 1uM						MLK3i 10uM
0	1474	1460	1413	1332	1335	1375	1362	1423	1340	1415	1309	1216	1572	1615	1586				1499	1331	1386				1389	1496	1467				1409	1423	1486
4.03333	1314	1406	1351	1248	1237	1288	1228	1383	1303	1360	1285	1176	1414	1475	1623				1370	1250	1322				1218	1292	1322				1029	890	1109
8	1298	1468	1365	1362	1220	987	1174	1454	1329	1406	1360	1229	1463	1531	1707				1342	1253	1336				1165	1291	1309				811	562	770
12	1320	1514	1450	1412	1285	1336	1090	1468	1383	1498	1396	1292	1486	1605	1773				1330	1399	1492				1197	1303	1320				611	394	579
17.4833	1397	1655	1507	1537	1326	1465	931	1515	1404	1597	1500	1385	1583	1672	1914				1326	1538	1698				1207	1313	1382				446	259	400
20.35	1410	1705	1559	1509	1344	1445	918	1550	1479	1640	1538	1405	1588	1681	1966				1468	1667	1754				1227	1330	1509				392	204	313
24	1483	1776	1640	1581	1382	1487	966	1556	1503	1654	1593	1434	1650	1678	2011				1459	1730	1781				1228	1321	1557				349	153	245
28.0333	1566	1839	1677	1657	1426	1558	1001	1629	1532	1686	1699	1505	1810	1681	2137				1525	1789	1849				1217	1399	1540				250	127	189
32	1637	1939	1776	1830	1502	1603	1080	1695	1634	1779	1764	1544	1866	1747	2230				1601	1877	1927				1234	1394	1547				186	95	148
36	1733	2084	1873	1944	1596	1730	1126	1837	1713	1897	1889	1647	2012	1778	2415				1803	1977	2094				1295	1457	1611				149	75	126
41.4833	1845	2219	2049	2108	1820	1850	1273	1992	1839	2057	2044	1785	2124	1909	2500				1995	2255	2264				1402	1582	1777				117	54	86
44.35	1966	2249	2135	2211	1955	1931	1306	2082	1898	2143	2127	1823	2187	1988	2610				2065	2332	2395				1470	1664	1841				92	40	76
48	2362	2653	2634	2407	2278	2508	2217	2753	2514	2698	2685	2046	2829	2607	2730				2896	2878	2759				2323	2532	2655				85	46	52
52.0333	2668	2870	2776	2493	2570	2705	2851	2958	2681	2838	2853	2192	2975	3061	2868				3285	3075	3298				2554	2691	2795				60	39	39
56	2817	2995	2914	2612	2665	2817	2978	3130	2867	3041	3049	2351	3165	3199	3018				3533	3224	3506				2731	2824	2966				45	34	27
60	2871	3141	3077	2765	2787	2944	3215	3303	3137	3286	3265	2493	3282	3329	3179				3782	3514	3767				2857	2952	3121				30	27	24
65.4833	3080	3403	3267	2998	2940	3137	3447	3623	3395	3653	3572	2733	3477	3434	3379				4093	3893	4174				3109	3184	3367				24	19	21
68.35	3133	3516	3305	3007	3037	3236	3524	3798	3541	3739	3733	2828	3576	3527	3449				4240	4021	4384				3251	3352	3473				18	17	17
72	3237	3689	3418	3107	3163	3417	3650	3993	3741	3886	3943	3016	3701	3585	3526				4477	4178	4541				3364	3473	3643				14	17	7
MLKi (%Invaded)	72 hours
	DMSO	no EGF	MLKi 10nM	MLKi 200nM	MLKi 1uM	MLKi 10uM	DMSO	no EGF	MLKi 10nM	MLKi 200nM	MLKi 1uM	MLKi 10uM
	3.64535	4.57534	6.51175	3.61849	0.68371	0	0.380787	0.477932	0.680206	0.377981	0.0714191	0
	8.75576	4.13223	7.41981	5.72044	0.835013	0	0.914611	0.431645	0.775059	0.597547	0.0872239	0
	7.95787	3.95616	20.7317	5.5054	0.960747	0	0.831264	0.413253	2.1656	0.575083	0.100358	0
	15.1593	6.12455					1.58351	0.639759	0	0	0	0
	8.28327	6.26427					0.865256	0.654354	0	0	0	0
	13.6377	6.86339					1.42457	0.716938	0	0	0	0
	9.57321
MLKi (Total)	72 hours
	DMSO	no EGF	MLKi 10nM	MLKi 200nM	MLKi 1uM	MLKi 10uM	DMSO	no EGF	MLKi 10nM	MLKi 200nM	MLKi 1uM	MLKi 10uM
	3237	3650	3701	4477	3364	14	0.969597	1.09331	1.10858	1.34102	1.00764	0.0041935
	3689	3993	3585	4178	3473	17	1.10499	1.19605	1.07384	1.25146	1.04029	0.00509211
	3418	3741	3526	4541	3643	7	1.02381	1.12056	1.05616	1.36019	1.09121	0.00209675
	3107	3886					0.930657	1.164	0	0	0	0
	3163	3943					0.947431	1.18107	0	0	0	0
	3417	3016					1.02351	0.9034	0	0	0	0
	3338.5
TAOK2i (%Invaded)
Elapsed (hours)	DMSO						no EGF						TAOK2i 0.1uM						TAOK2i 1uM						TAOK2i 10uM						TAOK2i 25uM
0	4.27408	1.91781	2.83086	2.32733	2.77154	1.01818	3.81792	3.02178	1.71642	2.19081	2.21543	2.54934	2.89226	2.61921	2.05058				3.74261	1.52064	4.10663				3.28859	1.3369	2.16028				2.23881	1.68582	1.35338
4.03333	1.59817	2.06259	1.03627	2.48397	1.45513	1.24224	1.7101	0.867679	0.76746	0.514706	0.856031	0.595238	2.99595	1.79856	1.03474				2.83592	1.53846	1.29278				0.743494	0.403877	0.823723				0.134771	0.275735	0.323625
8	2.08012	2.3842	1.75824	3.52423	1.55738	2.02634	1.53322	1.03164	1.05342	1.4936	1.32353	0.488202	2.88462	2.75035	1.84426				3.19905	1.40515	1.7194				0.396825	0.838926	1.02916				0.396825	0.202634	0.334169
12	1.89394	2.64201	3.03448	4.03683	2.25681	3.29341	2.20183	1.15804	0.650759	1.73565	1.2894	1.16099	3.00694	4.51787	3.00511				5.5336	2.00617	2.46174				0.20429	0.588235	1.75593				0.275103	0.104712	0.343643
17.4833	3.07802	4.10876	4.24685	5.98569	3.69532	5.11945	1.61117	1.18812	1.28205	2.44208	1.73333	1.66065	4.87273	6.03279	4.21112				6.62324	2.914	2.92994				0.9375	1.55642	1.30095				0.209644	0.112233	0.274223
20.35	2.76596	4.80938	4.49006	6.22929	4.31548	6.43599	1.96078	1.48387	2.36646	3.29268	1.69051	2.13523	4.64104	6.42261	4.55779				7.46114	3.77224	3.50319				0.839454	1.6683	1.40228				0.295421	0.112867	0.283286
24	2.49494	5.18018	5.06098	8.22264	4.12446	7.59919	3.41615	1.67095	2.19561	2.90206	1.75769	2.92887	6.11814	8.0207	5.7098				8.95448	4.34783	3.91547				1.39785	2.23805	1.44796				0.386997	0.471143	0.40404
28.0333	2.68199	5.54649	5.18783	9.23356	5.25947	8.53659	2.8971	1.90301	2.48042	2.78766	2.23661	3.25581	5.4494	8.99504	6.74326				11.0678	5.07581	5.32297				4.06015	1.68421	1.98864				0.40783	0.246914	0.424628
32	2.56567	6.2919	6.13739	10.7104	6.19174	8.67124	3.7037	2.18289	2.50918	2.86678	2.55102	3.10881	6.24187	9.40534	7.95781				12.4592	5.05438	4.82955				3.49887	2.02991	2.39923				0.434405	0.630517	0.4561
36	2.76976	7.05374	6.83396	11.7798	6.51629	9.53757	3.10835	2.88514	2.45184	4.00633	3.28216	4.00729	7.16889	9.82242	9.5				14.0666	5.63467	5.13107				1.89125	2.12054	2.0428				0.546946	0.280505	0.934579
41.4833	3.63144	6.895	7.71108	12.4763	6.42857	11.4595	4.47761	2.66064	3.15389	4.42392	4.10959	5.09804	7.83132	12.0041	10.7098				16.5712	7.12991	6.82163				0.940071	2.62557	2.43655				0.640342	0.906344	0.962861
44.35	3.86572	7.95909	8.66511	12.8449	6.80307	12.5324	3.67535	2.73775	3.53003	4.57303	3.62012	5.10148	7.99785	12.543	10.7902				17.5398	8.14978	7.6699				1.82002	3.1927	2.81124				0.55991	0.815661	1.32743
48	2.79424	6.97324	7.51708	12.5883	6.36523	11.2839	4.60081	3.01489	2.98329	4.63306	3.94786	4.74096	6.05173	12.3504	10.2456				18.0104	6.70059	6.39928				1.9437	2.75035	2.94785				0.569476	0.540541	0.904977
52.0333	2.77361	7.77004	7.31268	13.1969	6.92607	11.2754	4.7001	3.0426	3.46886	4.65116	4.62671	5.29197	6.29838	11.6129	10.519				18.6876	7.12719	6.53378				2.13761	3.3801	3.05615				0.65445	0.434153	1.19454
56	3.58537	7.64608	7.61839	14.3951	7.05441	11.8211	4.56682	3.41853	3.20893	5.26143	4.69006	5.6997	6.98835	12.0014	11.3735				18.7823	7.04769	7.09122				2.44399	3.78097	3.50501				0.566572	0.491803	0.764818
60	3.09997	8.05476	7.70231	14.575	7.35558	12.2283	4.54121	3.51196	3.53841	5.35606	5.14548	6.01685	7.56486	12.3249	11.6991				19.2055	7.59076	7.10509				3.45314	4.25815	3.35821				0.955414	0.668896	0.854701
65.4833	3.37662	7.96356	8.26446	14.7432	8.12925	13.7392	4.90281	3.809	3.65243	6.10457	5.87906	6.54958	8.34788	13.7222	12.7691				20.4883	7.88564	7.59259				3.66838	4.8227	4.27553				0.553506	0.766284	1.27226
68.35	3.51101	8.47554	7.53404	14.9318	7.67204	13.8133	4.59705	4.10743	3.67128	5.80369	6.05411	6.50636	8.13855	13.3075	12.6179				20.6815	7.76758	7.14935				4.08472	5.1787	4.54177				1.30597	0.618557	1.38504
72	3.64535	8.75576	7.95787	15.1593	8.28327	13.6377	4.57534	4.13223	3.95616	6.12455	6.26427	6.86339	8.45717	13.3629	12.7158				21.3606	8.00949	7.73104				4.76569	4.89671	5.07309				0.642398	0.461894	0.952381
TAOK2i (total)
Elapsed (hours)	DMSO						no EGF						TAOK2i 0.1uM						TAOK2i 1uM						TAOK2i 10uM						TAOK2i 25uM
0	1474	1460	1413	1332	1335	1375	1362	1423	1340	1415	1309	1216	1383	1489	1463				1523	1381	1388				1490	1496	1435				1608	1305	1330
4.03333	1314	1406	1351	1248	1237	1288	1228	1383	1303	1360	1285	1176	1235	1390	1353				1481	1235	1315				1076	1238	1214				1484	1088	1236
8	1298	1468	1365	1362	1220	987	1174	1454	1329	1406	1360	1229	1248	1418	1464				1688	1281	1454				1008	1192	1166				1512	987	1197
12	1320	1514	1450	1412	1285	1336	1090	1468	1383	1498	1396	1292	1297	1483	1564				1771	1296	1503				979	1020	1139				1454	955	1164
17.4833	1397	1655	1507	1537	1326	1465	931	1515	1404	1597	1500	1385	1375	1525	1781				1842	1407	1570				960	1028	1153				1431	891	1094
20.35	1410	1705	1559	1509	1344	1445	918	1550	1479	1640	1538	1405	1379	1557	1843				1930	1405	1570				953	1019	1141				1354	886	1059
24	1483	1776	1640	1581	1382	1487	966	1556	1503	1654	1593	1434	1422	1546	1909				1999	1449	1609				930	983	1105				1292	849	990
28.0333	1566	1839	1677	1657	1426	1558	1001	1629	1532	1686	1699	1505	1413	1612	2002				2051	1517	1672				665	950	1056				1226	810	942
32	1637	1939	1776	1830	1502	1603	1080	1695	1634	1779	1764	1544	1538	1648	2086				2143	1563	1760				886	936	1042				1151	793	877
36	1733	2084	1873	1944	1596	1730	1126	1837	1713	1897	1889	1647	1646	1802	2200				2282	1615	1793				846	896	1028				1097	713	856
41.4833	1845	2219	2049	2108	1820	1850	1273	1992	1839	2057	2044	1785	1826	1941	2381				2444	1655	1979				851	876	985				937	662	727
44.35	1966	2249	2135	2211	1955	1931	1306	2082	1898	2143	2127	1823	1863	2033	2493				2577	1362	2060				989	877	996				893	613	678
48	2362	2653	2634	2407	2278	2508	2217	2753	2514	2698	2685	2046	2049	2340	2606				2704	2358	2219				1492	1418	1323				878	740	663
52.0333	2668	2870	2776	2493	2570	2705	2851	2958	2681	2838	2853	2192	2842	2635	2871				2804	2736	2709				1497	1568	1407				764	691	586
56	2817	2995	2914	2612	2665	2817	2978	3130	2867	3041	3049	2351	3005	2808	3007				2907	2852	2905				1473	1534	1398				706	610	523
60	2871	3141	3077	2765	2787	2944	3215	3303	3137	3286	3265	2493	3199	2856	3137				3046	3030	3026				1419	1503	1340				628	598	468
65.4833	3080	3403	3267	2998	2940	3137	3447	3623	3395	3653	3572	2733	3438	3017	3344				3236	3183	3240				1363	1410	1263				542	522	393
68.35	3133	3516	3305	3007	3037	3236	3524	3798	3541	3739	3733	2828	3551	3096	3392				3375	3270	3301				1322	1371	1233				536	485	361
72	3237	3689	3418	3107	3163	3417	3650	3993	3741	3886	3943	3016	3701	3158	3476				3469	3371	3376				1259	1307	1163				467	433	315
TAOK2i (%Invaded)	72 hours
	DMSO	no EGF	TAOK2i 0.1uM	TAOK2i 1uM	TAOK2i 10uM	TAOK2i 25uM	DMSO	no EGF	TAOK2i 0.1uM	TAOK2i 1uM	TAOK2i 10uM	TAOK2i 25uM
	3.64535	4.57534	8.45717	21.3606	4.76569	0.642398	0.380787	0.477932	0.883421	2.23129	0.497815	0.0671037
	8.75576	4.13223	13.3629	8.00949	4.89671	0.461894	0.914611	0.431645	1.39586	0.836657	0.511501	0.0482486
	7.95787	3.95616	12.7158	7.73104	5.07309	0.952381	0.831264	0.413253	1.32827	0.807571	0.529925	0.099484
	15.1593	6.12455					1.58351	0.639759	0	0	0	0
	8.28327	6.26427					0.865256	0.654354	0	0	0	0
	13.6377	6.86339					1.42457	0.716938	0	0	0	0
	9.57321
TAOK2i (total)	72 hours
	DMSO	no EGF	TAOK2i 0.1uM	TAOK2i 1uM	TAOK2i 10uM	TAOK2i 25uM	DMSO	no EGF	TAOK2i 0.1uM	TAOK2i 1uM	TAOK2i 10uM	TAOK2i 25uM
	3237	3650	3701	3469	1259	467	0.969597	1.09331	1.10858	1.03909	0.377115	0.139883
	3689	3993	3158	3371	1307	433	1.10499	1.19605	0.945934	1.00973	0.391493	0.129699
	3418	3741	3476	3376	1163	315	1.02381	1.12056	1.04119	1.01123	0.34836	0.0943538
	3107	3886					0.930657	1.164	0	0	0	0
	3163	3943					0.947431	1.18107	0	0	0	0
	3417	3016					1.02351	0.9034	0	0	0	0
	3338.5
CK2i (%Invaded)
Elapsed (hours)	DMSO						no EGF						CK2i 0.1uM						CK2i 1uM						CK2i 10uM						CK2i 25uM
0	4.27408	1.91781	2.83086	2.32733	2.77154	1.01818	3.81792	3.02178	1.71642	2.19081	2.21543	2.54934	2.25807	1.40845	2.64201				1.23305	1.83802	1.16851				1.80348	1.72308	2.39018				1.35218	1.98591	1.73333
4.03333	1.59817	2.06259	1.03627	2.48397	1.45513	1.24224	1.7101	0.867679	0.76746	0.514706	0.856031	0.595238	1.65165	1.21602	2.61059				0.967519	1.27353	1.23762				0.570704	1.15646	1.04556				0.495751	0.95518	0.763359
8	2.08012	2.3842	1.75824	3.52423	1.55738	2.02634	1.53322	1.03164	1.05342	1.4936	1.32353	0.488202	1.22655	1.21083	2.06795				1.14458	1.45946	2.18289				1.07334	1.96353	0.967982				0.144196	1.0582	0.55336
12	1.89394	2.64201	3.03448	4.03683	2.25681	3.29341	2.20183	1.15804	0.650759	1.73565	1.2894	1.16099	1.36691	3.85185	2.66187				1.08696	2.89555	3.02298				1.05448	1.56807	1.98413				0.2079	1.14591	0.910596
17.4833	3.07802	4.10876	4.24685	5.98569	3.69532	5.11945	1.61117	1.18812	1.28205	2.44208	1.73333	1.66065	2.27116	2.76009	4.33898				0.897666	4.86747	3.83459				1.18624	2.48681	1.91388				1.38081	0.88853	0.685518
20.35	2.76596	4.80938	4.49006	6.22929	4.31548	6.43599	1.96078	1.48387	2.36646	3.29268	1.69051	2.13523	3.20641	2.19573	4.72155				1.19726	5.45282	3.99704				1.43027	2.76119	1.97011				0.963677	1.17279	1.81661
24	2.49494	5.18018	5.06098	8.22264	4.12446	7.59919	3.41615	1.67095	2.19561	2.90206	1.75769	2.92887	4.33622	3.07403	5.96923				1.25683	6.96004	6.91057				1.65583	2.37288	1.38889				0.853375	1.69218	0.894454
28.0333	2.68199	5.54649	5.18783	9.23356	5.25947	8.53659	2.8971	1.90301	2.48042	2.78766	2.23661	3.25581	5.72687	4.02129	6.21638				2.11752	7.71945	6.77233				1.99035	3.54223	2.50358				0.24855	1.18946	1.322
32	2.56567	6.2919	6.13739	10.7104	6.19174	8.67124	3.7037	2.18289	2.50918	2.86678	2.55102	3.10881	4.71642	5.01393	6.86046				1.67768	8.36838	7.94941				2.1512	3.65014	2.49267				0.342466	0.625	0.993049
36	2.76976	7.05374	6.83396	11.7798	6.51629	9.53757	3.10835	2.88514	2.45184	4.00633	3.28216	4.00729	4.11964	5.94796	6.95793				2.32897	9.13746	8.18986				2.71808	4.09438	3.37987				1.21495	0.923361	0.968784
41.4833	3.63144	6.895	7.71108	12.4763	6.42857	11.4595	4.47761	2.66064	3.15389	4.42392	4.10959	5.09804	4.34372	6.40038	8.28026				3.1086	11.1962	9.46903				3.0303	4.51128	3.8777				0.348736	1.18812	0.669643
44.35	3.86572	7.95909	8.66511	12.8449	6.80307	12.5324	3.67535	2.73775	3.53003	4.57303	3.62012	5.10148	4.45657	6.37119	8.06011				3.32696	12.5306	11.267				3.25945	5.04371	3.40651				0.454133	1.08588	0.706714
48	2.79424	6.97324	7.51708	12.5883	6.36523	11.2839	4.60081	3.01489	2.98329	4.63306	3.94786	4.74096	4.94942	5.80475	7.01468				3.9065	13.6288	10.7481				3.95778	5.80411	4.20918				0.341006	1.07349	0.862895
52.0333	2.77361	7.77004	7.31268	13.1969	6.92607	11.2754	4.7001	3.0426	3.46886	4.65116	4.62671	5.29197	5.36375	5.99755	7.44751				4.37143	14.4274	11.3308				4.72973	6.47169	4.84809				0.69808	1.04895	0.687623
56	3.58537	7.64608	7.61839	14.3951	7.05441	11.8211	4.56682	3.41853	3.20893	5.26143	4.69006	5.6997	5.93768	6.40296	7.97856				4.46137	14.2944	11.7438				3.96175	7.53031	4.24242				0.092851	0.85389	0.431499
60	3.09997	8.05476	7.70231	14.575	7.35558	12.2283	4.54121	3.51196	3.53841	5.35606	5.14548	6.01685	6.12643	6.79245	7.88849				5.08951	15.2982	12.2758				5.05891	8.15006	4.61956				0.206612	1.32518	0.2457
65.4833	3.37662	7.96356	8.26446	14.7432	8.12925	13.7392	4.90281	3.809	3.65243	6.10457	5.87906	6.54958	6.1792	6.87911	8.33095				5.43792	15.8998	13.0515				6.03448	8.95722	5.67227				0.116009	1.24575	0.859599
68.35	3.51101	8.47554	7.53404	14.9318	7.67204	13.8133	4.59705	4.10743	3.67128	5.80369	6.05411	6.50636	6.29353	6.8823	8.46797				5.75242	15.6299	14.1304				6.65646	9.62457	5.19203				0.243605	1.53664	0.15748
72	3.64535	8.75576	7.95787	15.1593	8.28327	13.6377	4.57534	4.13223	3.95616	6.12455	6.26427	6.86339	6.21088	6.71798	8.81796				5.55925	15.3653	13.757				6.49038	10.7143	5.70999				0.280112	1.71504	0.165289
CK2i (total)
Elapsed (hours)	DMSO						no EGF						CK2i 0.1uM						CK2i 1uM						CK2i 10uM						CK2i 25uM
0	1474	1460	1413	1332	1335	1375	1362	1423	1340	1415	1309	1216	1550	1562	1514				1622	1741	1626				1608	1625	1548				1627	1561	1500
4.03333	1314	1406	1351	1248	1237	1288	1228	1383	1303	1360	1285	1176	1332	1398	1379				1447	1806	1616				1577	1470	1339				1412	1361	1310
8	1298	1468	1365	1362	1220	987	1174	1454	1329	1406	1360	1229	1386	1404	1354				1660	1850	1695				1677	1426	1343				1387	1323	1265
12	1320	1514	1450	1412	1285	1336	1090	1468	1383	1498	1396	1292	1390	1350	1390				1656	1934	1654				1707	1403	1512				1443	1309	1208
17.4833	1397	1655	1507	1537	1326	1465	931	1515	1404	1597	1500	1385	1453	1413	1475				1671	2075	1330				1686	1327	1463				1376	1238	1167
20.35	1410	1705	1559	1509	1344	1445	918	1550	1479	1640	1538	1405	1497	1594	1652				1754	2109	1351				1678	1340	1472				1349	1279	1156
24	1483	1776	1640	1581	1382	1487	966	1556	1503	1654	1593	1434	1499	1594	1625				1830	2227	1722				1691	1475	1440				1289	1241	1118
28.0333	1566	1839	1677	1657	1426	1558	1001	1629	1532	1686	1699	1505	1589	1691	1673				1889	2267	2082				1658	1468	1398				1207	1177	1059
32	1637	1939	1776	1830	1502	1603	1080	1695	1634	1779	1764	1544	1675	1795	1720				1967	2378	2214				1627	1452	1364				1168	1120	1007
36	1733	2084	1873	1944	1596	1730	1126	1837	1713	1897	1889	1647	1772	1883	1854				2061	2539	2149				1582	1441	1361				1070	1083	929
41.4833	1845	2219	2049	2108	1820	1850	1273	1992	1839	2057	2044	1785	2118	2078	1884				2477	2742	2260				1584	1463	1341				1147	1010	896
44.35	1966	2249	2135	2211	1955	1931	1306	2082	1898	2143	2127	1823	2199	2166	2196				2615	2857	2352				1534	1487	1321				1101	1013	849
48	2362	2653	2634	2407	2278	2508	2217	2753	2514	2698	2685	2046	2768	2653	2452				3123	3001	3061				1516	1654	1568				1173	1211	1043
52.0333	2668	2870	2776	2493	2570	2705	2851	2958	2681	2838	2853	2192	3244	3268	3048				3500	3126	3186				1480	1607	1547				1146	1144	1018
56	2817	2995	2914	2612	2665	2817	2978	3130	2867	3041	3049	2351	3402	3514	3171				3676	3281	3372				1464	1567	1485				1077	1054	927
60	2871	3141	3077	2765	2787	2944	3215	3303	3137	3286	3265	2493	3591	3710	3372				3910	3471	3568				1443	1546	1472				968	981	814
65.4833	3080	3403	3267	2998	2940	3137	3447	3623	3395	3653	3572	2733	3884	3954	3493				4156	3673	3808				1392	1496	1428				862	883	698
68.35	3133	3516	3305	3007	3037	3236	3524	3798	3541	3739	3733	2828	4020	4112	3590				4346	3826	3956				1307	1465	1406				821	846	635
72	3237	3689	3418	3107	3163	3417	3650	3993	3741	3886	3943	3016	4154	4287	3697				4515	3983	4107				1248	1400	1331				714	758	605
CK2i (%Invaded)	72 hours
	DMSO	no EGF	CK2i 0.1uM	CK2i 1uM	CK2i 10uM	CK2i 25uM	DMSO	no EGF	CK2i 0.1uM	CK2i 1uM	CK2i 10uM	CK2i 25uM
	3.64535	4.57534	6.21088	5.55925	6.49038	0.280112	0.380787	0.477932	0.648777	0.580709	0.677974	0.02926
	8.75576	4.13223	6.71798	15.3653	10.7143	1.71504	0.914611	0.431645	0.701748	1.60503	1.1192	0.17915
	7.95787	3.95616	8.81796	13.757	5.70999	0.165289	0.831264	0.413253	0.921108	1.43703	0.596455	0.0172658
	15.1593	6.12455					1.58351	0.639759	0	0	0	0
	8.28327	6.26427					0.865256	0.654354	0	0	0	0
	13.6377	6.86339					1.42457	0.716938	0	0	0	0
	9.57321
CK2i (total)	72 hours
	DMSO	no EGF	CK2i 0.1uM	CK2i 1uM	CK2i 10uM	CK2i 25uM	DMSO	no EGF	CK2i 0.1uM	CK2i 1uM	CK2i 10uM	CK2i 25uM
	3237	3650	4154	4515	1248	714	0.969597	1.09331	1.24427	1.3524	0.373821	0.213869
	3689	3993	4287	3983	1400	758	1.10499	1.19605	1.28411	1.19305	0.41935	0.227048
	3418	3741	3697	4107	1331	605	1.02381	1.12056	1.10738	1.23019	0.398682	0.181219
	3107	3886					0.930657	1.164	0	0	0	0
	3163	3943					0.947431	1.18107	0	0	0	0
	3417	3016					1.02351	0.9034	0	0	0	0
	3338.5

## Sheet: Assay2
TOP
Elapsed (hr)	EGF control				no EGF control				p38i alone				JNKi alone				MEKi alone				CK2i alone				TAOK2i (583) alone				MLKi alone				TAOK2i+p38i				TAOK2i+JNKi				TAOK2i+MEKi				TAOK2i+MLKi				CK2i+p38i
0	1853	1955	1740	1815	1860	1830	1704	1807	1749	1706	1828	1751	1727	1830	1822	1726	1850	1702	1759	1839	1717	1715	1734	1748	1760	1567	1755	1739	1776	1670	1809	1802	1701	1696	1769	1513	1590	1607	1641	1539	1599	1489	1520	1625	1688	1406	1390	1414	1263
4.03333	1984	2074	1926	1982	1999	1955	1936	1976	1922	2000	1944	1879	1960	1923	1942	1922	2035	1965	1885	1987	1923	1969	1835	1838	1950	1908	1911	1846	1899	1730	1893	1965	1861	1867	1938	1859	1722	1733	1842	1702	1781	1562	1650	1768	1863	1703	1707	1742	1550
8	2114	2151	1996	2054	2095	2092	2052	2111	2008	2054	2057	1937	2046	2002	2061	2045	2158	2039	1988	2073	2021	2044	1917	1923	2031	1982	1962	1929	1984	1817	1993	2055	1932	1962	1984	1969	1836	1800	1920	1764	1885	1657	1729	1835	1920	1789	1809	1805	1595
12	2155	2289	2065	2115	2163	2195	2164	2144	2078	2142	2058	1997	2094	2063	2133	2150	2230	2113	2065	2165	2084	2110	2018	2008	2074	2081	2063	2040	2051	1937	2063	2096	2005	2034	2078	2028	1865	1866	1998	1849	1978	1739	1795	1926	2037	1868	1871	1892	1643
17.4833	2282	2385	2196	2271	2311	2315	2317	2303	2209	2291	2154	2081	2212	2186	2254	2268	2366	2315	2227	2354	2245	2220	2166	2101	2231	2230	2221	2170	2232	2021	2219	2181	2140	2113	2112	2128	1995	1949	2172	2013	2090	1834	1926	2058	2202	2019	1987	1973	1737
20.35	2341	2458	2244	2365	2426	2363	2383	2362	2266	2315	2249	2156	2279	2268	2336	2342	2408	2446	2289	2404	2303	2274	2188	2132	2306	2227	2277	2291	2281	2068	2246	2289	2202	2231	2216	2182	2078	2059	2246	2063	2165	1900	1976	2141	2252	2069	2046	2023	1776
24	2361	2499	2303	2399	2496	2438	2459	2481	2374	2390	2312	2221	2374	2384	2421	2405	2485	2519	2384	2473	2395	2331	2262	2172	2379	2302	2357	2385	2393	2133	2303	2299	2303	2301	2287	2187	2097	2119	2274	2127	2229	1982	2009	2172	2343	2106	2135	2087	1863
28.0333	2470	2561	2374	2488	2641	2516	2614	2558	2451	2488	2373	2310	2442	2488	2514	2606	2580	2599	2458	2578	2464	2436	2331	2250	2476	2397	2441	2467	2481	2308	2465	2384	2377	2416	2386	2281	2232	2243	2474	2268	2303	2037	2120	2269	2427	2212	2211	2152	1929
32	2553	2663	2499	2560	2788	2668	2762	2716	2559	2578	2519	2380	2610	2679	2638	2732	2694	2658	2593	2631	2618	2603	2403	2326	2555	2497	2511	2577	2656	2384	2564	2505	2563	2581	2469	2422	2377	2349	2594	2392	2403	2120	2183	2312	2547	2310	2376	2220	2044
36	2637	2780	2592	2711	2983	2769	2965	2910	2668	2727	2596	2511	2745	2758	2742	2866	2762	2746	2716	2749	2712	2708	2503	2454	2612	2646	2622	2690	2831	2506	2650	2554	2683	2685	2573	2551	2506	2549	2769	2514	2478	2175	2226	2374	2676	2404	2476	2379	2176
41.4833	2719	2968	2728	2853	3150	3003	3209	3144	2862	2856	2777	2666	2939	2976	2990	3089	2838	2883	2826	2829	2922	2900	2680	2646	2772	2848	2787	2879	3016	2668	2802	2711	2879	2874	2792	2733	2664	2700	2952	2651	2573	2231	2252	2473	2842	2566	2606	2494	2289
44.35	2774	3045	2793	2941	3284	3137	3334	3219	2974	2941	2856	2707	3026	3115	3113	3220	2873	2901	2881	2922	3014	3003	2776	2690	2843	2931	2910	2961	3066	2774	2908	2811	3016	2948	2893	2827	2799	2824	3092	2783	2610	2281	2288	2519	2935	2659	2711	2598	2393
48	2867	3220	2900	3036	3486	3307	3524	3377	3087	3051	2991	2769	3139	3300	3232	3345	2886	2968	2906	2934	3146	3099	2916	2797	2963	3044	3015	3118	3222	2869	3042	2927	3199	3113	3052	2923	2922	2955	3226	2866	2611	2300	2288	2571	3052	2775	2804	2672	2491
52.0333	2904	3317	3021	3181	3628	3443	3678	3589	3245	3193	3109	2902	3264	3440	3392	3539	2907	3065	2919	2984	3295	3201	3028	2949	3113	3203	3134	3261	3334	2990	3150	3018	3360	3242	3174	3050	3067	3088	3399	3063	2673	2357	2340	2582	3177	2895	3000	2829	2612
60	3049	3474	3223	3437	3985	3710	3980	3940	3472	3417	3289	3030	3559	3733	3652	3868	2908	3107	3016	3009	3521	3407	3284	3115	3322	3465	3388	3496	3584	3327	3431	3199	3661	3443	3430	3281	3383	3339	3647	3328	2647	2404	2338	2606	3361	3174	3296	3076	2869
65.4833	3153	3607	3379	3490	4214	3847	4250	4120	3564	3491	3418	3146	3657	3864	3784	4065	2896	3159	3009	2995	3574	3488	3407	3181	3471	3454	3510	3565	3606	3552	3435	3263	3806	3539	3492	3354	3511	3457	3749	3464	2647	2360	2323	2557	3397	3191	3513	3209	3051
68.35	3187	3689	3426	3519	4284	3904	4344	4198	3597	3567	3421	3185	3656	3889	3758	4170	2865	3101	2986	2949	3628	3508	3470	3253	3516	3506	3551	3626	3645	3671	3463	3247	3844	3484	3485	3409	3569	3521	3794	3539	2565	2384	2231	2526	3431	3254	3595	3277	3130
BOTTOM
Elapsed (hr)	EGF control				no EGF control				p38i alone				JNKi alone				MEKi alone				CK2i alone				TAOK2i (583) alone				MLKi alone				TAOK2i+p38i				TAOK2i+JNKi				TAOK2i+MEKi				TAOK2i+MLKi				CK2i+p38i
0	13	15	51	6	14	18	18	13	16	23	23	9	8	22	11	20	8	24	8	7	19	25	11	15	13	39	20	18	15	5	12	19	8	22	15	11	14	15	8	12	21	17	24	10	25	24	19	28	28
4.03333	8	17	24	18	11	11	4	11	13	27	7	11	9	14	11	27	18	18	12	15	26	24	24	10	10	18	8	10	10	15	20	26	19	24	11	7	18	12	24	13	22	8	31	14	17	25	21	9	8
8	7	20	15	31	12	28	8	13	26	35	22	16	19	30	18	28	21	24	24	8	25	30	14	25	13	26	15	17	22	19	26	24	16	20	8	18	20	23	17	22	31	11	24	33	20	24	22	13	5
12	3	37	23	7	18	20	14	14	28	44	11	23	16	36	24	25	24	30	34	21	37	31	24	43	10	16	13	33	25	23	28	43	21	23	9	21	27	22	20	18	25	23	25	27	27	43	24	17	7
17.4833	10	55	32	16	21	25	20	12	27	69	21	23	28	43	31	44	31	34	21	19	43	77	21	37	18	19	9	45	27	36	17	42	27	57	9	43	34	23	30	23	32	11	30	42	21	51	28	12	9
20.35	8	57	43	14	14	30	16	31	38	70	27	20	33	68	28	42	31	36	21	23	47	70	28	69	12	22	11	38	46	52	17	42	37	39	8	33	37	27	36	23	38	15	29	55	27	62	28	12	8
24	4	62	48	25	30	35	22	23	36	69	37	22	33	72	24	45	31	47	31	17	55	81	20	51	19	27	8	53	44	61	19	63	36	46	9	32	46	37	52	38	39	16	32	42	33	70	37	12	6
28.0333	21	71	58	22	30	33	28	21	47	74	38	33	29	99	20	74	27	44	30	27	64	83	30	63	22	24	6	57	49	76	20	86	56	73	15	32	62	48	39	52	47	22	27	47	46	76	46	12	6
32	9	81	63	15	28	40	30	23	58	79	56	35	32	95	33	88	35	43	33	25	75	123	42	88	16	21	19	63	49	99	22	94	64	58	17	42	63	64	56	52	44	25	30	55	44	80	55	12	5
36	13	87	62	18	38	48	28	29	65	85	52	31	33	105	48	99	44	52	28	30	96	106	41	77	26	31	29	69	50	97	26	110	65	60	24	45	63	61	39	53	54	17	30	57	43	101	52	15	9
41.4833	10	105	78	17	28	47	36	29	71	121	68	29	40	145	42	116	42	61	39	22	94	135	48	90	16	34	13	108	66	116	35	144	69	76	28	60	82	97	76	80	57	23	35	80	49	129	70	19	4
44.35	17	100	90	20	33	58	35	31	76	126	67	33	33	168	46	123	35	67	42	33	79	129	56	87	30	48	23	114	77	119	39	157	68	93	24	57	79	85	64	70	55	33	34	76	63	126	83	18	8
48	17	114	107	23	40	63	57	40	88	127	73	40	44	188	55	143	41	67	45	34	87	162	59	90	26	39	31	126	104	149	50	168	78	99	21	70	96	111	68	74	56	30	36	72	90	142	68	20	1
52.0333	20	119	127	31	54	65	55	33	90	128	84	38	38	201	81	173	44	76	53	23	104	185	59	100	28	41	22	131	91	157	42	188	79	104	35	68	104	121	86	91	63	28	39	77	82	141	81	26	5
60	19	145	167	26	60	75	67	45	101	139	117	44	56	229	88	203	53	79	57	29	114	218	74	137	43	35	14	181	134	175	58	200	101	136	25	88	129	141	102	120	57	35	39	83	109	166	96	28	9
65.4833	21	149	175	40	67	100	90	59	101	144	111	42	74	267	99	197	51	80	52	36	99	247	72	141	39	36	38	193	119	201	75	193	98	132	15	89	121	151	111	147	55	40	39	85	113	159	124	39	11
68.35	22	156	171	27	70	81	88	50	107	147	117	41	61	278	103	221	56	76	56	33	96	239	77	142	29	30	23	204	124	190	65	215	104	131	18	99	124	167	99	131	60	41	39	90	121	184	141	33	11
TOTAL
Elapsed (hr)	EGF control				no EGF control				p38i alone				JNKi alone				MEKi alone				CK2i alone				TAOK2i (583) alone				MLKi alone				TAOK2i+p38i				TAOK2i+JNKi				TAOK2i+MEKi				TAOK2i+MLKi				CK2i+p38i
0	1866	1970	1791	1821	1874	1848	1722	1820	1765	1729	1851	1760	1735	1852	1833	1746	1858	1726	1767	1846	1736	1740	1745	1763	1773	1606	1775	1757	1791	1675	1821	1821	1709	1718	1784	1524	1604	1622	1649	1551	1620	1506	1544	1635	1713	1430	1409	1442	1291
4.03333	1992	2091	1950	2000	2010	1966	1940	1987	1935	2027	1951	1890	1969	1937	1953	1949	2053	1983	1897	2002	1949	1993	1859	1848	1960	1926	1919	1856	1909	1745	1913	1991	1880	1891	1949	1866	1740	1745	1866	1715	1803	1570	1681	1782	1880	1728	1728	1751	1558
8	2121	2171	2011	2085	2107	2120	2060	2124	2034	2089	2079	1953	2065	2032	2079	2073	2179	2063	2012	2081	2046	2074	1931	1948	2044	2008	1977	1946	2006	1836	2019	2079	1948	1982	1992	1987	1856	1823	1937	1786	1916	1668	1753	1868	1940	1813	1831	1818	1600
12	2158	2326	2088	2122	2181	2215	2178	2158	2106	2186	2069	2020	2110	2099	2157	2175	2254	2143	2099	2186	2121	2141	2042	2051	2084	2097	2076	2073	2076	1960	2091	2139	2026	2057	2087	2049	1892	1888	2018	1867	2003	1762	1820	1953	2064	1911	1895	1909	1650
17.4833	2292	2440	2228	2287	2332	2340	2337	2315	2236	2360	2175	2104	2240	2229	2285	2312	2397	2349	2248	2373	2288	2297	2187	2138	2249	2249	2230	2215	2259	2057	2236	2223	2167	2170	2121	2171	2029	1972	2202	2036	2122	1845	1956	2100	2223	2070	2015	1985	1746
20.35	2349	2515	2287	2379	2440	2393	2399	2393	2304	2385	2276	2176	2312	2336	2364	2384	2439	2482	2310	2427	2350	2344	2216	2201	2318	2249	2288	2329	2327	2120	2263	2331	2239	2270	2224	2215	2115	2086	2282	2086	2203	1915	2005	2196	2279	2131	2074	2035	1784
24	2365	2561	2351	2424	2526	2473	2481	2504	2410	2459	2349	2243	2407	2456	2445	2450	2516	2566	2415	2490	2450	2412	2282	2223	2398	2329	2365	2438	2437	2194	2322	2362	2339	2347	2296	2219	2143	2156	2326	2165	2268	1998	2041	2214	2376	2176	2172	2099	1869
28.0333	2491	2632	2432	2510	2671	2549	2642	2579	2498	2562	2411	2343	2471	2587	2534	2680	2607	2643	2488	2605	2528	2519	2361	2313	2498	2421	2447	2524	2530	2384	2485	2470	2433	2489	2401	2313	2294	2291	2513	2320	2350	2059	2147	2316	2473	2288	2257	2164	1935
32	2562	2744	2562	2575	2816	2708	2792	2739	2617	2657	2575	2415	2642	2774	2671	2820	2729	2701	2626	2656	2693	2726	2445	2414	2571	2518	2530	2640	2705	2483	2586	2599	2627	2639	2486	2464	2440	2413	2650	2444	2447	2145	2213	2367	2591	2390	2431	2232	2049
36	2650	2867	2654	2729	3021	2817	2993	2939	2733	2812	2648	2542	2778	2863	2790	2965	2806	2798	2744	2779	2808	2814	2544	2531	2638	2677	2651	2759	2881	2603	2676	2664	2748	2745	2597	2596	2569	2610	2808	2567	2532	2192	2256	2431	2719	2505	2528	2394	2185
41.4833	2729	3073	2806	2870	3178	3050	3245	3173	2933	2977	2845	2695	2979	3121	3032	3205	2880	2944	2865	2851	3016	3035	2728	2736	2788	2882	2800	2987	3082	2784	2837	2855	2948	2950	2820	2793	2746	2797	3028	2731	2630	2254	2287	2553	2891	2695	2676	2513	2293
44.35	2791	3145	2883	2961	3317	3195	3369	3250	3050	3067	2923	2740	3059	3283	3159	3343	2908	2968	2923	2955	3093	3132	2832	2777	2873	2979	2933	3075	3143	2893	2947	2968	3084	3041	2917	2884	2878	2909	3156	2853	2665	2314	2322	2595	2998	2785	2794	2616	2401
48	2884	3334	3007	3059	3526	3370	3581	3417	3175	3178	3064	2809	3183	3488	3287	3488	2927	3035	2951	2968	3233	3261	2975	2887	2989	3083	3046	3244	3326	3018	3092	3095	3277	3212	3073	2993	3018	3066	3294	2940	2667	2330	2324	2643	3142	2917	2872	2692	2492
52.0333	2924	3436	3148	3212	3682	3508	3733	3622	3335	3321	3193	2940	3302	3641	3473	3712	2951	3141	2972	3007	3399	3386	3087	3049	3141	3244	3156	3392	3425	3147	3192	3206	3439	3346	3209	3118	3171	3209	3485	3154	2736	2385	2379	2659	3259	3036	3081	2855	2617
60	3068	3619	3390	3463	4045	3785	4047	3985	3573	3556	3406	3074	3615	3962	3740	4071	2961	3186	3073	3038	3635	3625	3358	3252	3365	3500	3402	3677	3718	3502	3489	3399	3762	3579	3455	3369	3512	3480	3749	3448	2704	2439	2377	2689	3470	3340	3392	3104	2878
65.4833	3174	3756	3554	3530	4281	3947	4340	4179	3665	3635	3529	3188	3731	4131	3883	4262	2947	3239	3061	3031	3673	3735	3479	3322	3510	3490	3548	3758	3725	3753	3510	3456	3904	3671	3507	3443	3632	3608	3860	3611	2702	2400	2362	2642	3510	3350	3637	3248	3062
68.35	3209	3845	3597	3546	4354	3985	4432	4248	3704	3714	3538	3226	3717	4167	3861	4391	2921	3177	3042	2982	3724	3747	3547	3395	3545	3536	3574	3830	3769	3861	3528	3462	3948	3615	3503	3508	3693	3688	3893	3670	2625	2425	2270	2616	3552	3438	3736	3310	3141
% INVADED
Elapsed (hr)	EGF control				no EGF control				p38i alone				JNKi alone				MEKi alone				CK2i alone				TAOK2i (583) alone				MLKi alone				TAOK2i+p38i				TAOK2i+JNKi				TAOK2i+MEKi				TAOK2i+MLKi				CK2i+p38i
0	0.696677	0.761421	2.84757	0.329489	0.747065	0.974026	1.0453	0.714286	0.906516	1.33025	1.24257	0.511364	0.461095	1.1879	0.600109	1.14548	0.430571	1.3905	0.452745	0.379198	1.09447	1.43678	0.630372	0.850822	0.733221	2.42839	1.12676	1.02447	0.837521	0.298507	0.658979	1.04338	0.46811	1.28056	0.840807	0.721785	0.872818	0.924784	0.485143	0.773694	1.2963	1.12882	1.5544	0.611621	1.45943	1.67832	1.34847	1.94175	2.16886
4.03333	0.401606	0.813008	1.23077	0.9	0.547264	0.559512	0.206186	0.553598	0.671835	1.33202	0.35879	0.582011	0.457085	0.722767	0.563236	1.38533	0.876766	0.907716	0.632578	0.749251	1.33402	1.20421	1.29102	0.541126	0.510204	0.934579	0.416884	0.538793	0.523834	0.859599	1.04548	1.30588	1.01064	1.26917	0.564392	0.375134	1.03448	0.687679	1.28617	0.758017	1.22019	0.509554	1.84414	0.785634	0.904255	1.44676	1.21528	0.513992	0.513479
8	0.330033	0.921234	0.745898	1.48681	0.56953	1.32075	0.38835	0.612053	1.27827	1.67544	1.0582	0.819252	0.920097	1.47638	0.865801	1.3507	0.963745	1.16335	1.19284	0.384431	1.2219	1.44648	0.725013	1.28337	0.636008	1.29482	0.758725	0.873587	1.09671	1.03486	1.28777	1.1544	0.821355	1.00908	0.401606	0.905888	1.07759	1.26166	0.877646	1.2318	1.61795	0.659472	1.36908	1.7666	1.03093	1.32377	1.20153	0.715072	0.3125
12	0.139018	1.59071	1.10153	0.329877	0.825309	0.902935	0.642792	0.648749	1.32953	2.01281	0.531658	1.13861	0.758294	1.7151	1.11266	1.14943	1.06477	1.39991	1.61982	0.960659	1.74446	1.44792	1.17532	2.09654	0.479846	0.762995	0.626204	1.5919	1.20424	1.17347	1.33907	2.01029	1.03653	1.11813	0.431241	1.02489	1.42706	1.16525	0.99108	0.964114	1.24813	1.30533	1.37363	1.38249	1.30814	2.25013	1.26649	0.890519	0.424242
17.4833	0.4363	2.2541	1.43627	0.699606	0.900515	1.06838	0.855798	0.518359	1.20751	2.92373	0.965517	1.09316	1.25	1.92912	1.35667	1.90311	1.29328	1.44742	0.934164	0.800674	1.87937	3.3522	0.960219	1.73059	0.800356	0.84482	0.403587	2.0316	1.19522	1.75012	0.760286	1.88934	1.24596	2.62673	0.424328	1.98065	1.6757	1.16633	1.3624	1.12967	1.50801	0.596206	1.53374	2	0.944669	2.46377	1.38958	0.604534	0.515464
20.35	0.34057	2.2664	1.88019	0.588483	0.57377	1.25366	0.666945	1.29545	1.64931	2.93501	1.18629	0.919118	1.42734	2.91096	1.18443	1.76174	1.27101	1.45044	0.909091	0.947672	2	2.98635	1.26354	3.13494	0.517688	0.978213	0.480769	1.6316	1.97679	2.45283	0.751215	1.8018	1.65252	1.71806	0.359712	1.48984	1.74941	1.29434	1.57756	1.10259	1.72492	0.78329	1.44638	2.50455	1.18473	2.90943	1.35005	0.589681	0.44843
24	0.169133	2.42093	2.04168	1.03135	1.18765	1.41529	0.886739	0.91853	1.49378	2.80602	1.57514	0.980829	1.371	2.9316	0.981595	1.83673	1.23211	1.83164	1.28364	0.682731	2.2449	3.35821	0.876424	2.2942	0.792327	1.1593	0.338266	2.17391	1.8055	2.78031	0.81826	2.66723	1.53912	1.95995	0.391986	1.44209	2.14652	1.71614	2.2356	1.7552	1.71958	0.800801	1.56786	1.89702	1.38889	3.21691	1.7035	0.571701	0.321027
28.0333	0.843035	2.69757	2.38487	0.876494	1.12317	1.29463	1.0598	0.814269	1.88151	2.88837	1.57611	1.40845	1.17361	3.82683	0.789266	2.76119	1.03567	1.66477	1.20579	1.03647	2.53165	3.29496	1.27065	2.72374	0.880705	0.991326	0.245198	2.25832	1.93676	3.18792	0.804829	3.48178	2.30169	2.9329	0.62474	1.38348	2.7027	2.09515	1.55193	2.24138	2	1.06848	1.25757	2.02936	1.86009	3.32168	2.0381	0.554529	0.310078
32	0.351288	2.9519	2.45902	0.582524	0.994318	1.4771	1.0745	0.839723	2.21628	2.97328	2.17476	1.44928	1.2112	3.42466	1.23549	3.12057	1.28252	1.592	1.25666	0.941265	2.785	4.51211	1.71779	3.6454	0.622326	0.833995	0.750988	2.38636	1.81146	3.98711	0.850735	3.61678	2.43624	2.1978	0.683829	1.70455	2.58197	2.6523	2.11321	2.12766	1.79812	1.1655	1.35563	2.32362	1.69819	3.34728	2.26244	0.537634	0.244021
36	0.490566	3.03453	2.3361	0.659582	1.25786	1.70394	0.935516	0.98673	2.37834	3.02276	1.96375	1.21951	1.1879	3.66748	1.72043	3.33895	1.56807	1.85847	1.02041	1.07953	3.4188	3.76688	1.61164	3.04228	0.985595	1.15801	1.09393	2.50091	1.73551	3.72647	0.971599	4.12913	2.36536	2.18579	0.924143	1.73344	2.45232	2.33716	1.38889	2.06467	2.1327	0.775547	1.32979	2.34471	1.58146	4.03194	2.05696	0.626566	0.411899
41.4833	0.366435	3.41686	2.77976	0.592334	0.881057	1.54098	1.1094	0.913962	2.42073	4.06449	2.39016	1.07607	1.34273	4.64595	1.38522	3.61934	1.45833	2.07201	1.36126	0.771659	3.11671	4.44811	1.75953	3.28947	0.573888	1.17974	0.464286	3.61567	2.14147	4.16667	1.2337	5.04378	2.34057	2.57627	0.992908	2.14823	2.98616	3.468	2.50991	2.92933	2.1673	1.02041	1.53039	3.13357	1.69492	4.78664	2.61584	0.756068	0.174444
44.35	0.609101	3.17965	3.12175	0.675447	0.994875	1.81534	1.03888	0.953846	2.4918	4.10825	2.29217	1.20438	1.07878	5.11727	1.45616	3.67933	1.20358	2.25741	1.43688	1.11675	2.55415	4.11877	1.9774	3.13288	1.0442	1.61128	0.78418	3.70732	2.44989	4.11338	1.32338	5.28976	2.20493	3.0582	0.822763	1.97642	2.74496	2.92197	2.02788	2.45356	2.06379	1.4261	1.46425	2.92871	2.1014	4.52424	2.97065	0.688073	0.333195
48	0.589459	3.41932	3.55836	0.75188	1.13443	1.86944	1.59173	1.17062	2.77165	3.99622	2.38251	1.42399	1.38234	5.38991	1.67326	4.09977	1.40075	2.20758	1.52491	1.14555	2.691	4.9678	1.98319	3.11742	0.869856	1.265	1.01773	3.88409	3.12688	4.93704	1.61708	5.42811	2.38023	3.08219	0.683371	2.33879	3.18091	3.62035	2.06436	2.51701	2.09974	1.28755	1.54905	2.72418	2.86442	4.86802	2.36769	0.742942	0.0401284
52.0333	0.683995	3.46333	4.03431	0.965131	1.46659	1.85291	1.47335	0.911099	2.69865	3.85426	2.63075	1.29252	1.15082	5.52046	2.33228	4.66056	1.49102	2.41961	1.78331	0.764882	3.05972	5.46367	1.91124	3.27976	0.891436	1.26387	0.697085	3.86203	2.65693	4.98888	1.31579	5.864	2.29718	3.10819	1.09068	2.18089	3.27972	3.77065	2.46772	2.88523	2.30263	1.174	1.63934	2.89583	2.51611	4.64427	2.62902	0.910683	0.191058
60	0.619296	4.00663	4.92625	0.750794	1.48331	1.98151	1.65555	1.12923	2.82676	3.90889	3.43511	1.43136	1.5491	5.77991	2.35294	4.98649	1.78994	2.4796	1.85486	0.954575	3.13618	6.01379	2.20369	4.21279	1.27786	1	0.411523	4.92249	3.60409	4.99714	1.66237	5.88408	2.68474	3.79994	0.723589	2.61205	3.67312	4.05172	2.72073	3.48028	2.10799	1.43501	1.64072	3.08665	3.14121	4.97006	2.83019	0.902062	0.312717
65.4833	0.661626	3.96699	4.92403	1.13314	1.56505	2.53357	2.07373	1.41182	2.7558	3.96149	3.14537	1.31744	1.98338	6.46333	2.54958	4.62224	1.73057	2.4699	1.69879	1.18773	2.69534	6.61312	2.06956	4.24443	1.11111	1.03152	1.07103	5.13571	3.19463	5.35572	2.13675	5.58449	2.51025	3.59575	0.427716	2.58495	3.3315	4.18514	2.87565	4.07089	2.03553	1.66667	1.65114	3.21726	3.21937	4.74627	3.4094	1.20074	0.359242
68.35	0.685572	4.05722	4.75396	0.761421	1.60772	2.03262	1.98556	1.17702	2.88877	3.958	3.30695	1.27092	1.64111	6.67147	2.6677	5.03302	1.91715	2.39219	1.84089	1.10664	2.57787	6.37844	2.17085	4.18262	0.818054	0.848416	0.643537	5.32637	3.29	4.921	1.8424	6.21028	2.63425	3.62379	0.513845	2.82212	3.3577	4.5282	2.54303	3.56948	2.28571	1.69072	1.71806	3.44037	3.40653	5.35195	3.77409	0.996979	0.350207
[truncated: 43 more columns]

## Sheet: Assay3
TOP
Elapsed (hr)	EGF 200ng/ml						no EGF						p38i 0.1uM				MEKi 1nM				MLKi 50nM				TAOK2 0.1uM				CK2i 10nM				p38i +TAOK2i				p38i +MEKi				p38i +MLKi				p38i +CK2i				TAOKi + MEKi
0	1190	1185	1265	1282	1201	1103	1345	1199	1166	1058	1275	1279	1470	1346	1167	1264	1157	1156	1267	1208	1265	1317	1235	1176	1234	1326	1270	1357	1291	1236	1313	1283	1475	1585	1559	1574	1599	1618	1697	1654	1578	1540	1538	1572	1449	1640	1568	1527	1503
3.38333	1454	1375	1416	1416	1348	1217	1492	1331	1400	1255	1485	1378	1721	1518	1319	1507	1400	1412	1481	1413	1523	1441	1395	1373	1500	1476	1383	1439	1428	1349	1411	1354	1692	1833	1713	1791	1779	1711	1866	1792	1750	1738	1727	1745	1653	1778	1756	1727	1724
7.35	1478	1473	1439	1461	1405	1279	1527	1384	1502	1316	1551	1440	1781	1636	1304	1596	1483	1485	1542	1478	1613	1492	1457	1422	1537	1531	1419	1483	1543	1415	1498	1427	1727	1892	1802	1876	1868	1783	1942	1871	1841	1815	1779	1826	1726	1863	1828	1803	1801
11.35	1538	1467	1492	1506	1447	1336	1631	1429	1493	1354	1588	1487	1820	1627	1290	1570	1542	1507	1561	1509	1639	1556	1512	1491	1632	1558	1505	1543	1519	1430	1548	1434	1787	1965	1834	1940	1919	1826	1986	1950	1916	1894	1823	1862	1796	1904	1799	1886	1847
17.6167	1538	1467	1530	1520	1429	1318	1585	1460	1499	1336	1583	1495	1843	1655	1262	1535	1571	1476	1586	1501	1631	1556	1526	1465	1615	1628	1549	1574	1534	1449	1511	1437	1731	1984	1871	1913	1948	1827	2052	1951	1931	1898	1823	1825	1809	1884	1820	1860	1875
21.15	1562	1451	1503	1510	1425	1307	1615	1445	1475	1309	1570	1496	1820	1620	1298	1558	1567	1533	1589	1534	1679	1554	1518	1464	1639	1602	1563	1546	1512	1429	1565	1404	1735	1993	1875	1936	1907	1843	2043	1989	1934	1912	1856	1870	1864	1912	1791	1873	1933
24	1539	1447	1509	1518	1404	1298	1601	1423	1414	1333	1540	1485	1880	1649	1280	1517	1581	1535	1552	1523	1656	1602	1529	1475	1611	1617	1565	1536	1569	1446	1567	1393	1748	1983	1915	1931	1993	1869	2005	2017	1951	1937	1836	1862	1816	1968	1827	1841	1895
27.3833	1510	1430	1490	1508	1386	1247	1599	1397	1432	1336	1525	1454	1855	1666	1237	1500	1531	1506	1574	1586	1612	1516	1487	1460	1582	1597	1546	1503	1537	1401	1526	1380	1762	1949	1882	1941	1946	1898	2039	2001	1980	1914	1811	1878	1799	1942	1824	1887	1906
31.35	1537	1444	1492	1491	1422	1267	1599	1437	1437	1344	1542	1459	1839	1703	1226	1486	1560	1527	1592	1627	1641	1553	1565	1461	1572	1614	1579	1530	1554	1401	1570	1327	1769	2000	1900	1933	2007	1936	2022	2078	2022	1939	1871	1897	1851	1993	1838	1944	1908
35.35	1576	1459	1519	1527	1460	1274	1671	1469	1441	1371	1555	1484	1865	1719	1254	1533	1597	1578	1612	1664	1652	1596	1609	1468	1589	1629	1592	1525	1560	1415	1602	1401	1764	2021	1873	1947	2046	2005	2086	2135	2049	1973	1878	1926	1919	1991	1875	1962	1960
41.6167	1612	1473	1575	1580	1515	1317	1708	1544	1497	1417	1645	1589	1939	1744	1295	1612	1660	1620	1645	1685	1713	1732	1662	1572	1594	1682	1649	1575	1621	1501	1673	1444	1847	2026	1982	1992	2142	2125	2258	2228	2203	2083	1956	2018	2017	2107	1979	2094	2019
45.15	1651	1496	1596	1646	1539	1352	1786	1597	1530	1441	1693	1642	2010	1775	1289	1657	1713	1647	1666	1713	1729	1788	1715	1585	1689	1706	1664	1571	1635	1527	1726	1469	1876	2099	1999	2012	2209	2232	2375	2310	2299	2190	2018	2109	2038	2174	2020	2140	2070
48	1662	1509	1615	1652	1551	1348	1796	1658	1567	1460	1723	1677	2030	1843	1309	1676	1769	1721	1670	1730	1755	1854	1736	1606	1718	1710	1747	1588	1679	1543	1737	1533	1929	2117	2057	2080	2292	2262	2434	2371	2337	2198	2094	2121	2079	2178	2077	2165	2134
51.3833	1707	1543	1642	1671	1576	1356	1885	1692	1600	1498	1746	1724	2109	1855	1326	1703	1803	1771	1697	1774	1808	1875	1805	1614	1752	1746	1738	1644	1714	1591	1750	1563	1916	2143	2117	2120	2314	2351	2505	2427	2400	2230	2123	2197	2056	2247	2118	2269	2186
55.35	1765	1568	1693	1710	1558	1364	1932	1751	1676	1540	1811	1743	2144	1908	1364	1765	1867	1762	1762	1844	1862	1899	1831	1674	1802	1768	1794	1662	1721	1581	1811	1566	1968	2219	2145	2174	2418	2407	2515	2507	2456	2312	2224	2209	2160	2312	2167	2285	2221
59.35	1804	1641	1718	1737	1605	1443	2042	1808	1747	1595	1844	1820	2182	1939	1399	1803	1881	1850	1832	1895	1928	1924	1905	1731	1797	1808	1850	1733	1743	1625	1829	1585	1982	2282	2231	2258	2509	2440	2618	2555	2564	2395	2273	2271	2212	2371	2253	2398	2298
65.8167	1864	1695	1795	1839	1657	1500	2164	1902	1826	1675	1928	1928	2267	2070	1446	1887	2005	1939	1926	1999	2045	2095	1943	1817	1872	1888	1923	1799	1832	1715	1947	1652	2021	2381	2309	2395	2663	2669	2812	2691	2754	2539	2385	2394	2290	2539	2399	2511	2443
69.15	1941	1722	1845	1872	1708	1474	2198	2021	1832	1735	1991	1995	2315	2087	1459	1914	2091	1935	1983	2013	2088	2132	2060	1883	1858	1950	1951	1844	1857	1742	1972	1626	2063	2428	2369	2444	2744	2701	2871	2817	2872	2597	2492	2424	2413	2597	2485	2599	2470
72	1983	1783	1853	1883	1739	1502	2215	2012	1864	1769	2018	2042	2290	2108	1488	1954	2133	2023	2030	2009	2115	2147	2051	1898	1858	1896	1956	1848	1872	1743	2016	1639	2003	2462	2415	2482	2783	2768	2871	2839	2916	2663	2523	2425	2404	2608	2568	2634	2506
BOTTO M
Elapsed (hr)	EGF 200ng/ml						no EGF						p38i 0.1uM				MEKi 1nM				MLKi 50nM				TAOK2 0.1uM				CK2i 10nM				p38i +TAOK2i				p38i +MEKi				p38i +MLKi				p38i +CK2i				TAOKi + MEKi
0	65	37	36	49	37	30	65	18	49	57	68	40	51	47	32	61	44	48	37	46	46	23	31	37	62	39	37	48	40	32	43	41	53	31	48	58	66	45	51	56	55	48	55	44	61	58	56	47	57
3.38333	12	21	25	12	12	20	29	20	8	20	30	35	6	14	19	37	14	23	14	13	14	16	21	34	27	41	11	30	21	20	26	26	16	23	22	27	8	22	19	20	17	31	12	15	31	13	36	13	17
7.35	18	18	18	25	10	20	25	13	5	13	24	44	15	24	13	22	8	22	18	20	18	5	13	28	32	29	13	16	26	23	11	26	18	27	37	22	16	39	25	22	15	39	14	24	20	23	13	19	27
11.35	21	16	25	31	19	31	22	29	13	10	9	38	14	29	12	20	20	25	29	19	8	7	25	19	20	34	26	22	33	32	26	38	15	22	38	24	25	31	18	25	15	32	14	25	14	24	27	18	25
17.6167	22	33	43	38	30	37	26	19	16	10	11	28	11	24	10	14	17	30	48	32	3	20	33	25	42	33	13	21	56	35	21	63	31	9	42	38	30	40	26	35	40	30	29	36	18	20	37	15	32
21.15	23	32	53	37	40	52	23	24	10	8	13	41	22	26	5	16	20	33	38	32	6	15	27	23	22	34	21	12	57	39	26	74	23	24	39	37	29	47	29	42	37	39	35	46	16	25	49	22	41
24	29	38	58	31	40	49	30	21	10	10	16	48	42	31	5	16	18	35	55	33	9	27	30	39	32	44	25	20	56	38	32	82	35	17	53	39	34	49	40	41	38	56	32	48	17	36	50	28	43
27.3833	21	31	59	37	43	55	37	29	8	18	11	50	25	38	10	15	29	42	61	31	10	26	37	46	26	40	30	32	69	56	38	79	55	21	69	52	47	47	37	43	40	50	37	60	30	32	74	26	45
31.35	18	42	78	41	47	59	50	45	22	18	12	55	32	51	9	24	27	50	69	48	10	23	36	54	25	67	39	15	85	56	47	98	42	15	83	63	50	46	43	57	41	58	46	71	25	33	77	26	47
35.35	27	54	78	52	54	65	48	47	13	13	11	69	41	56	17	27	33	53	77	53	24	29	47	65	46	78	51	24	90	79	41	104	44	14	83	73	57	52	49	53	42	74	51	75	18	51	98	33	49
41.6167	37	53	90	58	65	67	65	63	13	18	11	77	39	71	16	29	52	55	102	54	32	30	57	66	34	82	73	38	109	84	46	136	44	15	111	92	54	57	55	65	70	84	66	94	23	41	117	49	68
45.15	32	52	99	57	62	75	72	67	14	24	18	89	46	79	19	34	52	59	102	61	34	32	76	84	49	91	75	36	140	96	50	142	41	14	107	98	63	57	51	83	75	92	80	73	26	67	127	60	73
48	28	47	99	63	70	79	65	78	28	26	14	94	59	90	29	36	65	56	114	77	31	39	67	89	47	89	75	31	131	98	62	137	49	14	119	105	63	56	50	98	65	108	87	94	36	58	143	70	76
51.3833	37	71	116	90	81	99	70	74	13	23	20	96	57	90	25	39	53	69	114	75	32	44	72	90	48	126	84	42	133	115	58	164	47	12	129	110	78	66	62	77	81	105	93	89	30	70	153	80	95
55.35	35	59	125	76	73	98	79	89	20	19	25	117	53	107	13	42	62	91	111	84	41	46	74	105	54	125	87	42	156	129	66	181	51	13	120	122	70	73	54	84	82	101	106	107	41	82	157	84	74
59.35	33	72	133	85	78	106	78	87	10	22	29	128	95	101	13	34	63	72	121	113	38	51	85	104	58	125	79	49	171	131	82	194	48	9	119	133	80	75	62	104	92	114	119	110	54	89	191	96	88
65.8167	49	70	139	101	99	115	95	122	18	44	26	144	96	135	19	38	67	83	135	115	57	69	110	112	77	144	99	52	188	129	88	222	49	16	137	145	92	79	74	106	121	121	116	130	53	83	193	78	88
69.15	46	68	141	85	91	106	96	125	20	29	27	144	86	138	17	51	71	73	151	124	52	69	105	123	80	145	116	42	192	128	98	248	48	15	155	150	99	100	77	103	114	111	127	125	58	88	227	102	110
72	42	74	130	94	123	112	95	124	15	21	33	161	95	157	9	39	72	66	153	112	56	78	96	118	88	145	108	32	192	140	85	248	44	16	142	164	101	93	72	105	109	111	137	125	64	90	213	87	104
TOTAL
Elapsed (hr)	EGF 200ng/ml						no EGF						p38i 0.1uM				MEKi 1nM				MLKi 50nM				TAOK2 0.1uM				CK2i 10nM				p38i +TAOK2i				p38i +MEKi				p38i +MLKi				p38i +CK2i				TAOKi + MEKi
0	1255	1222	1301	1331	1238	1133	1410	1217	1215	1115	1343	1319	1521	1393	1199	1325	1201	1204	1304	1254	1311	1340	1266	1213	1296	1365	1307	1405	1331	1268	1356	1324	1528	1616	1607	1632	1665	1663	1748	1710	1633	1588	1593	1616	1510	1698	1624	1574	1560
3.38333	1466	1396	1441	1428	1360	1237	1521	1351	1408	1275	1515	1413	1727	1532	1338	1544	1414	1435	1495	1426	1537	1457	1416	1407	1527	1517	1394	1469	1449	1369	1437	1380	1708	1856	1735	1818	1787	1733	1885	1812	1767	1769	1739	1760	1684	1791	1792	1740	1741
7.35	1496	1491	1457	1486	1415	1299	1552	1397	1507	1329	1575	1484	1796	1660	1317	1618	1491	1507	1560	1498	1631	1497	1470	1450	1569	1560	1432	1499	1569	1438	1509	1453	1745	1919	1839	1898	1884	1822	1967	1893	1856	1854	1793	1850	1746	1886	1841	1822	1828
11.35	1559	1483	1517	1537	1466	1367	1653	1458	1506	1364	1597	1525	1834	1656	1302	1590	1562	1532	1590	1528	1647	1563	1537	1510	1652	1592	1531	1565	1552	1462	1574	1472	1802	1987	1872	1964	1944	1857	2004	1975	1931	1926	1837	1887	1810	1928	1826	1904	1872
17.6167	1560	1500	1573	1558	1459	1355	1611	1479	1515	1346	1594	1523	1854	1679	1272	1549	1588	1506	1634	1533	1634	1576	1559	1490	1657	1661	1562	1595	1590	1484	1532	1500	1762	1993	1913	1951	1978	1867	2078	1986	1971	1928	1852	1861	1827	1904	1857	1875	1907
21.15	1585	1483	1556	1547	1465	1359	1638	1469	1485	1317	1583	1537	1842	1646	1303	1574	1587	1566	1627	1566	1685	1569	1545	1487	1661	1636	1584	1558	1569	1468	1591	1478	1758	2017	1914	1973	1936	1890	2072	2031	1971	1951	1891	1916	1880	1937	1840	1895	1974
24	1568	1485	1567	1549	1444	1347	1631	1444	1424	1343	1556	1533	1922	1680	1285	1533	1599	1570	1607	1556	1665	1629	1559	1514	1643	1661	1590	1556	1625	1484	1599	1475	1783	2000	1968	1970	2027	1918	2045	2058	1989	1993	1868	1910	1833	2004	1877	1869	1938
27.3833	1531	1461	1549	1545	1429	1302	1636	1426	1440	1354	1536	1504	1880	1704	1247	1515	1560	1548	1635	1617	1622	1542	1524	1506	1608	1637	1576	1535	1606	1457	1564	1459	1817	1970	1951	1993	1993	1945	2076	2044	2020	1964	1848	1938	1829	1974	1898	1913	1951
31.35	1555	1486	1570	1532	1469	1326	1649	1482	1459	1362	1554	1514	1871	1754	1235	1510	1587	1577	1661	1675	1651	1576	1601	1515	1597	1681	1618	1545	1639	1457	1617	1425	1811	2015	1983	1996	2057	1982	2065	2135	2063	1997	1917	1968	1876	2026	1915	1970	1955
35.35	1603	1513	1597	1579	1514	1339	1719	1516	1454	1384	1566	1553	1906	1775	1271	1560	1630	1631	1689	1717	1676	1625	1656	1533	1635	1707	1643	1549	1650	1494	1643	1505	1808	2035	1956	2020	2103	2057	2135	2188	2091	2047	1929	2001	1937	2042	1973	1995	2009
41.6167	1649	1526	1665	1638	1580	1384	1773	1607	1510	1435	1656	1666	1978	1815	1311	1641	1712	1675	1747	1739	1745	1762	1719	1638	1628	1764	1722	1613	1730	1585	1719	1580	1891	2041	2093	2084	2196	2182	2313	2293	2273	2167	2022	2112	2040	2148	2096	2143	2087
45.15	1683	1548	1695	1703	1601	1427	1858	1664	1544	1465	1711	1731	2056	1854	1308	1691	1765	1706	1768	1774	1763	1820	1791	1669	1738	1797	1739	1607	1775	1623	1776	1611	1917	2113	2106	2110	2272	2289	2426	2393	2374	2282	2098	2182	2064	2241	2147	2200	2143
48	1690	1556	1714	1715	1621	1427	1861	1736	1595	1486	1737	1771	2089	1933	1338	1712	1834	1777	1784	1807	1786	1893	1803	1695	1765	1799	1822	1619	1810	1641	1799	1670	1978	2131	2176	2185	2355	2318	2484	2469	2402	2306	2181	2215	2115	2236	2220	2235	2210
51.3833	1744	1614	1758	1761	1657	1455	1955	1766	1613	1521	1766	1820	2166	1945	1351	1742	1856	1840	1811	1849	1840	1919	1877	1704	1800	1872	1822	1686	1847	1706	1808	1727	1963	2155	2246	2230	2392	2417	2567	2504	2481	2335	2216	2286	2086	2317	2271	2349	2281
55.35	1800	1627	1818	1786	1631	1462	2011	1840	1696	1559	1836	1860	2197	2015	1377	1807	1929	1853	1873	1928	1903	1945	1905	1779	1856	1893	1881	1704	1877	1710	1877	1747	2019	2232	2265	2296	2488	2480	2569	2591	2538	2413	2330	2316	2201	2394	2324	2369	2295
59.35	1837	1713	1851	1822	1683	1549	2120	1895	1757	1617	1873	1948	2277	2040	1412	1837	1944	1922	1953	2008	1966	1975	1990	1835	1855	1933	1929	1782	1914	1756	1911	1779	2030	2291	2350	2391	2589	2515	2680	2659	2656	2509	2392	2381	2266	2460	2444	2494	2386
65.8167	1913	1765	1934	1940	1756	1615	2259	2024	1844	1719	1954	2072	2363	2205	1465	1925	2072	2022	2061	2114	2102	2164	2053	1929	1949	2032	2022	1851	2020	1844	2035	1874	2070	2397	2446	2540	2755	2748	2886	2797	2875	2660	2501	2524	2343	2622	2592	2589	2531
69.15	1987	1790	1986	1957	1799	1580	2294	2146	1852	1764	2018	2139	2401	2225	1476	1965	2162	2008	2134	2137	2140	2201	2165	2006	1938	2095	2067	1886	2049	1870	2070	1874	2111	2443	2524	2594	2843	2801	2948	2920	2986	2708	2619	2549	2471	2685	2712	2701	2580
72	2025	1857	1983	1977	1862	1614	2310	2136	1879	1790	2051	2203	2385	2265	1497	1993	2205	2089	2183	2121	2171	2225	2147	2016	1946	2041	2064	1880	2064	1883	2101	1887	2047	2478	2557	2646	2884	2861	2943	2944	3025	2774	2660	2550	2468	2698	2781	2721	2610
%INVADED
Elapsed (hr)	EGF 200ng/ml						no EGF						p38i 0.1uM				MEKi 1nM				MLKi 50nM				TAOK2 0.1uM				CK2i 10nM				p38i +TAOK2i				p38i +MEKi				p38i +MLKi				p38i +CK2i				TAOKi + MEKi
0	5.17928	3.02782	2.7671	3.68144	2.98869	2.64784	4.60993	1.47905	4.03292	5.11211	5.06329	3.0326	3.35306	3.37401	2.66889	4.60377	3.66361	3.98671	2.83742	3.66826	3.50877	1.71642	2.44866	3.05029	4.78395	2.85714	2.83091	3.41637	3.00526	2.52366	3.17109	3.09668	3.46859	1.91832	2.98693	3.55392	3.96396	2.70595	2.91762	3.27485	3.36803	3.02267	3.45261	2.72277	4.03974	3.41578	3.44828	2.98602	3.65385
3.38333	0.818554	1.5043	1.73491	0.840336	0.882353	1.61681	1.90664	1.48038	0.568182	1.56863	1.9802	2.477	0.347423	0.913838	1.42003	2.39637	0.990099	1.60279	0.936455	0.911641	0.910865	1.09815	1.48305	2.41649	1.76817	2.7027	0.789096	2.04221	1.44928	1.46092	1.80932	1.88406	0.936768	1.23922	1.26801	1.48515	0.447678	1.26947	1.00796	1.10375	0.962083	1.7524	0.690052	0.852273	1.84086	0.725851	2.00893	0.747126	0.97645
7.35	1.20321	1.20724	1.23542	1.68237	0.706714	1.53965	1.61082	0.930565	0.331785	0.978179	1.52381	2.96496	0.835189	1.44578	0.987092	1.3597	0.536553	1.45985	1.15385	1.33511	1.10362	0.334001	0.884354	1.93103	2.03952	1.85897	0.907821	1.06738	1.65711	1.59944	0.72896	1.7894	1.03152	1.40698	2.01196	1.15911	0.849257	2.1405	1.27097	1.16218	0.80819	2.10356	0.780814	1.2973	1.14548	1.21951	0.706138	1.04281	1.47702
11.35	1.34702	1.07889	1.64799	2.01692	1.29604	2.26774	1.33091	1.98903	0.863214	0.733138	0.563557	2.4918	0.763359	1.75121	0.921659	1.25786	1.28041	1.63185	1.8239	1.24346	0.485732	0.447857	1.62655	1.25828	1.21065	2.13568	1.69824	1.40575	2.12629	2.18878	1.65184	2.58152	0.832408	1.1072	2.02991	1.222	1.28601	1.66936	0.898204	1.26582	0.7768	1.66147	0.762112	1.32485	0.773481	1.24481	1.47864	0.945378	1.33547
17.6167	1.41026	2.2	2.73363	2.43902	2.0562	2.73063	1.6139	1.28465	1.05611	0.742942	0.690088	1.83848	0.593312	1.42942	0.786164	0.903809	1.07053	1.99203	2.93758	2.08741	0.183599	1.26904	2.11674	1.67785	2.5347	1.98675	0.832266	1.31661	3.52201	2.35849	1.37076	4.2	1.75936	0.451581	2.1955	1.94772	1.51668	2.14247	1.2512	1.76234	2.02943	1.55602	1.56587	1.93444	0.985222	1.05042	1.99246	0.8	1.67803
21.15	1.4511	2.15779	3.40617	2.39173	2.73038	3.82634	1.40415	1.63376	0.673401	0.607441	0.821226	2.66753	1.19435	1.57959	0.38373	1.01652	1.26024	2.10728	2.33559	2.04342	0.356083	0.956023	1.74757	1.54674	1.3245	2.07824	1.32576	0.770218	3.63289	2.65668	1.63419	5.00677	1.3083	1.18989	2.03762	1.87532	1.49793	2.48677	1.39961	2.06795	1.87722	1.99897	1.85087	2.40084	0.851064	1.29066	2.66304	1.16095	2.077
24	1.84949	2.55892	3.70134	2.00129	2.77008	3.63771	1.83936	1.45429	0.702247	0.744602	1.02828	3.13112	2.18522	1.84524	0.389105	1.04371	1.1257	2.2293	3.42253	2.12082	0.540541	1.65746	1.92431	2.57596	1.94766	2.64901	1.57233	1.28535	3.44615	2.56065	2.00125	5.55932	1.96298	0.85	2.69309	1.9797	1.67736	2.55474	1.95599	1.99223	1.91051	2.80983	1.71306	2.51309	0.927441	1.79641	2.66383	1.49813	2.21878
27.3833	1.37165	2.12183	3.80891	2.39482	3.0091	4.22427	2.26161	2.03366	0.555556	1.32939	0.716146	3.32447	1.32979	2.23005	0.801925	0.990099	1.85897	2.71318	3.73089	1.91713	0.616523	1.68612	2.42782	3.05445	1.61692	2.44349	1.90355	2.08469	4.29639	3.84351	2.42967	5.41467	3.02697	1.06599	3.53665	2.60913	2.35825	2.41645	1.78227	2.10372	1.9802	2.54582	2.00216	3.09598	1.64024	1.62107	3.89884	1.35912	2.30651
31.35	1.15756	2.82638	4.96815	2.67624	3.19946	4.44947	3.03214	3.03644	1.50788	1.32159	0.772201	3.63276	1.71032	2.90764	0.728745	1.5894	1.70132	3.17058	4.15412	2.86567	0.605694	1.45939	2.24859	3.56436	1.56544	3.98572	2.41038	0.970874	5.18609	3.84351	2.90662	6.87719	2.31916	0.744417	4.18558	3.15631	2.43072	2.32089	2.08232	2.66979	1.9874	2.90436	2.39958	3.60772	1.33262	1.62883	4.02089	1.3198	2.40409
35.35	1.68434	3.56907	4.88416	3.29322	3.56671	4.85437	2.79232	3.10026	0.894085	0.939306	0.702427	4.44301	2.1511	3.15493	1.33753	1.73077	2.02454	3.24954	4.55891	3.08678	1.43198	1.78462	2.83816	4.24005	2.81346	4.56942	3.10408	1.54939	5.45455	5.28782	2.49544	6.9103	2.43363	0.687961	4.24335	3.61386	2.71041	2.52795	2.29508	2.4223	2.00861	3.61505	2.64386	3.74813	0.929272	2.49755	4.96706	1.65414	2.43902
41.6167	2.24378	3.47313	5.40541	3.5409	4.11392	4.84104	3.6661	3.92035	0.860927	1.25436	0.664251	4.62185	1.97169	3.91185	1.22044	1.76722	3.03738	3.28358	5.83858	3.10523	1.83381	1.70261	3.31588	4.0293	2.08845	4.64853	4.23926	2.35586	6.30058	5.29968	2.67597	8.60759	2.32681	0.734934	5.30339	4.41459	2.45902	2.61228	2.37786	2.83471	3.07963	3.87633	3.26409	4.45076	1.12745	1.90875	5.58206	2.28651	3.25827
45.15	1.90137	3.35917	5.84071	3.34703	3.87258	5.25578	3.87513	4.02644	0.906736	1.63823	1.05202	5.14154	2.23735	4.26106	1.4526	2.01064	2.94618	3.45838	5.76923	3.43856	1.92853	1.75824	4.24344	5.03295	2.81933	5.064	4.31282	2.2402	7.88732	5.91497	2.81532	8.8144	2.13876	0.662565	5.08072	4.64455	2.77289	2.49017	2.10223	3.46845	3.15922	4.03155	3.81316	3.34555	1.25969	2.98974	5.91523	2.72727	3.40644
48	1.6568	3.02057	5.77596	3.67347	4.31832	5.53609	3.49275	4.49309	1.75549	1.74966	0.805987	5.30774	2.82432	4.65598	2.16741	2.1028	3.54417	3.15138	6.39013	4.26121	1.73572	2.06022	3.71603	5.25074	2.66289	4.94719	4.11636	1.91476	7.23757	5.97197	3.44636	8.20359	2.47725	0.656969	5.46875	4.80549	2.67516	2.41588	2.01288	3.96922	2.70608	4.68343	3.989	4.24379	1.70213	2.59392	6.44144	3.13199	3.43891
51.3833	2.12156	4.39901	6.59841	5.11073	4.88835	6.80412	3.58056	4.19026	0.805952	1.51216	1.1325	5.27473	2.63158	4.62725	1.85048	2.23881	2.8556	3.75	6.29486	4.05625	1.73913	2.29286	3.83591	5.28169	2.66667	6.73077	4.61032	2.4911	7.20087	6.74091	3.20796	9.49624	2.39429	0.556845	5.74354	4.93274	3.26087	2.73066	2.41527	3.07508	3.26481	4.49679	4.19675	3.89326	1.43816	3.02115	6.73712	3.4057	4.16484
55.35	1.94444	3.62631	6.87569	4.25532	4.47578	6.70315	3.92839	4.83696	1.17925	1.21873	1.36166	6.29032	2.41238	5.31017	0.944081	2.32429	3.2141	4.91096	5.92632	4.35685	2.15449	2.36504	3.88451	5.90219	2.90948	6.60328	4.6252	2.46479	8.31113	7.54386	3.51625	10.3606	2.526	0.582437	5.29801	5.31359	2.8135	2.94355	2.10199	3.24199	3.23089	4.18566	4.54936	4.62003	1.86279	3.42523	6.75559	3.5458	3.2244
59.35	1.79641	4.20315	7.18531	4.6652	4.63458	6.84312	3.67925	4.59103	0.569152	1.36054	1.54832	6.57084	4.17216	4.95098	0.92068	1.85084	3.24074	3.7461	6.1956	5.62749	1.93286	2.58228	4.27136	5.66757	3.12668	6.46663	4.09539	2.74972	8.93417	7.46014	4.29095	10.905	2.36453	0.392842	5.06383	5.56253	3.09	2.98211	2.31343	3.91124	3.46386	4.54364	4.97492	4.61991	2.38305	3.61789	7.81506	3.84924	3.68818
65.8167	2.56142	3.96601	7.18718	5.20619	5.63781	7.12074	4.2054	6.02767	0.976139	2.55963	1.3306	6.94981	4.06263	6.12245	1.29693	1.97403	3.23359	4.10485	6.55022	5.43992	2.7117	3.18854	5.35801	5.80612	3.95074	7.08661	4.89614	2.80929	9.30693	6.99566	4.32432	11.8463	2.36715	0.667501	5.60098	5.70866	3.33938	2.87482	2.5641	3.78977	4.2087	4.54887	4.63814	5.15055	2.26206	3.16552	7.44599	3.01275	3.47689
69.15	2.31505	3.79888	7.0997	4.34338	5.05837	6.70886	4.18483	5.82479	1.07991	1.64399	1.33796	6.73212	3.58184	6.20225	1.15176	2.59542	3.284	3.63546	7.07591	5.80253	2.42991	3.13494	4.84988	6.13161	4.12797	6.92124	5.612	2.22694	9.37042	6.84492	4.7343	13.2337	2.2738	0.613999	6.14105	5.78258	3.48224	3.57015	2.61194	3.5274	3.81782	4.09897	4.84918	4.90388	2.34723	3.27747	8.37021	3.77638	4.26357
72	2.07407	3.98492	6.55572	4.75468	6.6058	6.93928	4.11255	5.80524	0.798297	1.17318	1.60897	7.30822	3.98323	6.93157	0.601202	1.95685	3.26531	3.15941	7.0087	5.28053	2.57946	3.50562	4.47136	5.85317	4.5221	7.10436	5.23256	1.70213	9.30233	7.43494	4.04569	13.1426	2.14949	0.645682	5.55338	6.19803	3.50208	3.25061	2.44648	3.56658	3.60331	4.00144	5.15038	4.90196	2.59319	3.3358	7.65912	3.19735	3.98467
[truncated: 23 more columns]

## Sheet: Assay4
TOP
Elapsed (hr)	EGF 200ng/ml						no EGF						p38i 0.1uM				TAOK2i 0.1uM				p38i + TAOK2i				MEKi 1nM				p38i + MEKi				MLKi 50nM				p38i + MLKi				CK2i 10nM				p38i + CK2i				TAOK2i + MEKi
0	1432	1300	1394	1425	1432	1373	1369	1522	1427	1479	1451	1377	1654	1643	1660	1694	1527	1513	1614	1517	1790	1882	1738	1808	1526	1526	1509	1504	1809	1690	1744	1713	1484	1474	1487	1693	1797	1913	1853	1870	1643	1584	1541	1389	1746	1694	1815	1796	1778
3.38333	1452	1324	1426	1435	1470	1395	1400	1561	1471	1539	1498	1404	1706	1684	1657	1759	1585	1560	1672	1548	1823	1937	1786	1872	1587	1588	1549	1520	1880	1779	1863	1784	1538	1498	1571	1781	1868	1955	1901	1882	1670	1634	1550	1425	1838	1767	1876	1867	1884
7.35	1607	1348	1493	1477	1518	1462	1488	1650	1500	1606	1528	1497	1796	1776	1755	1862	1629	1606	1755	1618	1926	2059	1888	1998	1686	1636	1627	1596	1993	1893	1924	1834	1636	1563	1636	1882	1984	2087	1998	1983	1727	1677	1634	1491	1908	1814	1990	2004	1958
11.35	1635	1337	1497	1490	1609	1523	1553	1701	1493	1660	1562	1539	1816	1863	1772	1849	1651	1624	1791	1646	2008	2117	1971	2047	1747	1695	1648	1604	2064	1969	1990	1932	1700	1605	1696	1895	2079	2116	2094	2043	1781	1718	1675	1527	2018	1850	2026	2047	2043
17.8167	1671	1376	1554	1512	1626	1562	1623	1785	1538	1755	1603	1598	1906	1853	1857	1885	1698	1690	1800	1696	2099	2170	1995	2019	1806	1751	1740	1652	2137	2001	2100	2020	1720	1660	1762	1947	2159	2193	2158	2091	1786	1754	1688	1593	2041	1901	2029	2105	2084
21.15	1660	1404	1574	1493	1585	1560	1660	1775	1547	1734	1557	1566	1913	1878	1835	1857	1707	1678	1824	1695	2108	2110	1986	2030	1861	1722	1732	1679	2171	2008	2128	2021	1703	1661	1776	1903	2171	2201	2151	2101	1804	1775	1694	1582	2044	1923	2042	2149	2073
24	1663	1380	1545	1457	1604	1547	1625	1776	1556	1740	1616	1559	1943	1859	1852	1858	1712	1651	1850	1721	2071	2117	2015	2028	1840	1719	1755	1692	2162	2010	2131	2035	1698	1672	1787	1893	2198	2216	2105	2061	1797	1792	1650	1555	2056	1927	2039	2139	2072
27.3833	1624	1377	1540	1403	1619	1564	1603	1764	1570	1740	1648	1547	1942	1855	1881	1839	1640	1621	1796	1740	2082	2076	1963	2014	1856	1724	1765	1665	2153	1985	2104	1997	1724	1658	1758	1889	2161	2230	2122	2049	1747	1773	1576	1510	2057	1920	2033	2126	2062
31.35	1583	1353	1509	1397	1618	1577	1675	1779	1592	1759	1658	1535	1970	1852	1865	1778	1665	1578	1810	1746	2043	2073	1966	1994	1860	1729	1749	1670	2197	2038	2146	1996	1735	1660	1739	1820	2211	2187	2096	2044	1745	1737	1565	1493	2091	1944	2032	2154	2066
35.35	1616	1376	1506	1404	1628	1612	1738	1777	1556	1801	1684	1563	1968	1915	1895	1807	1622	1572	1822	1783	2044	2062	1938	1959	1912	1750	1766	1716	2185	2047	2164	2064	1806	1668	1787	1872	2255	2251	2133	2026	1754	1775	1526	1499	2092	1980	2050	2156	2072
41.8167	1602	1363	1501	1392	1681	1603	1879	1824	1568	1873	1709	1583	2024	1933	1903	1827	1636	1565	1844	1787	2033	2086	1991	1980	1953	1768	1792	1736	2273	2147	2268	2070	1831	1704	1836	1909	2317	2297	2157	2106	1775	1739	1581	1514	2162	2037	2119	2206	2116
45.15	1597	1369	1477	1421	1694	1641	1929	1878	1632	1915	1738	1630	2048	1937	1954	1853	1641	1535	1843	1811	2056	2093	2005	2006	1995	1781	1840	1803	2288	2157	2264	2109	1867	1739	1871	1926	2370	2372	2200	2115	1783	1761	1562	1512	2206	2084	2111	2238	2134
48	1611	1383	1520	1388	1749	1616	1925	1923	1654	1969	1813	1654	2068	1973	1950	1849	1653	1567	1866	1837	2059	2123	1999	2013	2033	1803	1807	1803	2336	2203	2300	2135	1879	1729	1858	1921	2437	2403	2248	2145	1789	1806	1579	1485	2253	2062	2117	2296	2182
51.3833	1641	1408	1489	1434	1752	1670	1963	1993	1681	1997	1817	1726	2098	2010	1931	1898	1667	1562	1873	1816	2121	2153	2003	2040	2049	1789	1872	1820	2358	2230	2327	2180	1949	1756	1917	1974	2463	2399	2281	2234	1824	1800	1592	1501	2288	2119	2114	2299	2167
55.35	1634	1381	1509	1457	1765	1661	2038	2030	1731	2035	1873	1769	2123	2004	1956	1924	1691	1580	1878	1858	2133	2200	2038	2088	2065	1835	1961	1863	2425	2264	2414	2216	1955	1841	1937	2041	2524	2474	2319	2280	1810	1795	1635	1516	2318	2152	2166	2330	2225
59.35	1657	1425	1507	1491	1768	1657	2064	2076	1772	2095	1916	1756	2148	2046	2005	1973	1669	1586	1883	1865	2192	2216	2064	2141	2120	1878	1955	1914	2431	2320	2494	2249	2013	1830	1965	2059	2569	2541	2398	2350	1805	1841	1632	1552	2343	2216	2217	2357	2257
65.8167	1706	1448	1487	1441	1818	1689	2122	2139	1875	2222	2014	1806	2204	2066	2027	1971	1725	1617	1899	1856	2217	2239	2118	2140	2163	1888	2005	1957	2497	2340	2547	2378	2071	1869	2035	2107	2672	2689	2447	2416	1850	1874	1673	1535	2444	2257	2304	2380	2285
BOTTOM
Elapsed (hr)	EGF 200ng/ml						no EGF						p38i 0.1uM				TAOK2i 0.1uM				p38i + TAOK2i				MEKi 1nM				p38i + MEKi				MLKi 50nM				p38i + MLKi				CK2i 10nM				p38i + CK2i				TAOK2i + MEKi
0	39	38	65	64	49	51	55	69	60	27	65	61	70	58	69	69	54	62	47	57	65	75	50	61	39	46	60	49	65	42	65	46	28	34	37	51	69	54	58	63	70	70	78	40	38	52	60	34	58
3.38333	87	63	76	89	67	50	41	61	72	50	63	77	67	72	74	89	73	81	95	53	84	119	84	77	57	55	78	56	88	63	92	72	34	52	64	76	72	63	70	72	85	75	89	52	49	70	89	80	77
7.35	99	80	110	104	102	73	49	61	52	68	72	77	97	81	105	102	112	114	130	100	114	154	117	123	87	80	85	92	129	83	131	100	52	73	90	84	103	88	109	120	110	118	112	84	73	116	128	93	125
11.35	142	94	157	133	119	90	55	95	82	81	79	84	117	122	127	165	128	147	153	124	159	207	148	173	107	116	112	120	191	129	172	135	64	86	98	108	133	137	143	167	146	152	138	120	112	145	177	123	164
17.8167	167	137	194	201	162	126	69	114	91	104	94	111	169	161	182	225	163	230	189	170	222	291	225	260	154	144	136	169	244	197	222	185	106	144	145	170	179	188	206	226	198	187	213	163	181	197	259	217	215
21.15	210	155	209	211	198	154	76	144	92	103	116	122	200	174	219	247	182	283	226	200	251	310	233	264	169	177	155	190	290	240	248	197	129	155	165	188	224	239	245	236	220	206	229	198	193	222	262	215	249
24	227	179	246	208	220	163	78	148	92	113	138	148	229	214	210	250	224	283	259	210	284	333	242	329	177	182	179	207	298	251	276	225	151	166	186	222	267	258	275	245	258	267	287	221	235	248	278	256	257
27.3833	261	189	280	239	227	206	104	166	108	143	165	161	260	232	259	281	249	328	298	243	306	369	289	343	206	242	205	216	317	271	299	261	171	189	225	225	274	294	306	276	259	267	296	240	233	280	307	282	299
31.35	270	193	310	240	262	220	107	198	132	150	153	189	292	246	297	316	289	351	316	283	349	390	289	369	219	260	226	248	357	302	316	273	180	211	237	284	330	324	339	312	310	307	336	268	275	302	343	303	327
35.35	277	230	351	269	287	243	120	200	122	160	198	211	321	277	298	346	288	406	354	301	360	417	314	408	233	281	254	270	389	350	366	297	206	258	259	301	348	358	374	318	344	326	368	332	294	324	361	343	371
41.8167	325	254	397	296	330	320	166	242	166	194	223	243	334	341	363	378	361	446	401	371	425	494	363	466	262	324	287	328	460	385	407	331	260	307	274	361	427	425	422	375	377	421	380	381	354	375	415	416	440
45.15	364	268	420	321	378	338	179	269	174	218	197	249	374	337	386	403	400	472	449	397	447	513	410	460	276	352	307	350	478	414	430	355	261	336	304	381	445	469	475	407	433	480	403	398	374	412	437	449	453
48	370	292	457	326	390	353	201	276	190	199	213	265	384	360	409	416	391	488	477	424	438	537	453	482	296	363	304	364	505	458	430	358	289	339	343	399	458	506	527	442	477	501	412	427	396	465	481	456	430
51.3833	385	314	467	321	405	370	210	297	205	231	234	270	412	390	409	442	438	533	509	440	468	567	446	500	309	375	328	395	497	462	443	374	319	361	360	423	501	536	557	454	461	514	466	444	410	473	534	489	469
55.35	398	319	489	366	418	418	227	330	236	257	260	274	429	426	436	472	429	554	535	473	503	594	467	538	307	413	348	416	540	480	444	374	327	377	382	444	533	555	588	498	482	575	463	452	459	482	551	525	465
59.35	443	345	509	387	459	453	243	326	220	265	280	289	456	400	477	518	466	576	550	495	531	596	473	577	319	422	352	452	576	510	488	400	372	400	397	469	569	619	646	535	451	606	494	505	513	544	604	541	490
65.8167	447	360	538	404	489	452	269	357	267	291	319	325	472	459	513	505	473	606	597	538	572	639	536	573	323	460	411	497	639	559	508	425	409	452	474	488	635	690	751	585	488	640	497	524	531	564	658	611	543
TOTAL
Elapsed (hr)	EGF 200ng/ml						no EGF						p38i 0.1uM				TAOK2i 0.1uM				p38i + TAOK2i				MEKi 1nM				p38i + MEKi				MLKi 50nM				p38i + MLKi				CK2i 10nM				p38i + CK2i				TAOK2i + MEKi
0	1471	1338	1459	1489	1481	1424	1424	1591	1487	1506	1516	1438	1724	1701	1729	1763	1581	1575	1661	1574	1855	1957	1788	1869	1565	1572	1569	1553	1874	1732	1809	1759	1512	1508	1524	1744	1866	1967	1911	1933	1713	1654	1619	1429	1784	1746	1875	1830	1836
3.38333	1539	1387	1502	1524	1537	1445	1441	1622	1543	1589	1561	1481	1773	1756	1731	1848	1658	1641	1767	1601	1907	2056	1870	1949	1644	1643	1627	1576	1968	1842	1955	1856	1572	1550	1635	1857	1940	2018	1971	1954	1755	1709	1639	1477	1887	1837	1965	1947	1961
7.35	1706	1428	1603	1581	1620	1535	1537	1711	1552	1674	1600	1574	1893	1857	1860	1964	1741	1720	1885	1718	2040	2213	2005	2121	1773	1716	1712	1688	2122	1976	2055	1934	1688	1636	1726	1966	2087	2175	2107	2103	1837	1795	1746	1575	1981	1930	2118	2097	2083
11.35	1777	1431	1654	1623	1728	1613	1608	1796	1575	1741	1641	1623	1933	1985	1899	2014	1779	1771	1944	1770	2167	2324	2119	2220	1854	1811	1760	1724	2255	2098	2162	2067	1764	1691	1794	2003	2212	2253	2237	2210	1927	1870	1813	1647	2130	1995	2203	2170	2207
17.8167	1838	1513	1748	1713	1788	1688	1692	1899	1629	1859	1697	1709	2075	2014	2039	2110	1861	1920	1989	1866	2321	2461	2220	2279	1960	1895	1876	1821	2381	2198	2322	2205	1826	1804	1907	2117	2338	2381	2364	2317	1984	1941	1901	1756	2222	2098	2288	2322	2299
21.15	1870	1559	1783	1704	1783	1714	1736	1919	1639	1837	1673	1688	2113	2052	2054	2104	1889	1961	2050	1895	2359	2420	2219	2294	2030	1899	1887	1869	2461	2248	2376	2218	1832	1816	1941	2091	2395	2440	2396	2337	2024	1981	1923	1780	2237	2145	2304	2364	2322
24	1890	1559	1791	1665	1824	1710	1703	1924	1648	1853	1754	1707	2172	2073	2062	2108	1936	1934	2109	1931	2355	2450	2257	2357	2017	1901	1934	1899	2460	2261	2407	2260	1849	1838	1973	2115	2465	2474	2380	2306	2055	2059	1937	1776	2291	2175	2317	2395	2329
27.3833	1885	1566	1820	1642	1846	1770	1707	1930	1678	1883	1813	1708	2202	2087	2140	2120	1889	1949	2094	1983	2388	2445	2252	2357	2062	1966	1970	1881	2470	2256	2403	2258	1895	1847	1983	2114	2435	2524	2428	2325	2006	2040	1872	1750	2290	2200	2340	2408	2361
31.35	1853	1546	1819	1637	1880	1797	1782	1977	1724	1909	1811	1724	2262	2098	2162	2094	1954	1929	2126	2029	2392	2463	2255	2363	2079	1989	1975	1918	2554	2340	2462	2269	1915	1871	1976	2104	2541	2511	2435	2356	2055	2044	1901	1761	2366	2246	2375	2457	2393
35.35	1893	1606	1857	1673	1915	1855	1858	1977	1678	1961	1882	1774	2289	2192	2193	2153	1910	1978	2176	2084	2404	2479	2252	2367	2145	2031	2020	1986	2574	2397	2530	2361	2012	1926	2046	2173	2603	2609	2507	2344	2098	2101	1894	1831	2386	2304	2411	2499	2443
41.8167	1927	1617	1898	1688	2011	1923	2045	2066	1734	2067	1932	1826	2358	2274	2266	2205	1997	2011	2245	2158	2458	2580	2354	2446	2215	2092	2079	2064	2733	2532	2675	2401	2091	2011	2110	2270	2744	2722	2579	2481	2152	2160	1961	1895	2516	2412	2534	2622	2556
45.15	1961	1637	1897	1742	2072	1979	2108	2147	1806	2133	1935	1879	2422	2274	2340	2256	2041	2007	2292	2208	2503	2606	2415	2466	2271	2133	2147	2153	2766	2571	2694	2464	2128	2075	2175	2307	2815	2841	2675	2522	2216	2241	1965	1910	2580	2496	2548	2687	2587
48	1981	1675	1977	1714	2139	1969	2126	2199	1844	2168	2026	1919	2452	2333	2359	2265	2044	2055	2343	2261	2497	2660	2452	2495	2329	2166	2111	2167	2841	2661	2730	2493	2168	2068	2201	2320	2895	2909	2775	2587	2266	2307	1991	1912	2649	2527	2598	2752	2612
51.3833	2026	1722	1956	1755	2157	2040	2173	2290	1886	2228	2051	1996	2510	2400	2340	2340	2105	2095	2382	2256	2589	2720	2449	2540	2358	2164	2200	2215	2855	2692	2770	2554	2268	2117	2277	2397	2964	2935	2838	2688	2285	2314	2058	1945	2698	2592	2648	2788	2636
55.35	2032	1700	1998	1823	2183	2079	2265	2360	1967	2292	2133	2043	2552	2430	2392	2396	2120	2134	2413	2331	2636	2794	2505	2626	2372	2248	2309	2279	2965	2744	2858	2590	2282	2218	2319	2485	3057	3029	2907	2778	2292	2370	2098	1968	2777	2634	2717	2855	2690
59.35	2100	1770	2016	1878	2227	2110	2307	2402	1992	2360	2196	2045	2604	2446	2482	2491	2135	2162	2433	2360	2723	2812	2537	2718	2439	2300	2307	2366	3007	2830	2982	2649	2385	2230	2362	2528	3138	3160	3044	2885	2256	2447	2126	2057	2856	2760	2821	2898	2747
65.8167	2153	1808	2025	1845	2307	2141	2391	2496	2142	2513	2333	2131	2676	2525	2540	2476	2198	2223	2496	2394	2789	2878	2654	2713	2486	2348	2416	2454	3136	2899	3055	2803	2480	2321	2509	2595	3307	3379	3198	3001	2338	2514	2170	2059	2975	2821	2962	2991	2828
%INVADED
Elapsed (hr)	EGF 200ng/ml						no EGF						p38i 0.1uM				TAOK2i 0.1uM				p38i + TAOK2i				MEKi 1nM				p38i + MEKi				MLKi 50nM				p38i + MLKi				CK2i 10nM				p38i + CK2i				TAOK2i + MEKi
0	2.65126	2.84006	4.45511	4.29819	3.30858	3.58146	3.86236	4.3369	4.03497	1.79283	4.2876	4.242	4.06032	3.40976	3.99075	3.91378	3.41556	3.93651	2.82962	3.62135	3.50404	3.8324	2.79642	3.26378	2.49201	2.92621	3.82409	3.15518	3.46852	2.42494	3.59315	2.61512	1.85185	2.25464	2.42782	2.92431	3.69775	2.7453	3.03506	3.25918	4.0864	4.23216	4.81779	2.79916	2.13004	2.97824	3.2	1.85792	3.15904
3.38333	5.65302	4.54218	5.05992	5.8399	4.35914	3.46021	2.84525	3.76079	4.66623	3.14663	4.03587	5.19919	3.77891	4.10023	4.27499	4.81602	4.4029	4.93601	5.37634	3.31043	4.40482	5.78794	4.49198	3.95074	3.46715	3.34753	4.7941	3.5533	4.47154	3.4202	4.70588	3.87931	2.16285	3.35484	3.91437	4.09262	3.71134	3.1219	3.5515	3.68475	4.8433	4.38853	5.43014	3.52065	2.59671	3.81056	4.52926	4.10889	3.92657
7.35	5.80305	5.60224	6.86213	6.57812	6.2963	4.7557	3.18803	3.56517	3.35052	4.06213	4.5	4.89199	5.12414	4.36187	5.64516	5.19348	6.43308	6.62791	6.89655	5.82072	5.58824	6.95888	5.83541	5.79915	4.90694	4.662	4.96495	5.45024	6.07917	4.2004	6.3747	5.17063	3.08057	4.4621	5.21437	4.27263	4.93531	4.04598	5.17323	5.70613	5.98802	6.57382	6.41466	5.33333	3.68501	6.01036	6.04344	4.43491	6.00096
11.35	7.991	6.56883	9.49214	8.1947	6.88657	5.57967	3.4204	5.28953	5.20635	4.6525	4.81414	5.1756	6.05277	6.1461	6.68773	8.19265	7.19505	8.3004	7.87037	7.00565	7.33733	8.90706	6.98443	7.79279	5.77131	6.4053	6.36364	6.96056	8.47007	6.14871	7.9556	6.5312	3.62812	5.08575	5.46265	5.39191	6.01266	6.08078	6.39249	7.55656	7.57654	8.12834	7.61169	7.28597	5.25822	7.26817	8.0345	5.6682	7.4309
17.8167	9.08596	9.05486	11.0984	11.7338	9.0604	7.46445	4.07801	6.00316	5.58625	5.59441	5.53919	6.49503	8.14458	7.99404	8.92594	10.6635	8.75873	11.9792	9.50226	9.1104	9.56484	11.8245	10.1351	11.4085	7.85714	7.59894	7.24947	9.28062	10.2478	8.96269	9.56072	8.39002	5.80504	7.98226	7.60357	8.03023	7.65612	7.89584	8.71404	9.75399	9.97984	9.63421	11.2046	9.28246	8.14581	9.3899	11.3199	9.34539	9.35189
21.15	11.2299	9.94227	11.7218	12.3826	11.1049	8.98483	4.37788	7.50391	5.61318	5.60697	6.93365	7.22749	9.46522	8.47953	10.6621	11.7395	9.63473	14.4314	11.0244	10.5541	10.6401	12.8099	10.5002	11.5083	8.32512	9.3207	8.2141	10.1659	11.7838	10.6762	10.4377	8.88188	7.04148	8.53524	8.50077	8.99091	9.35282	9.79508	10.2254	10.0984	10.8696	10.3988	11.9085	11.1236	8.62763	10.3497	11.3715	9.09475	10.7235
24	12.0106	11.4817	13.7353	12.4925	12.0614	9.53216	4.58015	7.69231	5.58252	6.09822	7.86773	8.67018	10.5433	10.3232	10.1843	11.8596	11.5702	14.6329	12.2807	10.8752	12.0594	13.5918	10.7222	13.9584	8.77541	9.57391	9.25543	10.9005	12.1138	11.1013	11.4666	9.95575	8.16658	9.03156	9.42727	10.4965	10.8316	10.4285	11.5546	10.6245	12.5547	12.9675	14.8167	12.4437	10.2575	11.4023	11.9983	10.6889	11.0348
27.3833	13.8462	12.069	15.3846	14.5554	12.2969	11.6384	6.09256	8.60104	6.43623	7.59426	9.10094	9.42623	11.8074	11.1164	12.1028	13.2547	13.1816	16.8291	14.2311	12.2542	12.8141	15.092	12.833	14.5524	9.9903	12.3093	10.4061	11.4833	12.834	12.0124	12.4428	11.5589	9.02375	10.2328	11.3464	10.6433	11.2526	11.6482	12.603	11.871	12.9113	13.0882	15.812	13.7143	10.1747	12.7273	13.1197	11.711	12.6641
31.35	14.571	12.4838	17.0423	14.661	13.9362	12.2426	6.00449	10.0152	7.65661	7.85752	8.44837	10.9629	12.9089	11.7255	13.7373	15.0907	14.7902	18.196	14.8636	13.9478	14.5903	15.8343	12.816	15.6157	10.5339	13.0719	11.443	12.9301	13.9781	12.906	12.8351	12.0317	9.39948	11.2774	11.9939	13.4981	12.987	12.9032	13.922	13.2428	15.0852	15.0196	17.6749	15.2186	11.623	13.4461	14.4421	12.3321	13.6649
35.35	14.6329	14.3213	18.9015	16.0789	14.9869	13.0997	6.45856	10.1163	7.27056	8.1591	10.5207	11.894	14.0236	12.6369	13.5887	16.0706	15.0785	20.5258	16.2684	14.4434	14.975	16.8213	13.9432	17.237	10.8625	13.8355	12.5743	13.5952	15.1127	14.6016	14.4664	12.5794	10.2386	13.3956	12.6588	13.8518	13.3692	13.7217	14.9182	13.5666	16.3966	15.5164	19.4298	18.1322	12.3219	14.0625	14.973	13.7255	15.1862
41.8167	16.8656	15.7081	20.9168	17.5355	16.4097	16.6407	8.11736	11.7135	9.57324	9.38558	11.5424	13.3078	14.1645	14.9956	16.0194	17.1429	18.0771	22.178	17.8619	17.1918	17.2905	19.1473	15.4206	19.0515	11.8284	15.4876	13.8047	15.8915	16.8313	15.2054	15.215	13.7859	12.4342	15.266	12.9858	15.9031	15.5612	15.6135	16.3629	15.1149	17.5186	19.4907	19.3779	20.1055	14.07	15.5473	16.3773	15.8658	17.2144
45.15	18.562	16.3714	22.1402	18.4271	18.2432	17.0793	8.49146	12.5291	9.63455	10.2203	10.1809	13.2517	15.4418	14.8197	16.4957	17.8635	19.5982	23.5177	19.5899	17.9801	17.8586	19.6853	16.9772	18.6537	12.1532	16.5026	14.299	16.2564	17.2813	16.1027	15.9614	14.4075	12.265	16.1928	13.977	16.515	15.8082	16.5083	17.757	16.138	19.5397	21.419	20.5089	20.8377	14.4961	16.5064	17.1507	16.7101	17.5106
48	18.6774	17.4328	23.1158	19.0198	18.2328	17.9279	9.45437	12.5512	10.3037	9.17897	10.5133	13.8093	15.6607	15.4308	17.3379	18.3664	19.1292	23.747	20.3585	18.7528	17.541	20.188	18.4747	19.3186	12.7093	16.759	14.4008	16.7974	17.7754	17.2116	15.7509	14.3602	13.3303	16.3926	15.5838	17.1983	15.8204	17.3943	18.991	17.0854	21.0503	21.7165	20.6931	22.3326	14.949	18.4013	18.5142	16.5698	16.4625
51.3833	19.003	18.2346	23.8753	18.2906	18.7761	18.1373	9.66406	12.9694	10.8696	10.368	11.4091	13.5271	16.4143	16.25	17.4786	18.8889	20.8076	25.4415	21.3686	19.5035	18.0765	20.8456	18.2115	19.685	13.1043	17.329	14.9091	17.833	17.4081	17.162	15.9928	14.6437	14.0653	17.0524	15.8103	17.6471	16.9028	18.2624	19.6265	16.8899	20.1751	22.2126	22.6433	22.8278	15.1964	18.2485	20.1662	17.5395	17.7921
55.35	19.5866	18.7647	24.4745	20.0768	19.148	20.1058	10.0221	13.9831	11.998	11.2129	12.1894	13.4116	16.8103	17.5309	18.2274	19.6995	20.2358	25.9606	22.1716	20.2917	19.0819	21.2598	18.6427	20.4874	12.9427	18.3719	15.0715	18.2536	18.2125	17.4927	15.5353	14.4402	14.3295	16.9973	16.4726	17.8672	17.4354	18.3229	20.227	17.9266	21.0297	24.2616	22.0686	22.9675	16.5286	18.2992	20.2797	18.3888	17.2862
59.35	21.0952	19.4915	25.248	20.607	20.6107	21.4692	10.5332	13.572	11.0442	11.2288	12.7505	14.132	17.5115	16.3532	19.2184	20.7949	21.8267	26.642	22.6058	20.9746	19.5006	21.1949	18.6441	21.2288	13.0791	18.3478	15.2579	19.104	19.1553	18.0212	16.3649	15.1	15.5975	17.9372	16.8078	18.5522	18.1326	19.5886	21.2221	18.5442	19.9911	24.765	23.2361	24.5503	17.9622	19.7101	21.4108	18.668	17.8376
65.8167	20.7617	19.9115	26.5679	21.897	21.1964	21.1116	11.2505	14.3029	12.465	11.5798	13.6734	15.2511	17.6383	18.1782	20.1969	20.3958	21.5196	27.2605	23.9183	22.4728	20.5091	22.2029	20.1959	21.1205	12.9928	19.5911	17.0116	20.2526	20.3763	19.2825	16.6285	15.1623	16.4919	19.4744	18.892	18.8054	19.2017	20.4202	23.4834	19.4935	20.8725	25.4574	22.9032	25.4492	17.8487	19.9929	22.2147	20.428	19.2008
[truncated: 23 more columns]

## Sheet: Assay5
TOP	Elapsed (hr)	MEKi 1nM			MLKi 50nM			TAOKi 0.1uM			CK2i 10nM			MEKi + MLKi			TAOKi + CK2i			MEKi + MLKi + TAOK2			MEKi + MLKi + CK2i			TAOKi + CK2i + MEKi			TAOKi + CK2i + MLKi			MEKi + MLKi + TAOKi + CK2i			EGF control			no EGF control
	0	1714	1751	1701	1711	1754	1775	1723	1789	1810	1820	1676	1829	1507	1759	1736	1689	1754	1766	1762	1692	1653	1720	1687	1537	1719	1632	1716	1694	1660	1696	1681	1617	1659	1668	1544	1776	1458	1590	1603
	2.85	1793	1809	1764	1740	1772	1796	1772	1863	1874	1906	1751	1887	1598	1829	1800	1774	1787	1836	1809	1751	1750	1793	1717	1571	1778	1701	1753	1728	1699	1755	1742	1713	1709	1745	1581	1895	1510	1656	1668
	6.23333	1916	1925	1865	1785	1878	1871	1852	1945	1939	1963	1809	1968	1670	1917	1847	1884	1887	1919	1908	1799	1848	1875	1774	1650	1816	1747	1833	1869	1801	1881	1818	1759	1781	1800	1655	1945	1575	1733	1703
	10.2	1969	1995	1947	1877	1933	2011	1950	2041	2029	2029	1868	2091	1692	2013	1901	1917	1985	1998	2006	1909	1952	1938	1809	1683	1956	1765	1927	1924	1823	1962	1885	1840	1862	1913	1743	2024	1617	1794	1771
	14.2	2041	2038	1985	1954	2047	2004	1986	2101	2104	2058	1916	2089	1769	2076	1977	1978	1998	2025	2027	1943	1996	2003	1865	1750	2006	1793	1994	1995	1835	1978	1952	1898	1883	1962	1757	2062	1627	1866	1815
	20.6667	2087	2068	2069	1974	2065	2051	2005	2084	2094	2121	1961	2111	1823	2147	2032	2004	1993	2054	2064	1948	2063	2041	1823	1744	2081	1865	2024	2012	1911	1989	2022	1915	1958	2003	1793	2058	1629	1848	1850
	24	2115	2055	2091	1973	2033	2034	2004	2048	2005	2092	1907	2017	1806	2137	2007	1965	2002	2029	2033	1906	2083	2028	1771	1756	1981	1834	1996	1988	1887	2037	1947	1902	1930	1939	1759	2036	1582	1834	1852
	26.85	2027	1996	2029	1954	1990	1974	1952	2016	2011	2094	1916	1998	1827	2124	2005	1926	1961	1950	2045	1895	2044	2008	1768	1713	1991	1828	1940	1955	1843	1957	1939	1882	1922	1926	1731	1948	1555	1821	1810
	30.2333	2016	1965	1995	1877	1989	1888	1904	1946	1911	2035	1835	1957	1805	2112	1988	1923	1916	1913	2014	1856	2061	1981	1757	1716	1923	1799	1962	1905	1824	1954	1908	1877	1912	1873	1712	1888	1523	1836	1798
	34.2	2043	1987	2053	1872	1956	1913	1872	1892	1873	1957	1791	1913	1860	2122	1979	1860	1809	1881	1995	1853	2092	1980	1756	1695	1917	1821	1969	1849	1800	1903	1935	1866	1906	1842	1624	1845	1471	1821	1785
	38.2	2002	1960	2018	1893	1936	1879	1838	1826	1857	1941	1754	1877	1849	2141	1987	1856	1792	1856	2010	1857	2072	1969	1817	1723	1919	1775	1965	1834	1780	1862	1971	1866	1951	1863	1611	1810	1462	1806	1788
	44.6667	2037	2007	2077	1862	1945	1917	1868	1797	1834	1888	1761	1856	1918	2215	2060	1848	1774	1857	2003	1908	2114	2031	2129	1889	1913	1794	2003	1861	1792	1863	2000	1960	1959	1885	1576	1763	1590	1875	1830
	48	2103	2056	2081	1895	1938	1936	1824	1802	1890	1863	1746	1886	1940	2180	2072	1838	1759	1819	2025	1931	2142	2020	2170	1933	1883	1820	2020	1883	1828	1902	2036	1992	1980	1889	1565	1776	1625	1880	1889
	50.85	2100	2039	2059	1887	1966	1963	1863	1854	1908	1880	1766	1879	1964	2231	2103	1821	1796	1839	2093	1949	2181	2077	2215	1941	1891	1813	1995	1912	1850	1897	2051	2038	2053	1889	1570	1733	1636	1946	1894
	54.2333	2104	2116	2091	1906	1976	1987	1865	1850	1931	1891	1791	1884	2008	2295	2134	1832	1829	1833	2123	1994	2247	2071	2247	1950	1959	1737	2026	1925	1867	1963	2074	2107	2074	1901	1578	1745	1701	1995	1957
	58.2	2134	2109	2124	1949	2031	2047	1875	1879	1899	1893	1860	1910	2086	2374	2219	1843	1853	1840	2185	2024	2256	2179	2293	2015	1979	1809	2029	1937	1901	1962	2122	2116	2131	1876	1588	1771	1718	2054	1996
	62.2	2201	2119	2181	2039	2076	2106	1923	1869	1949	1952	1843	1952	2117	2422	2267	1855	1876	1866	2255	2091	2330	2221	2369	2070	2016	1818	2063	1949	1915	1977	2188	2207	2181	1885	1621	1793	1772	2133	2027
	68.6667	2222	2261	2219	2091	2123	2104	1930	1890	1975	1978	1881	2013	2229	2505	2376	1904	1886	1867	2334	2160	2464	2276	2512	2126	2119	1927	2103	1984	1940	2045	2259	2251	2240	1895	1625	1829	1827	2152	2068
BOTTOM	Elapsed (hr)	MEKi 1nM			MLKi 50nM			TAOKi 0.1uM			CK2i 10nM			MEKi + MLKi			TAOKi + CK2i			MEKi + MLKi + TAOK2			MEKi + MLKi + CK2i			TAOKi + CK2i + MEKi			TAOKi + CK2i + MLKi			MEKi + MLKi + TAOKi + CK2i			EGF control			no EGF control
	0	44	23	25	39	36	30	43	42	31	45	35	42	48	46	32	28	27	32	34	65	31	60	38	44	39	56	39	33	40	31	32	27	30	46	58	50	56	53	49
	2.85	62	28	25	53	43	41	45	72	58	55	40	48	53	41	36	24	43	40	38	61	34	51	39	36	46	65	33	38	47	32	25	35	34	60	53	56	55	61	66
	6.23333	64	46	27	73	50	55	45	61	62	57	38	66	68	46	43	36	54	57	60	73	42	61	59	46	60	87	38	54	73	42	21	43	38	82	61	75	52	59	61
	10.2	67	61	41	95	72	76	87	75	86	90	58	87	98	75	72	45	84	73	79	71	65	75	73	55	102	92	60	65	76	58	36	59	54	89	81	104	64	83	63
	14.2	97	96	70	116	116	111	122	114	129	124	90	124	111	102	87	73	112	114	110	107	101	102	85	79	134	132	78	95	89	68	56	81	82	97	106	146	76	74	68
	20.6667	135	142	133	153	157	165	162	161	166	187	155	178	142	153	141	129	163	169	148	156	149	167	141	105	184	207	149	169	122	124	112	133	120	144	152	202	91	116	122
	24	165	166	154	186	196	188	206	198	221	217	195	224	186	164	169	156	201	208	191	197	162	185	148	116	215	221	177	192	149	163	129	161	141	155	185	235	106	143	124
	26.85	181	183	174	208	203	219	235	226	226	259	223	227	194	194	177	196	240	221	213	196	209	215	180	154	234	230	195	250	175	181	147	183	152	204	218	239	113	150	125
	30.2333	211	230	213	247	252	258	270	256	258	269	238	268	201	245	198	215	266	249	242	231	219	263	191	157	237	251	235	258	199	202	181	228	188	230	257	272	126	168	141
	34.2	225	250	250	271	258	283	309	286	280	302	265	306	209	272	251	270	278	292	282	280	258	284	229	186	291	284	279	306	241	261	214	245	209	248	273	288	134	177	167
	38.2	262	283	281	304	277	328	338	328	314	356	300	321	247	301	278	310	314	329	301	302	273	304	253	215	308	313	338	334	269	303	238	300	233	295	312	325	143	213	177
	44.6667	274	315	324	346	326	354	371	362	364	407	359	367	250	329	317	368	356	367	332	347	322	363	311	268	327	351	368	399	310	361	291	337	285	349	355	375	186	218	204
	48	286	328	371	341	372	385	393	380	397	419	379	418	268	350	316	388	343	377	352	345	336	387	347	281	345	374	404	428	352	406	313	354	283	378	368	396	202	227	223
	50.85	299	342	382	363	361	404	434	405	393	449	388	404	273	380	316	376	375	400	375	364	345	380	354	303	385	362	425	407	350	401	326	348	301	374	401	411	208	228	234
	54.2333	302	351	413	361	373	431	446	439	404	477	414	421	296	382	350	428	376	403	408	388	378	394	361	316	373	405	432	476	373	445	354	375	306	376	407	450	225	249	225
	58.2	328	369	432	371	414	439	451	435	440	472	402	451	315	397	350	434	377	435	416	418	417	419	378	315	392	420	461	505	397	464	353	391	351	425	426	491	227	257	263
	62.2	330	402	471	383	430	465	465	478	451	494	424	488	296	412	373	472	390	431	448	442	418	437	398	353	396	391	467	514	424	489	375	393	381	446	470	499	232	254	258
	68.6667	348	412	498	428	452	459	493	479	477	523	449	506	328	425	382	495	423	454	483	447	417	489	411	397	407	407	485	529	457	523	390	429	424	460	467	519	232	289	276
BOTTOM + TOP	Elapsed (hr)	MEKi 1nM			MLKi 50nM			TAOKi 0.1uM			CK2i 10nM			MEKi + MLKi			TAOKi + CK2i			MEKi + MLKi + TAOK2			MEKi + MLKi + CK2i			TAOKi + CK2i + MEKi			TAOKi + CK2i + MLKi			MEKi + MLKi + TAOKi + CK2i			EGF control			no EGF control
	0	1758	1774	1726	1750	1790	1805	1766	1831	1841	1865	1711	1871	1555	1805	1768	1717	1781	1798	1796	1757	1684	1780	1725	1581	1758	1688	1755	1727	1700	1727	1713	1644	1689	1714	1602	1826	1514	1643	1652
	2.85	1855	1837	1789	1793	1815	1837	1817	1935	1932	1961	1791	1935	1651	1870	1836	1798	1830	1876	1847	1812	1784	1844	1756	1607	1824	1766	1786	1766	1746	1787	1767	1748	1743	1805	1634	1951	1565	1717	1734
	6.23333	1980	1971	1892	1858	1928	1926	1897	2006	2001	2020	1847	2034	1738	1963	1890	1920	1941	1976	1968	1872	1890	1936	1833	1696	1876	1834	1871	1923	1874	1923	1839	1802	1819	1882	1716	2020	1627	1792	1764
	10.2	2036	2056	1988	1972	2005	2087	2037	2116	2115	2119	1926	2178	1790	2088	1973	1962	2069	2071	2085	1980	2017	2013	1882	1738	2058	1857	1987	1989	1899	2020	1921	1899	1916	2002	1824	2128	1681	1877	1834
	14.2	2138	2134	2055	2070	2163	2115	2108	2215	2233	2182	2006	2213	1880	2178	2064	2051	2110	2139	2137	2050	2097	2105	1950	1829	2140	1925	2072	2090	1924	2046	2008	1979	1965	2059	1863	2208	1703	1940	1883
	20.6667	2222	2210	2202	2127	2222	2216	2167	2245	2260	2308	2116	2289	1965	2300	2173	2133	2156	2223	2212	2104	2212	2208	1964	1849	2265	2072	2173	2181	2033	2113	2134	2048	2078	2147	1945	2260	1720	1964	1972
	24	2280	2221	2245	2159	2229	2222	2210	2246	2226	2309	2102	2241	1992	2301	2176	2121	2203	2237	2224	2103	2245	2213	1919	1872	2196	2055	2173	2180	2036	2200	2076	2063	2071	2094	1944	2271	1688	1977	1976
	26.85	2208	2179	2203	2162	2193	2193	2187	2242	2237	2353	2139	2225	2021	2318	2182	2122	2201	2171	2258	2091	2253	2223	1948	1867	2225	2058	2135	2205	2018	2138	2086	2065	2074	2130	1949	2187	1668	1971	1935
	30.2333	2227	2195	2208	2124	2241	2146	2174	2202	2169	2304	2073	2225	2006	2357	2186	2138	2182	2162	2256	2087	2280	2244	1948	1873	2160	2050	2197	2163	2023	2156	2089	2105	2100	2103	1969	2160	1649	2004	1939
	34.2	2268	2237	2303	2143	2214	2196	2181	2178	2153	2259	2056	2219	2069	2394	2230	2130	2087	2173	2277	2133	2350	2264	1985	1881	2208	2105	2248	2155	2041	2164	2149	2111	2115	2090	1897	2133	1605	1998	1952
	38.2	2264	2243	2299	2197	2213	2207	2176	2154	2171	2297	2054	2198	2096	2442	2265	2166	2106	2185	2311	2159	2345	2273	2070	1938	2227	2088	2303	2168	2049	2165	2209	2166	2184	2158	1923	2135	1605	2019	1965
	44.6667	2311	2322	2401	2208	2271	2271	2239	2159	2198	2295	2120	2223	2168	2544	2377	2216	2130	2224	2335	2255	2436	2394	2440	2157	2240	2145	2371	2260	2102	2224	2291	2297	2244	2234	1931	2138	1776	2093	2034
	48	2389	2384	2452	2236	2310	2321	2217	2182	2287	2282	2125	2304	2208	2530	2388	2226	2102	2196	2377	2276	2478	2407	2517	2214	2228	2194	2424	2311	2180	2308	2349	2346	2263	2267	1933	2172	1827	2107	2112
	50.85	2399	2381	2441	2250	2327	2367	2297	2259	2301	2329	2154	2283	2237	2611	2419	2197	2171	2239	2468	2313	2526	2457	2569	2244	2276	2175	2420	2319	2200	2298	2377	2386	2354	2263	1971	2144	1844	2174	2128
	54.2333	2406	2467	2504	2267	2349	2418	2311	2289	2335	2368	2205	2305	2304	2677	2484	2260	2205	2236	2531	2382	2625	2465	2608	2266	2332	2142	2458	2401	2240	2408	2428	2482	2380	2277	1985	2195	1926	2244	2182
	58.2	2462	2478	2556	2320	2445	2486	2326	2314	2339	2365	2262	2361	2401	2771	2569	2277	2230	2275	2601	2442	2673	2598	2671	2330	2371	2229	2490	2442	2298	2426	2475	2507	2482	2301	2014	2262	1945	2311	2259
	62.2	2531	2521	2652	2422	2506	2571	2388	2347	2400	2446	2267	2440	2413	2834	2640	2327	2266	2297	2703	2533	2748	2658	2767	2423	2412	2209	2530	2463	2339	2466	2563	2600	2562	2331	2091	2292	2004	2387	2285
	68.6667	2570	2673	2717	2519	2575	2563	2423	2369	2452	2501	2330	2519	2557	2930	2758	2399	2309	2321	2817	2607	2881	2765	2923	2523	2526	2334	2588	2513	2397	2568	2649	2680	2664	2355	2092	2348	2059	2441	2344
% invaded	Elapsed (hr)	MEKi 1nM			MLKi 50nM			TAOKi 0.1uM			CK2i 10nM			MEKi + MLKi			TAOKi + CK2i			MEKi + MLKi + TAOK2			MEKi + MLKi + CK2i			TAOKi + CK2i + MEKi			TAOKi + CK2i + MLKi			MEKi + MLKi + TAOKi + CK2i			EGF control			no EGF control
	0	2.50284	1.29651	1.44844	2.22857	2.01117	1.66205	2.43488	2.29383	1.68387	2.41287	2.04559	2.24479	3.08682	2.54848	1.80995	1.63075	1.516	1.77976	1.8931	3.69949	1.84086	3.37079	2.2029	2.78305	2.21843	3.31754	2.22222	1.91083	2.35294	1.79502	1.86807	1.64234	1.7762	2.68378	3.62047	2.73823	3.69881	3.22581	2.9661
	2.85	3.34232	1.52422	1.39743	2.95594	2.36915	2.2319	2.47661	3.72093	3.00207	2.80469	2.23339	2.48062	3.21018	2.19251	1.96078	1.33482	2.34973	2.1322	2.05739	3.36645	1.90583	2.76573	2.22096	2.2402	2.52193	3.68063	1.8477	2.15176	2.69187	1.79071	1.41483	2.00229	1.95066	3.3241	3.24357	2.87032	3.51438	3.55271	3.80623
	6.23333	3.23232	2.33384	1.42706	3.92896	2.59336	2.85566	2.37217	3.04088	3.09845	2.82178	2.05739	3.24484	3.91254	2.34335	2.27513	1.875	2.78207	2.88462	3.04878	3.89957	2.22222	3.15083	3.21877	2.71226	3.19829	4.74373	2.031	2.80811	3.89541	2.18409	1.14192	2.38624	2.08906	4.35707	3.55478	3.71287	3.19607	3.29241	3.45805
	10.2	3.29077	2.96693	2.06237	4.81744	3.59102	3.64159	4.27099	3.54442	4.06619	4.24729	3.01142	3.99449	5.47486	3.59195	3.64927	2.29358	4.05993	3.52487	3.78897	3.58586	3.22261	3.72578	3.87885	3.16456	4.95627	4.95423	3.01963	3.26797	4.00211	2.87129	1.87402	3.1069	2.81837	4.44555	4.44079	4.88722	3.80726	4.42195	3.43511
	14.2	4.53695	4.49859	3.40633	5.60386	5.36292	5.24823	5.78748	5.14673	5.77698	5.68286	4.48654	5.60325	5.90426	4.6832	4.21512	3.55924	5.30806	5.32959	5.1474	5.21951	4.8164	4.84561	4.35897	4.3193	6.26168	6.85714	3.76448	4.54545	4.62578	3.32356	2.78884	4.09298	4.17303	4.71102	5.68975	6.61232	4.46271	3.81443	3.61126
	20.6667	6.07561	6.42534	6.03996	7.19323	7.06571	7.44585	7.47577	7.17149	7.34513	8.10225	7.32514	7.77632	7.22646	6.65217	6.48873	6.04782	7.5603	7.60234	6.69078	7.41445	6.73599	7.56341	7.17923	5.67875	8.12362	9.99035	6.85688	7.74874	6.00098	5.86843	5.24836	6.49414	5.77478	6.70703	7.81491	8.93805	5.2907	5.90631	6.18661
	24	7.23684	7.47411	6.85969	8.6151	8.79318	8.46085	9.32127	8.81567	9.92812	9.39801	9.27688	9.99554	9.33735	7.12734	7.76654	7.35502	9.12392	9.29817	8.58813	9.36757	7.21604	8.35969	7.71235	6.19658	9.79053	10.7543	8.14542	8.80734	7.31827	7.40909	6.21387	7.80417	6.80831	7.4021	9.51646	10.3479	6.27962	7.23318	6.2753
	26.85	8.19746	8.39835	7.89832	9.62072	9.25673	9.98632	10.7453	10.0803	10.1028	11.0072	10.4254	10.2022	9.59921	8.36928	8.11182	9.23657	10.9041	10.1796	9.43313	9.37351	9.27652	9.67161	9.24025	8.24853	10.5169	11.1759	9.13349	11.3379	8.67195	8.46586	7.04698	8.86199	7.32883	9.57746	11.1852	10.9282	6.77458	7.61035	6.45995
	30.2333	9.47463	10.4784	9.64674	11.629	11.245	12.0224	12.4195	11.6258	11.8949	11.6753	11.4809	12.0449	10.0199	10.3946	9.05764	10.0561	12.1907	11.5171	10.727	11.0685	9.60526	11.7201	9.80493	8.38227	10.9722	12.2439	10.6964	11.9279	9.83688	9.3692	8.66443	10.8314	8.95238	10.9368	13.0523	12.5926	7.64099	8.38323	7.27179
	34.2	9.92063	11.1757	10.8554	12.6458	11.6531	12.8871	14.1678	13.1313	13.0051	13.3687	12.8891	13.79	10.1015	11.3617	11.2556	12.6761	13.3206	13.4376	12.3847	13.1271	10.9787	12.5442	11.5365	9.88836	13.1793	13.4917	12.411	14.1995	11.8079	12.061	9.95812	11.6059	9.8818	11.866	14.3911	13.5021	8.34891	8.85886	8.55533
	38.2	11.5724	12.617	12.2227	13.8371	12.5169	14.8618	15.5331	15.2275	14.4634	15.4985	14.6056	14.6042	11.7844	12.326	12.2737	14.3121	14.9098	15.0572	13.0247	13.988	11.6418	13.3744	12.2222	11.0939	13.8303	14.9904	14.6765	15.4059	13.1284	13.9954	10.7741	13.8504	10.6685	13.6701	16.2246	15.2225	8.90966	10.5498	9.00763
	44.6667	11.8563	13.5659	13.4944	15.6703	14.3549	15.5878	16.5699	16.767	16.5605	17.7342	16.934	16.5092	11.5314	12.9324	13.3361	16.6065	16.7136	16.5018	14.2184	15.388	13.2184	15.1629	12.7459	12.4247	14.5982	16.3636	15.5209	17.6549	14.7479	16.232	12.7019	14.6713	12.7005	15.6222	18.3843	17.5398	10.473	10.4157	10.0295
	48	11.9715	13.7584	15.1305	15.2504	16.1039	16.5877	17.7267	17.4152	17.359	18.3611	17.8353	18.1424	12.1377	13.834	13.2328	17.4304	16.3178	17.1676	14.8086	15.1582	13.5593	16.0781	13.7863	12.692	15.4847	17.0465	16.6667	18.5201	16.1468	17.591	13.3248	15.0895	12.5055	16.674	19.0378	18.232	11.0564	10.7736	10.5587
	50.85	12.4635	14.3637	15.6493	16.1333	15.5135	17.068	18.8942	17.9283	17.0795	19.2787	18.013	17.696	12.2038	14.5538	13.0632	17.1142	17.2731	17.8651	15.1945	15.7371	13.658	15.466	13.7797	13.5027	16.9156	16.6437	17.562	17.5507	15.9091	17.45	13.7148	14.5851	12.7867	16.5267	20.345	19.1698	11.2798	10.4876	10.9962
	54.2333	12.552	14.2278	16.4936	15.9241	15.8791	17.8246	19.299	19.1787	17.3019	20.1436	18.7755	18.2646	12.8472	14.2697	14.0902	18.9381	17.0522	18.0233	16.1201	16.2888	14.4	15.9838	13.842	13.9453	15.9949	18.9076	17.5753	19.8251	16.6518	18.4801	14.5799	15.1088	12.8571	16.513	20.5038	20.5011	11.6822	11.0963	10.3116
	58.2	13.3225	14.891	16.9014	15.9914	16.9325	17.6589	19.3895	18.7986	18.8115	19.9577	17.7719	19.1021	13.1195	14.327	13.624	19.0602	16.9058	19.1209	15.9938	17.1171	15.6004	16.1278	14.152	13.5193	16.5331	18.8425	18.5141	20.6798	17.2759	19.1261	14.2626	15.5963	14.1418	18.4702	21.1519	21.7065	11.671	11.1207	11.6423
	62.2	13.0383	15.9461	17.7602	15.8134	17.1588	18.0863	19.4724	20.3664	18.7917	20.1962	18.7031	20	12.2669	14.5378	14.1288	20.2836	17.2109	18.7636	16.5742	17.4497	15.2111	16.4409	14.3838	14.5687	16.4179	17.7003	18.4585	20.8689	18.1274	19.8297	14.6313	15.1154	14.8712	19.1334	22.4773	21.7714	11.5768	10.641	11.291
	68.6667	13.5409	15.4134	18.329	16.9909	17.5534	17.9087	20.3467	20.2195	19.4535	20.9116	19.2704	20.0873	12.8275	14.5051	13.8506	20.6336	18.3196	19.5605	17.1459	17.1461	14.4741	17.6854	14.0609	15.7352	16.1124	17.4379	18.7403	21.0505	19.0655	20.366	14.7225	16.0075	15.9159	19.5329	22.3231	22.1039	11.2676	11.8394	11.7747

## Sheet: Assay6
TOP
Elapsed (hr)	p38i 0.1uM			p38i 1uM			JNKi 0.1uM			JNKi 1uM			MEKi 1nM			MLKi 50nM			p38i 0.1uM + JNKi 0.1uM			p38i 1uM + JNKi 1uM			MEKi + MLKi			MEKi + MLKi + p38i 0.1uM			MEKi + MLKi + p38i 1uM			MEKi + MLKi + JNKi 0.1uM			MEKi + MLKi + JNKi 1uM			EGF control			no EGF control
0	1705	1611	1680	1774	1774	1851	1666	1768	1745	1473	1673	1630	1798	1807	1693	1656	1971	1970	1783	1816	1897	1700	1644	1897	1739	1769	1644	1687	1830	1873	1797	1757	1721	1552	1670	1598	1613	1657	1594	1634	1637	1360	1545	1459	1618
3.38333	1701	1603	1714	1781	1854	1920	1753	1805	1707	1487	1734	1596	1832	1859	1794	1773	2016	2071	1822	1834	2005	1673	1649	1919	1738	1817	1620	1614	1856	1926	1855	1744	1826	1589	1718	1553	1669	1682	1672	1701	1652	1362	1571	1426	1658
7.35	1726	1591	1763	1772	1935	1978	1804	1828	1761	1487	1778	1571	1882	1914	1872	1833	2071	2092	1879	1916	2077	1733	1596	1996	1746	1898	1654	1628	1925	1990	1927	1807	1845	1621	1761	1644	1710	1790	1686	1748	1703	1371	1607	1471	1745
11.35	1737	1575	1813	1998	1880	1989	1831	1801	1753	1462	1805	1567	1927	1944	1929	1863	2071	2138	1894	1959	2097	1730	1592	1990	1783	1926	1675	1564	1929	2062	1948	1751	1871	1624	1829	1642	1737	1811	1713	1820	1681	1367	1628	1498	1746
17.8167	1719	1534	1810	1993	1899	1950	1840	1748	1685	1425	1794	1519	1875	2019	1962	1940	2090	2104	1870	1980	2121	1703	1532	2036	1768	2043	1699	1560	2033	2113	1975	1748	1831	1640	1846	1664	1775	1773	1751	1794	1650	1346	1627	1539	1805
21.15	1717	1355	1881	1947	1880	1978	1797	1764	1691	1392	1789	1494	1906	2041	1971	1931	2088	2135	1873	1958	2092	1847	1511	2030	1785	1975	1714	1577	2012	2094	1998	1798	1806	1640	1872	1724	1802	1783	1809	1751	1623	1333	1590	1516	1763
24	1727	1369	1859	1920	1886	1909	1792	1710	1648	1401	1766	1467	1849	2033	1990	1948	2040	2108	1859	1980	2070	1806	1498	2047	1778	1989	1759	1569	2021	2140	1992	1803	1781	1640	1855	1681	1751	1789	1821	1733	1595	1322	1584	1562	1778
27.3833	1737	1329	1842	1887	1863	1889	1767	1691	1671	1379	1763	1455	1875	2100	1980	1960	1976	2103	1840	1973	2072	1795	1489	2047	1788	2024	1757	1536	2044	2114	2013	1838	1778	1661	1808	1722	1768	1790	1828	1676	1546	1308	1606	1569	1720
31.35	1872	1362	1847	1887	1854	1840	1739	1668	1645	1373	1773	1707	1888	2127	2005	1983	2026	2186	1875	1992	2079	1859	1506	2064	1843	2095	1810	1567	2124	2132	2034	1928	1820	1664	1846	1755	1791	1790	1872	1640	1528	1266	1615	1571	1703
35.35	1893	1543	1911	1865	1911	1838	1775	1696	1628	1401	1819	1669	1935	2167	2071	2003	2040	2185	1871	2051	2090	1896	1527	2078	2046	2107	1881	1588	2197	2221	2147	1982	1849	1738	1832	1790	1842	1867	1987	1658	1536	1273	1681	1614	1754
41.8167	2004	1844	2006	1918	1973	1873	1777	1894	1937	1826	1828	1926	1979	2306	2188	2085	2072	2260	1923	2067	2185	2208	2110	2152	2376	2240	1738	1899	2330	2360	2243	2401	1924	2008	1957	2058	1959	1984	2048	1665	1729	1285	1742	1842	1807
45.15	2024	1854	1999	1920	2001	1857	1770	1885	1952	1886	1856	1934	1998	2370	2161	2111	2084	2269	1931	2067	2195	2259	2148	2169	2450	2218	1930	1918	2324	2361	2282	2434	1960	2069	1966	2006	1970	2057	2095	1688	1703	1290	1785	1855	1837
48	2046	1875	2039	1911	1991	1855	1779	1898	1969	1889	1851	1902	1972	2401	2197	2163	2096	2328	1921	2145	2182	2273	2121	2198	2480	2264	1781	1953	2349	2402	2368	2457	1963	2119	1991	2041	2001	2104	2102	1678	1682	1297	1832	1903	1892
51.3833	2059	1881	2049	1919	1966	1849	1793	1892	1974	1898	1844	1925	1995	2413	2237	2186	2126	2315	1939	2146	2197	2307	2152	2205	2558	2336	1983	1969	2419	2430	2446	2517	1993	2129	2017	2075	2022	2125	2160	1677	1684	1288	1863	1881	1894
55.35	2053	1899	2082	1902	1975	1909	1791	1935	1953	1928	1853	1913	2004	2462	2253	2232	2124	2295	1969	2153	2220	2302	2196	2222	2564	2376	2016	2040	2455	2489	2498	2596	2080	2204	2015	2087	2104	2137	2227	1673	1706	1278	1865	1922	1924
59.35	2057	1934	2127	1945	1976	1914	1771	1897	1924	1945	1873	1939	2014	2489	2283	2267	2122	2348	2001	2133	2206	2272	2206	2256	2663	2380	1903	2107	2530	2549	2562	2685	2085	2168	2064	2175	2111	2200	2234	1676	1675	1308	1935	1978	1991
65.8167	2084	1967	2165	1967	1930	1902	1762	1945	1955	1970	1864	1928	2014	2584	2343	2338	2138	2395	2010	2133	2248	2317	2219	2205	2658	2446	2020	2157	2652	2667	2624	2826	2185	2240	2127	2238	2256	2295	2273	1675	1671	1320	1973	2037	2028
69.15	2086	1960	2162	1891	1939	1874	1778	1939	1970	1938	1857	1928	1980	2589	2371	2372	2114	2406	2009	2152	2219	2332	2193	2217	2687	2471	2013	2201	2634	2645	2612	2855	2184	2284	2156	2246	2256	2315	2338	1651	1685	1312	2005	2056	2094
72	2146	1986	2199	1852	1894	1821	1770	1877	1971	1963	1848	1959	2000	2587	2360	2383	2143	2407	2000	2151	2252	2338	2168	2181	2696	2480	2008	2211	2677	2689	2634	2917	2263	2297	2177	2266	2296	2386	2374	1641	1640	1310	2030	2098	2078
BOTTOM
Elapsed (hr)	p38i 0.1uM			p38i 1uM			JNKi 0.1uM			JNKi 1uM			MEKi 1nM			MLKi 50nM			p38i 0.1uM + JNKi 0.1uM			p38i 1uM + JNKi 1uM			MEKi + MLKi			MEKi + MLKi + p38i 0.1uM			MEKi + MLKi + p38i 1uM			MEKi + MLKi + JNKi 0.1uM			MEKi + MLKi + JNKi 1uM			EGF control			no EGF control
0	15	26	21	32	27	31	26	30	28	12	31	35	20	23	19	22	19	27	33	31	28	19	32	30	22	15	28	24	37	41	28	26	56	26	44	56	20	30	34	37	61	38	32	32	35
3.38333	14	29	35	36	33	44	35	33	23	26	28	45	37	32	37	37	32	48	34	47	51	22	20	51	28	28	26	20	43	50	50	56	57	19	54	50	30	37	42	51	59	48	39	39	40
7.35	20	45	40	63	48	70	51	52	25	31	40	55	43	36	54	33	57	59	56	67	73	24	37	45	31	38	38	40	47	72	59	57	78	39	72	60	43	53	60	71	84	45	42	46	46
11.35	35	36	39	75	65	95	82	66	45	37	52	78	74	62	61	64	90	60	65	88	82	33	42	73	46	45	37	53	54	92	66	71	116	49	79	81	53	61	71	79	100	61	48	46	48
17.8167	45	74	66	114	85	172	105	105	50	57	61	101	85	76	91	85	133	91	85	148	136	44	57	101	40	68	51	65	59	135	112	99	167	80	114	125	82	90	89	124	151	88	55	56	63
21.15	66	74	66	149	113	203	136	124	65	58	66	130	97	106	99	112	160	108	124	162	163	63	63	124	51	101	64	73	81	147	129	119	170	90	137	125	95	105	96	150	186	108	68	58	80
24	73	110	80	201	146	231	159	158	85	66	82	143	122	124	132	119	191	134	115	211	169	58	68	127	47	105	71	86	89	170	138	145	189	100	151	149	100	109	111	174	193	112	78	69	81
27.3833	89	114	96	213	164	259	204	172	91	79	99	175	142	140	154	155	238	161	141	228	200	77	76	150	58	115	90	94	101	186	151	157	225	95	161	166	123	128	136	191	223	131	90	76	102
31.35	104	135	116	262	177	284	227	175	117	77	121	239	155	153	186	182	250	185	171	263	239	92	105	197	75	136	98	116	110	200	183	174	242	115	185	181	135	152	136	228	267	159	90	82	128
35.35	126	189	140	292	190	317	261	195	127	99	144	258	181	181	198	228	289	211	183	301	278	103	117	214	89	152	106	127	137	230	191	207	242	118	208	196	158	156	144	234	286	178	101	97	149
41.8167	144	268	168	346	241	361	317	256	193	136	175	333	231	221	243	269	330	231	231	346	322	133	178	247	114	173	127	178	183	298	231	269	279	127	248	259	176	191	162	304	347	207	134	117	178
45.15	149	268	190	360	244	365	315	280	220	140	182	334	244	232	269	332	368	281	256	371	350	150	187	244	135	193	168	207	197	290	260	284	275	140	245	255	204	200	201	310	360	227	129	122	191
48	152	293	213	363	256	350	324	303	225	140	190	366	241	267	293	344	356	330	288	398	374	159	195	261	145	219	153	198	222	313	263	307	313	153	267	275	209	216	198	335	388	223	139	134	203
51.3833	165	305	225	385	292	399	346	300	239	162	206	381	264	271	317	342	382	338	328	416	394	170	204	287	143	253	186	210	225	343	258	337	297	167	286	284	208	236	205	347	376	234	173	164	221
55.35	194	325	233	414	291	404	365	328	263	171	220	387	291	313	358	403	388	384	338	457	412	182	212	309	173	271	217	232	262	349	286	370	325	179	311	296	265	265	236	379	420	270	181	166	254
59.35	199	340	254	436	363	431	376	332	257	175	231	412	311	306	382	440	426	376	377	472	442	188	231	310	178	243	212	242	272	379	302	393	328	180	318	336	290	302	245	401	449	262	182	181	261
65.8167	243	397	287	475	372	426	415	396	274	191	254	477	322	351	405	456	435	439	409	544	492	224	231	314	211	274	244	251	335	394	311	416	331	210	364	385	316	317	275	428	478	307	208	198	267
69.15	254	422	307	497	381	420	428	403	280	195	257	480	322	362	404	452	457	423	454	545	529	222	233	318	213	276	233	274	321	419	322	442	351	223	381	394	322	318	292	437	510	328	211	223	280
72	258	421	296	479	409	422	419	379	292	218	261	467	320	370	420	507	463	422	440	562	507	254	262	322	210	279	247	276	349	404	326	479	346	236	366	404	310	318	291	440	501	301	227	226	280
TOP+BOTTOM
Elapsed (hr)	p38i 0.1uM			p38i 1uM			JNKi 0.1uM			JNKi 1uM			MEKi 1nM			MLKi 50nM			p38i 0.1uM + JNKi 0.1uM			p38i 1uM + JNKi 1uM			MEKi + MLKi			MEKi + MLKi + p38i 0.1uM			MEKi + MLKi + p38i 1uM			MEKi + MLKi + JNKi 0.1uM			MEKi + MLKi + JNKi 1uM			EGF control			no EGF control
0	1720	1637	1701	1806	1801	1882	1692	1798	1773	1485	1704	1665	1818	1830	1712	1678	1990	1997	1816	1847	1925	1719	1676	1927	1761	1784	1672	1711	1867	1914	1825	1783	1777	1578	1714	1654	1633	1687	1628	1671	1698	1398	1577	1491	1653
3.38333	1715	1632	1749	1817	1887	1964	1788	1838	1730	1513	1762	1641	1869	1891	1831	1810	2048	2119	1856	1881	2056	1695	1669	1970	1766	1845	1646	1634	1899	1976	1905	1800	1883	1608	1772	1603	1699	1719	1714	1752	1711	1410	1610	1465	1698
7.35	1746	1636	1803	1835	1983	2048	1855	1880	1786	1518	1818	1626	1925	1950	1926	1866	2128	2151	1935	1983	2150	1757	1633	2041	1777	1936	1692	1668	1972	2062	1986	1864	1923	1660	1833	1704	1753	1843	1746	1819	1787	1416	1649	1517	1791
11.35	1772	1611	1852	2073	1945	2084	1913	1867	1798	1499	1857	1645	2001	2006	1990	1927	2161	2198	1959	2047	2179	1763	1634	2063	1829	1971	1712	1617	1983	2154	2014	1822	1987	1673	1908	1723	1790	1872	1784	1899	1781	1428	1676	1544	1794
17.8167	1764	1608	1876	2107	1984	2122	1945	1853	1735	1482	1855	1620	1960	2095	2053	2025	2223	2195	1955	2128	2257	1747	1589	2137	1808	2111	1750	1625	2092	2248	2087	1847	1998	1720	1960	1789	1857	1863	1840	1918	1801	1434	1682	1595	1868
21.15	1783	1429	1947	2096	1993	2181	1933	1888	1756	1450	1855	1624	2003	2147	2070	2043	2248	2243	1997	2120	2255	1910	1574	2154	1836	2076	1778	1650	2093	2241	2127	1917	1976	1730	2009	1849	1897	1888	1905	1901	1809	1441	1658	1574	1843
24	1800	1479	1939	2121	2032	2140	1951	1868	1733	1467	1848	1610	1971	2157	2122	2067	2231	2242	1974	2191	2239	1864	1566	2174	1825	2094	1830	1655	2110	2310	2130	1948	1970	1740	2006	1830	1851	1898	1932	1907	1788	1434	1662	1631	1859
27.3833	1826	1443	1938	2100	2027	2148	1971	1863	1762	1458	1862	1630	2017	2240	2134	2115	2214	2264	1981	2201	2272	1872	1565	2197	1846	2139	1847	1630	2145	2300	2164	1995	2003	1756	1969	1888	1891	1918	1964	1867	1769	1439	1696	1645	1822
31.35	1976	1497	1963	2149	2031	2124	1966	1843	1762	1450	1894	1946	2043	2280	2191	2165	2276	2371	2046	2255	2318	1951	1611	2261	1918	2231	1908	1683	2234	2332	2217	2102	2062	1779	2031	1936	1926	1942	2008	1868	1795	1425	1705	1653	1831
35.35	2019	1732	2051	2157	2101	2155	2036	1891	1755	1500	1963	1927	2116	2348	2269	2231	2329	2396	2054	2352	2368	1999	1644	2292	2135	2259	1987	1715	2334	2451	2338	2189	2091	1856	2040	1986	2000	2023	2131	1892	1822	1451	1782	1711	1903
41.8167	2148	2112	2174	2264	2214	2234	2094	2150	2130	1962	2003	2259	2210	2527	2431	2354	2402	2491	2154	2413	2507	2341	2288	2399	2490	2413	1865	2077	2513	2658	2474	2670	2203	2135	2205	2317	2135	2175	2210	1969	2076	1492	1876	1959	1985
45.15	2173	2122	2189	2280	2245	2222	2085	2165	2172	2026	2038	2268	2242	2602	2430	2443	2452	2550	2187	2438	2545	2409	2335	2413	2585	2411	2098	2125	2521	2651	2542	2718	2235	2209	2211	2261	2174	2257	2296	1998	2063	1517	1914	1977	2028
48	2198	2168	2252	2274	2247	2205	2103	2201	2194	2029	2041	2268	2213	2668	2490	2507	2452	2658	2209	2543	2556	2432	2316	2459	2625	2483	1934	2151	2571	2715	2631	2764	2276	2272	2258	2316	2210	2320	2300	2013	2070	1520	1971	2037	2095
51.3833	2224	2186	2274	2304	2258	2248	2139	2192	2213	2060	2050	2306	2259	2684	2554	2528	2508	2653	2267	2562	2591	2477	2356	2492	2701	2589	2169	2179	2644	2773	2704	2854	2290	2296	2303	2359	2230	2361	2365	2024	2060	1522	2036	2045	2115
55.35	2247	2224	2315	2316	2266	2313	2156	2263	2216	2099	2073	2300	2295	2775	2611	2635	2512	2679	2307	2610	2632	2484	2408	2531	2737	2647	2233	2272	2717	2838	2784	2966	2405	2383	2326	2383	2369	2402	2463	2052	2126	1548	2046	2088	2178
59.35	2256	2274	2381	2381	2339	2345	2147	2229	2181	2120	2104	2351	2325	2795	2665	2707	2548	2724	2378	2605	2648	2460	2437	2566	2841	2623	2115	2349	2802	2928	2864	3078	2413	2348	2382	2511	2401	2502	2479	2077	2124	1570	2117	2159	2252
65.8167	2327	2364	2452	2442	2302	2328	2177	2341	2229	2161	2118	2405	2336	2935	2748	2794	2573	2834	2419	2677	2740	2541	2450	2519	2869	2720	2264	2408	2987	3061	2935	3242	2516	2450	2491	2623	2572	2612	2548	2103	2149	1627	2181	2235	2295
69.15	2340	2382	2469	2388	2320	2294	2206	2342	2250	2133	2114	2408	2302	2951	2775	2824	2571	2829	2463	2697	2748	2554	2426	2535	2900	2747	2246	2475	2955	3064	2934	3297	2535	2507	2537	2640	2578	2633	2630	2088	2195	1640	2216	2279	2374
72	2404	2407	2495	2331	2303	2243	2189	2256	2263	2181	2109	2426	2320	2957	2780	2890	2606	2829	2440	2713	2759	2592	2430	2503	2906	2759	2255	2487	3026	3093	2960	3396	2609	2533	2543	2670	2606	2704	2665	2081	2141	1611	2257	2324	2358
% INVADED
Elapsed (hr)	p38i 0.1uM			p38i 1uM			JNKi 0.1uM			JNKi 1uM			MEKi 1nM			MLKi 50nM			p38i 0.1uM + JNKi 0.1uM			p38i 1uM + JNKi 1uM			MEKi + MLKi			MEKi + MLKi + p38i 0.1uM			MEKi + MLKi + p38i 1uM			MEKi + MLKi + JNKi 0.1uM			MEKi + MLKi + JNKi 1uM			EGF control			no EGF control
0	0.872093	1.58827	1.23457	1.77187	1.49917	1.64718	1.53664	1.66852	1.57924	0.808081	1.81925	2.1021	1.10011	1.25683	1.10981	1.31108	0.954774	1.35203	1.81718	1.6784	1.45455	1.10529	1.90931	1.55682	1.24929	0.840807	1.67464	1.40269	1.98179	2.14211	1.53425	1.45822	3.15138	1.64766	2.56709	3.38573	1.22474	1.7783	2.08845	2.21424	3.59246	2.71817	2.02917	2.14621	2.11736
3.38333	0.816327	1.77696	2.00114	1.98129	1.74881	2.24033	1.95749	1.79543	1.32948	1.71844	1.5891	2.74223	1.97967	1.69223	2.02075	2.0442	1.5625	2.26522	1.8319	2.49867	2.48054	1.29794	1.19832	2.58883	1.5855	1.51762	1.57959	1.22399	2.26435	2.53036	2.62467	3.11111	3.02708	1.18159	3.0474	3.11915	1.76574	2.15241	2.45041	2.91096	3.44828	3.40426	2.42236	2.66212	2.35571
7.35	1.14548	2.75061	2.21852	3.43324	2.42057	3.41797	2.74933	2.76596	1.39978	2.04216	2.20022	3.38253	2.23377	1.84615	2.80374	1.76849	2.67857	2.74291	2.89406	3.37872	3.39535	1.36596	2.26577	2.2048	1.74451	1.96281	2.24586	2.39808	2.38337	3.49176	2.9708	3.05794	4.05616	2.3494	3.92799	3.52113	2.45294	2.87575	3.43643	3.90324	4.70062	3.17797	2.547	3.0323	2.5684
11.35	1.97517	2.23464	2.10583	3.61795	3.3419	4.55854	4.28646	3.53508	2.50278	2.46831	2.80022	4.74164	3.69815	3.09073	3.06533	3.32122	4.16474	2.72975	3.31802	4.29897	3.76319	1.87181	2.57038	3.53854	2.51504	2.28311	2.16121	3.27767	2.72315	4.27112	3.27706	3.89682	5.83795	2.92887	4.14046	4.7011	2.96089	3.25855	3.97982	4.16008	5.61482	4.27171	2.86396	2.97927	2.67559
17.8167	2.55102	4.60199	3.51812	5.41054	4.28427	8.10556	5.39846	5.66649	2.88184	3.84615	3.28841	6.23457	4.33673	3.62768	4.43254	4.19753	5.98291	4.14579	4.34783	6.95489	6.0257	2.5186	3.58716	4.72625	2.21239	3.22122	2.91429	4	2.82027	6.00534	5.36655	5.36004	8.35836	4.65116	5.81633	6.98714	4.41572	4.83092	4.83696	6.46507	8.38423	6.13668	3.26992	3.51097	3.37259
21.15	3.70163	5.17845	3.38983	7.10878	5.66984	9.30766	7.0357	6.5678	3.70159	4	3.55795	8.00493	4.84274	4.93712	4.78261	5.48213	7.11744	4.81498	6.20931	7.64151	7.22838	3.29843	4.00254	5.75673	2.77778	4.86513	3.59955	4.42424	3.87004	6.55957	6.06488	6.20762	8.60324	5.20231	6.81931	6.76041	5.00791	5.56144	5.03937	7.89058	10.2819	7.4948	4.10133	3.68488	4.34075
24	4.05556	7.43746	4.12584	9.47666	7.18504	10.7944	8.14967	8.45824	4.90479	4.49898	4.43723	8.88199	6.18975	5.74873	6.22055	5.75714	8.56118	5.97681	5.82573	9.63031	7.54801	3.11159	4.34227	5.84177	2.57534	5.01433	3.87978	5.19637	4.21801	7.35931	6.47887	7.44353	9.59391	5.74713	7.52742	8.14208	5.40249	5.74289	5.74534	9.12428	10.7942	7.81032	4.69314	4.23053	4.35718
27.3833	4.87404	7.90021	4.95356	10.1429	8.09077	12.0577	10.3501	9.23242	5.16459	5.41838	5.31686	10.7362	7.04016	6.25	7.21649	7.32861	10.7498	7.11131	7.11762	10.3589	8.80282	4.11325	4.85623	6.82749	3.14193	5.37634	4.87277	5.76687	4.70862	8.08696	6.97782	7.86967	11.2332	5.41002	8.17674	8.79237	6.50449	6.67362	6.92464	10.2303	12.606	9.10354	5.3066	4.62006	5.59824
31.35	5.26316	9.01804	5.90932	12.1917	8.71492	13.371	11.5463	9.49539	6.64018	5.31034	6.3886	12.2816	7.58688	6.71053	8.48927	8.40647	10.9842	7.80261	8.35777	11.663	10.3106	4.71553	6.51769	8.71296	3.91032	6.09592	5.13627	6.89245	4.9239	8.57633	8.2544	8.27783	11.7362	6.46431	9.10881	9.34917	7.00935	7.82698	6.77291	12.2056	14.8747	11.1579	5.27859	4.96068	6.99072
35.35	6.24071	10.9122	6.82594	13.5373	9.04331	14.71	12.8193	10.312	7.23647	6.6	7.33571	13.3887	8.55388	7.70869	8.72631	10.2196	12.4088	8.80634	8.90944	12.7976	11.7399	5.15258	7.11679	9.33682	4.16862	6.72864	5.33468	7.40525	5.86975	9.38392	8.16938	9.45637	11.5734	6.35776	10.1961	9.86908	7.9	7.71132	6.75739	12.3679	15.697	12.2674	5.66779	5.6692	7.82974
41.8167	6.70391	12.6894	7.72769	15.2827	10.8853	16.1594	15.1385	11.907	9.06103	6.9317	8.73689	14.741	10.4525	8.74555	9.99589	11.4274	13.7386	9.27338	10.7242	14.339	12.844	5.68133	7.77972	10.296	4.57831	7.1695	6.80965	8.57005	7.28213	11.2114	9.33711	10.0749	12.6645	5.94848	11.2472	11.1782	8.24356	8.78161	7.33032	15.4393	16.7148	13.874	7.14286	5.97243	8.96725
45.15	6.85688	12.6296	8.67976	15.7895	10.8686	16.4266	15.1079	12.933	10.1289	6.91017	8.93032	14.7266	10.8831	8.91622	11.07	13.5898	15.0082	11.0196	11.7055	15.2174	13.7525	6.22665	8.00857	10.1119	5.22244	8.00498	8.00763	9.74118	7.81436	10.9393	10.2282	10.4489	12.3043	6.33771	11.081	11.2782	9.38362	8.86132	8.75436	15.5155	17.4503	14.9637	6.73981	6.17097	9.41815
48	6.91538	13.5148	9.45826	15.9631	11.393	15.873	15.4066	13.7665	10.2552	6.89995	9.30916	16.1376	10.8902	10.0075	11.7671	13.7216	14.5188	12.4153	13.0376	15.6508	14.6322	6.53783	8.41969	10.6141	5.52381	8.81998	7.91107	9.20502	8.63477	11.5285	9.9962	11.1071	13.7522	6.73415	11.8246	11.8739	9.45701	9.31034	8.6087	16.6418	18.744	14.6711	7.05226	6.5783	9.68974
51.3833	7.41906	13.9524	9.89446	16.7101	12.9318	17.7491	16.1758	13.6861	10.7998	7.86408	10.0488	16.5221	11.6866	10.0969	12.4119	13.5285	15.2313	12.7403	14.4685	16.2373	15.2065	6.86314	8.65874	11.5169	5.29434	9.77211	8.57538	9.63745	8.50983	12.3693	9.54142	11.808	12.9694	7.27352	12.4186	12.039	9.32735	9.99576	8.66808	17.1443	18.2524	15.3745	8.49705	8.01956	10.4492
55.35	8.63373	14.6133	10.0648	17.8756	12.842	17.4665	16.9295	14.494	11.8682	8.14674	10.6126	16.8261	12.6797	11.2793	13.7112	15.2941	15.4459	14.3337	14.6511	17.5096	15.6535	7.32689	8.80399	12.2086	6.32079	10.238	9.71787	10.2113	9.64299	12.2974	10.273	12.4747	13.5135	7.51154	13.3706	12.4213	11.1862	11.0325	9.58181	18.4698	19.7554	17.4419	8.84653	7.95019	11.6621
59.35	8.82092	14.9516	10.6678	18.3116	15.5195	18.3795	17.5128	14.8946	11.7836	8.25472	10.9791	17.5245	13.3763	10.9481	14.334	16.2542	16.719	13.8032	15.8537	18.119	16.6918	7.64228	9.47887	12.0811	6.2654	9.2642	10.0236	10.3023	9.70735	12.944	10.5447	12.768	13.593	7.6661	13.3501	13.3811	12.0783	12.0703	9.88302	19.3067	21.1394	16.6879	8.59707	8.38351	11.5897
65.8167	10.4426	16.7936	11.7047	19.4513	16.1599	18.299	19.0629	16.9158	12.2925	8.8385	11.9924	19.8337	13.7842	11.9591	14.738	16.3207	16.9063	15.4905	16.9078	20.3213	17.9562	8.81543	9.42857	12.4653	7.35448	10.0735	10.7774	10.4236	11.2153	12.8716	10.5963	12.8316	13.1558	8.57143	14.6126	14.6778	12.2862	12.1363	10.7928	20.3519	22.2429	18.8691	9.53691	8.85906	11.634
69.15	10.8547	17.7162	12.4342	20.8124	16.4224	18.3086	19.4016	17.2075	12.4444	9.14205	12.157	19.9336	13.9878	12.267	14.5586	16.0057	17.7752	14.9523	18.4328	20.2076	19.2504	8.69225	9.60429	12.5444	7.34483	10.0473	10.374	11.0707	10.8629	13.6749	10.9748	13.4061	13.8462	8.89509	15.0177	14.9242	12.4903	12.0775	11.1027	20.9291	23.2346	20	9.52166	9.78499	11.7944
72	10.7321	17.4907	11.8637	20.5491	17.7594	18.8141	19.1412	16.7996	12.9032	9.99541	12.3755	19.2498	13.7931	12.5127	15.1079	17.5433	17.7667	14.9169	18.0328	20.7151	18.3762	9.79938	10.7819	12.8646	7.22643	10.1124	10.9534	11.0977	11.5334	13.0618	11.0135	14.1048	13.2618	9.31702	14.3924	15.1311	11.8956	11.7604	10.9193	21.1437	23.4003	18.684	10.0576	9.72461	11.8745

## Sheet: Assay7
TOP
Elapsed (hr)	p38i 1uM			JNKi 1uM			MEKi 1nM			MLKi 50nM			p38i + JNKi			MEKi + MLKi			p38i + JNKi + MEKi + MLKi			EGF control			no EGF control
0	1520	1549	1563	1630	1401	1500	1574	1565	1574	1559	1569	1503	1492	1579	1613	1671	1702	1658	1546	1629	1471	1477	1442	1481	1427	1439	1391
2.85	1612	1600	1659	1661	1410	1531	1665	1623	1647	1549	1604	1569	1553	1631	1633	1725	1738	1777	1585	1649	1531	1515	1466	1527	1437	1430	1275
6.23333	1679	1656	1695	1758	1437	1569	1742	1674	1713	1607	1662	1619	1616	1690	1731	1811	1785	1862	1697	1724	1584	1572	1496	1570	1505	1482	1324
10.2	1750	1758	1773	1829	1493	1665	1811	1760	1802	1685	1742	1701	1688	1790	1840	1905	1894	1964	1773	1859	1667	1648	1582	1632	1542	1653	1489
14.2	1803	1849	1817	1879	1555	1750	1900	1814	1845	1758	1814	1761	1744	1837	1892	1992	1952	2060	1879	1981	1718	1688	1617	1700	1670	1699	1533
20.6667	1861	1918	1898	1945	1672	1771	1919	1877	1953	1840	1899	1820	1781	1935	1916	2093	2092	2201	1959	2095	1750	1691	1701	1733	1775	1760	1610
24	1848	1949	1914	1984	1678	1811	1991	1894	2007	1908	1887	1838	1816	1935	1964	2088	2122	2195	1984	2125	1793	1708	1755	1751	1809	1817	1596
26.85	1865	1948	1941	2011	1722	1784	1985	1890	1997	1927	1918	1858	1846	1975	1988	2120	2123	2262	2034	2116	1835	1726	1718	1761	1782	1822	1617
30.2333	1873	1974	1917	2003	1703	1800	1996	1910	2005	1897	1906	1816	1859	1973	2029	2117	2158	2287	2056	2152	1830	1678	1715	1737	1773	1809	1630
34.2	1826	1941	1898	2015	1718	1786	2006	1926	1970	1934	1937	1805	1852	2023	2035	2101	2182	2287	2113	2200	1808	1677	1706	1716	1781	1935	1625
38.2	1856	1927	1874	2040	1709	1756	1983	1919	2025	1926	1924	1786	1904	2014	2049	2105	2215	2337	2145	2236	1847	1669	1682	1680	1810	1970	1648
44.6667	1806	1874	1879	2052	1695	1785	1981	1963	2008	1918	1943	1794	1878	2024	2114	2148	2281	2329	2178	2270	1919	1639	1679	1669	1826	2043	1677
48	1823	1921	1848	2089	1708	1799	2019	1969	1979	1963	1948	1788	1889	2015	2114	2196	2280	2362	2220	2346	1927	1655	1656	1652	1914	2097	1695
50.85	1804	1935	1874	2071	1713	1790	2023	1944	1999	1976	1947	1814	1908	2038	2130	2217	2264	2403	2272	2429	1918	1672	1660	1651	1934	2109	1713
54.2333	1779	1920	1885	2060	1717	1778	2044	1935	1987	2039	1955	1812	1921	2072	2179	2182	2341	2400	2258	2475	1987	1661	1709	1638	1974	2172	1752
58.2	1842	1955	1885	2073	1709	1762	2012	1970	1988	2098	1954	1851	1962	2076	2146	2247	2366	2460	2295	2530	1998	1700	1714	1683	1974	2206	1792
62.2	1856	1987	1906	2119	1783	1775	2041	1994	2005	2139	1977	1902	1995	2107	2170	2303	2415	2513	2355	2612	2041	1705	1710	1641	2002	2290	1856
68.6667	1896	1997	1922	2130	1793	1762	2040	2054	2025	2218	2054	1909	1993	2124	2213	2372	2479	2619	2418	2684	2121	1704	1774	1656	2129	2314	2237
72	1935	2010	1951	2127	1815	1759	2039	2067	2047	2271	2127	1986	2025	2145	2237	2390	2487	2644	2463	2760	2128	1667	1765	1696	2150	2348	2242
BOTTOM
Elapsed (hr)	p38i 1uM			JNKi 1uM			MEKi 1nM			MLKi 50nM			p38i + JNKi			MEKi + MLKi			p38i + JNKi + MEKi + MLKi			EGF control			no EGF control
0	90	103	95	69	97	63	70	91	92	99	113	73	90	108	94	77	59	43	81	118	91	64	103	60	86	88	150
2.85	72	71	69	60	49	51	55	85	88	53	60	64	65	55	48	56	41	61	37	53	52	68	79	65	43	59	47
6.23333	99	83	67	85	65	67	97	128	117	72	84	88	73	79	61	88	68	81	51	49	81	90	97	75	54	53	44
10.2	111	111	96	109	100	97	129	184	153	83	111	115	95	99	69	122	83	98	76	59	97	121	121	108	56	59	49
14.2	150	136	144	132	127	133	185	214	204	100	156	162	109	114	122	167	127	133	87	100	115	170	139	124	75	61	37
20.6667	219	185	194	207	161	201	251	289	270	150	192	208	157	160	140	227	199	199	127	141	170	225	194	169	88	86	47
24	227	205	227	221	204	229	286	314	314	157	217	227	190	198	170	272	232	224	143	170	170	261	223	194	104	102	53
26.85	262	239	261	231	228	242	315	349	330	170	242	258	220	204	174	280	271	248	169	176	198	294	245	212	107	110	58
30.2333	278	247	289	267	246	293	358	372	340	207	274	279	244	208	190	318	302	267	197	213	227	315	270	220	125	131	67
34.2	303	259	328	284	269	314	398	397	383	232	299	309	263	254	221	366	319	293	205	229	252	339	299	250	142	155	72
38.2	329	280	351	311	292	343	439	446	392	239	333	328	279	302	234	393	356	341	238	260	268	373	320	280	150	167	85
44.6667	370	346	406	361	341	399	505	475	455	296	394	373	327	335	286	422	401	409	291	296	323	422	371	316	185	191	105
48	380	366	436	410	351	419	508	487	477	328	410	387	315	347	315	461	425	408	301	305	325	451	426	330	191	203	116
50.85	380	379	435	407	344	462	542	497	478	339	444	402	335	387	308	458	436	425	328	304	350	477	435	342	182	200	121
54.2333	414	388	436	434	361	469	560	506	498	348	473	399	337	403	333	505	464	479	334	331	350	496	448	343	198	206	145
58.2	419	416	478	466	391	492	580	526	522	370	488	420	346	446	343	501	488	480	355	360	366	516	475	374	201	222	142
62.2	451	427	498	506	415	502	626	551	525	378	502	417	378	488	362	514	514	498	372	394	371	577	506	369	211	256	145
68.6667	470	462	526	518	436	541	643	571	570	436	542	459	413	523	406	553	564	530	429	430	388	624	543	363	196	293	179
72	470	462	545	531	436	548	676	570	561	442	545	460	423	533	397	596	560	537	442	436	394	629	569	369	212	296	180
TOP + BOTTOM
Elapsed (hr)	p38i 1uM			JNKi 1uM			MEKi 1nM			MLKi 50nM			p38i + JNKi			MEKi + MLKi			p38i + JNKi + MEKi + MLKi			EGF control			no EGF control
0	1610	1652	1658	1699	1498	1563	1644	1656	1666	1658	1682	1576	1582	1687	1707	1748	1761	1701	1627	1747	1562	1541	1545	1541	1513	1527	1541
2.85	1684	1671	1728	1721	1459	1582	1720	1708	1735	1602	1664	1633	1618	1686	1681	1781	1779	1838	1622	1702	1583	1583	1545	1592	1480	1489	1322
6.23333	1778	1739	1762	1843	1502	1636	1839	1802	1830	1679	1746	1707	1689	1769	1792	1899	1853	1943	1748	1773	1665	1662	1593	1645	1559	1535	1368
10.2	1861	1869	1869	1938	1593	1762	1940	1944	1955	1768	1853	1816	1783	1889	1909	2027	1977	2062	1849	1918	1764	1769	1703	1740	1598	1712	1538
14.2	1953	1985	1961	2011	1682	1883	2085	2028	2049	1858	1970	1923	1853	1951	2014	2159	2079	2193	1966	2081	1833	1858	1756	1824	1745	1760	1570
20.6667	2080	2103	2092	2152	1833	1972	2170	2166	2223	1990	2091	2028	1938	2095	2056	2320	2291	2400	2086	2236	1920	1916	1895	1902	1863	1846	1657
24	2075	2154	2141	2205	1882	2040	2277	2208	2321	2065	2104	2065	2006	2133	2134	2360	2354	2419	2127	2295	1963	1969	1978	1945	1913	1919	1649
26.85	2127	2187	2202	2242	1950	2026	2300	2239	2327	2097	2160	2116	2066	2179	2162	2400	2394	2510	2203	2292	2033	2020	1963	1973	1889	1932	1675
30.2333	2151	2221	2206	2270	1949	2093	2354	2282	2345	2104	2180	2095	2103	2181	2219	2435	2460	2554	2253	2365	2057	1993	1985	1957	1898	1940	1697
34.2	2129	2200	2226	2299	1987	2100	2404	2323	2353	2166	2236	2114	2115	2277	2256	2467	2501	2580	2318	2429	2060	2016	2005	1966	1923	2090	1697
38.2	2185	2207	2225	2351	2001	2099	2422	2365	2417	2165	2257	2114	2183	2316	2283	2498	2571	2678	2383	2496	2115	2042	2002	1960	1960	2137	1733
44.6667	2176	2220	2285	2413	2036	2184	2486	2438	2463	2214	2337	2167	2205	2359	2400	2570	2682	2738	2469	2566	2242	2061	2050	1985	2011	2234	1782
48	2203	2287	2284	2499	2059	2218	2527	2456	2456	2291	2358	2175	2204	2362	2429	2657	2705	2770	2521	2651	2252	2106	2082	1982	2105	2300	1811
50.85	2184	2314	2309	2478	2057	2252	2565	2441	2477	2315	2391	2216	2243	2425	2438	2675	2700	2828	2600	2733	2268	2149	2095	1993	2116	2309	1834
54.2333	2193	2308	2321	2494	2078	2247	2604	2441	2485	2387	2428	2211	2258	2475	2512	2687	2805	2879	2592	2806	2337	2157	2157	1981	2172	2378	1897
58.2	2261	2371	2363	2539	2100	2254	2592	2496	2510	2468	2442	2271	2308	2522	2489	2748	2854	2940	2650	2890	2364	2216	2189	2057	2175	2428	1934
62.2	2307	2414	2404	2625	2198	2277	2667	2545	2530	2517	2479	2319	2373	2595	2532	2817	2929	3011	2727	3006	2412	2282	2216	2010	2213	2546	2001
68.6667	2366	2459	2448	2648	2229	2303	2683	2625	2595	2654	2596	2368	2406	2647	2619	2925	3043	3149	2847	3114	2509	2328	2317	2019	2325	2607	2416
72	2405	2472	2496	2658	2251	2307	2715	2637	2608	2713	2672	2446	2448	2678	2634	2986	3047	3181	2905	3196	2522	2296	2334	2065	2362	2644	2422
% INVADED
Elapsed (hr)	p38i 1uM			JNKi 1uM			MEKi 1nM			MLKi 50nM			p38i + JNKi			MEKi + MLKi			p38i + JNKi + MEKi + MLKi			EGF control			no EGF control
0	5.59006	6.23487	5.72979	4.06121	6.4753	4.03071	4.25791	5.49517	5.52221	5.97105	6.71819	4.63198	5.689	6.4019	5.50674	4.40503	3.35037	2.52792	4.97849	6.75444	5.82586	4.15315	6.66667	3.89358	5.68407	5.76293	9.73394
2.85	4.27553	4.24895	3.99306	3.48635	3.35846	3.22377	3.19767	4.97658	5.07205	3.30836	3.60577	3.91917	4.01731	3.26216	2.85544	3.1443	2.30467	3.31882	2.28113	3.11398	3.2849	4.29564	5.11327	4.08291	2.90541	3.96239	3.55522
6.23333	5.56805	4.77286	3.8025	4.61205	4.32756	4.09535	5.27461	7.10322	6.39344	4.28827	4.811	5.15524	4.32208	4.4658	3.40402	4.63402	3.66972	4.16881	2.91762	2.76368	4.86486	5.41516	6.08914	4.55927	3.46376	3.45277	3.21637
10.2	5.96454	5.939	5.13644	5.62436	6.27746	5.50511	6.64948	9.46502	7.82609	4.69457	5.99029	6.3326	5.3281	5.24087	3.61446	6.01875	4.19828	4.75267	4.11033	3.07612	5.49887	6.84002	7.10511	6.2069	3.50438	3.44626	3.18596
14.2	7.68049	6.85139	7.34319	6.5639	7.55054	7.0632	8.8729	10.5523	9.95608	5.38213	7.91878	8.42434	5.88235	5.84316	6.0576	7.73506	6.10871	6.06475	4.42523	4.80538	6.27387	9.14962	7.91572	6.79825	4.29799	3.46591	2.35669
20.6667	10.5288	8.79696	9.27342	9.61896	8.78342	10.1927	11.5668	13.3426	12.1457	7.53769	9.18221	10.2564	8.10114	7.63723	6.80934	9.78448	8.68616	8.29167	6.08821	6.3059	8.85417	11.7432	10.2375	8.88538	4.72356	4.65872	2.83645
24	10.9398	9.51718	10.6025	10.0227	10.8395	11.2255	12.5604	14.221	13.5287	7.60291	10.3137	10.9927	9.47159	9.2827	7.96626	11.5254	9.85556	9.26002	6.72308	7.40741	8.66021	13.2555	11.274	9.97429	5.43649	5.31527	3.21407
26.85	12.3178	10.9282	11.8529	10.3033	11.6923	11.9447	13.6957	15.5873	14.1813	8.10682	11.2037	12.1928	10.6486	9.36209	8.0481	11.6667	11.32	9.88048	7.67136	7.67888	9.7393	14.5545	12.4809	10.7451	5.66437	5.69358	3.46269
30.2333	12.9242	11.1211	13.1006	11.7621	12.6219	13.999	15.2082	16.3015	14.4989	9.8384	12.5688	13.3174	11.6025	9.53691	8.56242	13.0595	12.2764	10.4542	8.7439	9.00634	11.0355	15.8053	13.602	11.2417	6.58588	6.75258	3.94814
34.2	14.232	11.7727	14.735	12.3532	13.538	14.9524	16.5557	17.09	16.2771	10.711	13.3721	14.6168	12.435	11.155	9.7961	14.8358	12.7549	11.3566	8.84383	9.42775	12.233	16.8155	14.9127	12.7162	7.3843	7.41627	4.24278
38.2	15.0572	12.6869	15.7753	13.2284	14.5927	16.3411	18.1255	18.8584	16.2185	11.0393	14.7541	15.5156	12.7806	13.0397	10.2497	15.7326	13.8468	12.7334	9.98741	10.4167	12.6714	18.2664	15.984	14.2857	7.65306	7.81469	4.90479
44.6667	17.0037	15.5856	17.7681	14.9606	16.7485	18.2692	20.3138	19.4832	18.4734	13.3695	16.8592	17.2127	14.8299	14.2009	11.9167	16.4202	14.9515	14.9379	11.7861	11.5355	14.4068	20.4755	18.0976	15.9194	9.1994	8.54969	5.89226
48	17.2492	16.0035	19.0893	16.4066	17.0471	18.8909	20.1029	19.829	19.4218	14.3169	17.3876	17.7931	14.2922	14.6909	12.9683	17.3504	15.7116	14.7292	11.9397	11.5051	14.4316	21.415	20.4611	16.6498	9.07363	8.82609	6.4053
50.85	17.3993	16.3786	18.8393	16.4245	16.7234	20.5151	21.1306	20.3605	19.2975	14.6436	18.5696	18.1408	14.9354	15.9588	12.6333	17.1215	16.1481	15.0283	12.6154	11.1233	15.4321	22.1964	20.7637	17.1601	8.60113	8.66176	6.5976
54.2333	18.8782	16.8111	18.785	17.4018	17.3725	20.8723	21.5054	20.7292	20.0402	14.579	19.4811	18.0461	14.9247	16.2828	13.2564	18.7942	16.5419	16.6377	12.8858	11.7962	14.9765	22.9949	20.7696	17.3145	9.11602	8.66274	7.64365
58.2	18.5316	17.5453	20.2285	18.3537	18.619	21.8279	22.3765	21.0737	20.7968	14.9919	19.9836	18.4941	14.9913	17.6844	13.7806	18.2314	17.0988	16.3265	13.3962	12.4567	15.4822	23.2852	21.6994	18.1818	9.24138	9.14333	7.3423
62.2	19.5492	17.6885	20.7155	19.2762	18.8808	22.0466	23.4721	21.6503	20.751	15.0179	20.2501	17.9819	15.9292	18.8054	14.297	18.2464	17.5487	16.5394	13.6414	13.1071	15.3814	25.2848	22.8339	18.3582	9.53457	10.055	7.24638
68.6667	19.8648	18.7881	21.4869	19.5619	19.5603	23.4911	23.9657	21.7524	21.9653	16.428	20.8783	19.3834	17.1654	19.7582	15.5021	18.906	18.5343	16.8307	15.0685	13.8086	15.4643	26.8041	23.4355	17.9792	8.43011	11.239	7.40894
72	19.5426	18.6893	21.8349	19.9774	19.3692	23.7538	24.8987	21.6155	21.5107	16.2919	20.3967	18.8062	17.2794	19.9029	15.0721	19.9598	18.3787	16.8815	15.2151	13.6421	15.6225	27.3955	24.3787	17.8692	8.97544	11.1952	7.43187

## Sheet: Assay8
TOP
Elapsed (hr)	p38i (0.5uM) + JNK (0.5uM) (0.5X)			p38i (1uM) + JNK (1uM) (1X)			p38i (2uM) + JNK (2uM) (2X)			MEKi (0.5nM) + MLKi (25nM) (0.5X)			MEKi (1nM) + MLKi (50nM) (1X)			MEKi (2nM) + MLKi (100nM) (2X)			4-drug combo (0.5X)			4-drug combo (1X)			4-drug combo (2X)			EGF			no EGF
0	1573	1581	1661	1548	1576	1543	1570	1304	1521	1466	1591	1547	1579	1590	1543	1546	1542	1480	1566	1558	1518	1360	1459	1407	1485	1360	1376	1516	1350	1375	1318	1408	1245
2.85	1622	1654	1679	1558	1615	1606	1626	1321	1541	1521	1623	1576	1614	1619	1569	1576	1595	1516	1600	1634	1560	1417	1541	1465	1513	1423	1405	1536	1399	1410	1338	1449	1261
6.23333	1667	1703	1722	1618	1647	1643	1707	1365	1579	1573	1683	1630	1650	1678	1610	1607	1655	1600	1647	1633	1640	1468	1554	1533	1573	1471	1470	1597	1442	1457	1369	1486	1296
10.2	1724	1720	1746	1663	1665	1709	1737	1403	1660	1613	1720	1666	1725	1740	1653	1661	1698	1614	1672	1714	1689	1496	1657	1586	1643	1502	1518	1622	1435	1504	1380	1524	1341
14.2	1715	1722	1800	1666	1708	1723	1765	1418	1658	1636	1762	1682	1762	1756	1719	1719	1763	1660	1707	1724	1706	1555	1673	1595	1702	1508	1544	1671	1445	1511	1418	1541	1374
20.6667	1745	1822	1847	1737	1759	1725	1768	1412	1708	1711	1790	1792	1831	1897	1769	1769	1850	1763	1764	1762	1769	1603	1695	1678	1755	1563	1579	1734	1488	1592	1482	1620	1416
24	1783	1814	1847	1779	1748	1759	1787	1405	1711	1689	1836	1795	1855	1911	1795	1827	1847	1801	1780	1757	1838	1608	1750	1730	1786	1601	1596	1709	1505	1571	1472	1645	1367
26.85	1793	1849	1856	1786	1783	1783	1814	1434	1724	1676	1833	1802	1870	1910	1815	1850	1864	1775	1808	1756	1833	1701	1764	1783	1823	1609	1621	1701	1500	1545	1440	1622	1397
30.2333	1767	1864	1853	1821	1762	1806	1843	1431	1718	1623	1862	1834	1907	1947	1847	1901	1895	1808	1811	1767	1854	1694	1745	1807	1883	1637	1669	1694	1469	1513	1441	1660	1396
34.2	1797	1876	1854	1847	1785	1809	1863	1470	1708	1652	1887	1850	1926	1979	1836	1917	1934	1842	1867	1783	1866	1716	1815	1842	1955	1702	1757	1700	1475	1532	1435	1653	1406
38.2	1843	1882	1880	1874	1780	1810	1933	1478	1673	1694	1941	1871	1972	1996	1865	1967	1972	1901	1881	1798	1903	1806	1877	1932	2015	1805	1851	1700	1479	1530	1483	1676	1463
44.6667	1884	1917	1952	1928	1855	1861	1989	1523	1693	1715	1986	1893	2050	2095	1962	2104	2113	1970	1930	1896	1968	1968	2008	2016	2175	1954	2009	1738	1500	1531	1495	1725	1483
48	1951	1942	1948	1958	1882	1879	2024	1534	1754	1702	2015	1923	2084	2144	2019	2170	2151	2019	1949	1940	1995	1996	2050	2035	2221	2074	2039	1728	1512	1540	1531	1763	1506
50.85	1945	1979	1996	1985	1912	1879	2057	1554	1762	1726	2048	1958	2112	2168	2036	2206	2199	2043	2001	1943	2016	2069	2054	2060	2283	2125	2111	1726	1510	1543	1538	1798	1519
54.2333	1966	2008	1997	1989	1918	1872	2077	1587	1788	1755	2057	1959	2149	2182	2088	2272	2259	2119	2047	1993	2049	2121	2113	2107	2355	2219	2209	1790	1519	1532	1554	1827	1524
58.2	2022	2025	2008	2038	1914	1884	2077	1603	1811	1812	2105	1982	2150	2234	2099	2316	2298	2135	2075	2010	2136	2196	2185	2189	2433	2267	2287	1783	1505	1555	1585	1845	1523
62.2	2086	2063	2031	2052	1934	1921	2138	1606	1829	1820	2119	2023	2163	2254	2129	2360	2343	2176	2117	2092	2186	2255	2214	2240	2582	2301	2337	1768	1507	1534	1616	1876	1578
68.6667	2086	2044	2059	2122	1911	1900	2136	1649	1817	1835	2160	2044	2197	2287	2138	2461	2436	2242	2107	2078	2218	2371	2346	2334	2640	2429	2473	1761	1478	1536	1609	1911	1596
72	2142	2085	2078	2126	1911	1890	2158	1665	1851	1843	2133	2014	2251	2283	2112	2464	2423	2225	2107	2099	2261	2465	2374	2405	2714	2449	2540	1722	1488	1527	1593	1844	1620
BOTTOM
Elapsed (hr)	p38i (0.5uM) + JNK (0.5uM) (0.5X)			p38i (1uM) + JNK (1uM) (1X)			p38i (2uM) + JNK (2uM) (2X)			MEKi (0.5nM) + MLKi (25nM) (0.5X)			MEKi (1nM) + MLKi (50nM) (1X)			MEKi (2nM) + MLKi (100nM) (2X)			4-drug combo (0.5X)			4-drug combo (1X)			4-drug combo (2X)			EGF			no EGF
0	19	13	17	9	21	14	28	21	16	21	22	21	16	7	10	5	13	22	13	12	27	17	27	21	22	15	9	15	16	11	15	14	20
2.85	18	16	21	9	24	24	32	26	26	21	25	25	20	10	17	9	15	25	22	20	33	14	31	13	24	21	14	11	20	16	19	21	25
6.23333	14	18	28	14	33	22	43	45	33	30	20	28	22	23	11	11	22	28	20	25	40	24	27	22	27	19	21	26	20	26	23	22	23
10.2	26	28	38	22	38	30	54	42	41	45	31	37	32	30	19	17	27	31	32	35	34	29	30	33	28	21	27	33	27	39	33	30	36
14.2	31	42	58	30	65	47	69	51	58	69	52	54	44	49	29	27	33	45	51	53	52	37	44	33	36	34	35	47	41	56	51	38	38
20.6667	42	71	113	44	104	86	78	65	87	96	90	83	75	75	66	44	59	74	59	83	68	58	83	45	48	45	37	74	82	100	79	66	53
24	57	76	122	61	126	108	96	72	99	116	97	93	90	99	69	59	64	82	70	109	81	61	99	59	59	50	45	88	74	110	98	64	66
26.85	70	84	133	72	131	125	101	84	115	137	125	121	105	117	96	67	79	86	70	113	96	62	98	66	64	70	48	122	94	144	119	72	61
30.2333	75	103	136	66	151	132	139	105	115	151	126	134	120	138	110	80	93	103	93	134	122	63	102	83	72	72	65	141	117	169	126	86	79
34.2	98	111	176	86	177	152	119	117	147	168	140	167	143	151	141	104	102	137	116	155	146	80	125	98	82	90	78	160	145	183	149	111	92
38.2	118	151	189	95	201	163	148	139	164	179	181	175	159	166	158	106	122	143	127	163	162	79	131	113	91	103	83	192	166	204	161	124	105
44.6667	131	191	219	127	217	206	192	155	183	216	212	207	204	196	207	140	146	158	159	199	192	104	158	145	118	123	107	210	189	234	182	160	142
48	130	217	237	113	223	223	198	169	203	230	213	238	222	218	232	145	156	185	184	210	227	105	174	165	120	133	104	234	209	247	183	183	146
50.85	138	245	254	118	238	248	203	190	199	233	241	248	247	235	242	148	169	166	192	232	242	117	176	171	118	135	116	256	226	254	195	177	146
54.2333	152	240	280	128	265	254	226	215	208	252	248	277	246	250	263	168	194	207	202	220	252	119	180	189	133	138	121	251	247	270	197	191	144
58.2	147	247	287	140	272	263	233	225	206	251	269	322	261	255	285	190	198	214	241	267	262	158	204	197	142	142	133	284	264	303	220	215	164
62.2	157	270	291	151	277	273	260	276	217	272	277	299	272	265	298	187	199	215	263	265	268	154	222	228	138	151	133	291	291	310	239	205	192
68.6667	166	287	320	145	306	297	251	268	242	278	302	311	301	298	288	187	211	219	285	301	291	143	260	264	161	167	153	297	287	345	239	244	205
72	170	272	324	158	312	305	284	282	238	270	307	340	306	307	287	199	211	221	287	289	300	139	235	255	157	168	137	286	323	342	240	247	218
TOTAL
Elapsed (hr)	p38i (0.5uM) + JNK (0.5uM) (0.5X)			p38i (1uM) + JNK (1uM) (1X)			p38i (2uM) + JNK (2uM) (2X)			MEKi (0.5nM) + MLKi (25nM) (0.5X)			MEKi (1nM) + MLKi (50nM) (1X)			MEKi (2nM) + MLKi (100nM) (2X)			4-drug combo (0.5X)			4-drug combo (1X)			4-drug combo (2X)			EGF			no EGF
0	1592	1594	1678	1557	1597	1557	1598	1325	1537	1487	1613	1568	1595	1597	1553	1551	1555	1502	1579	1570	1545	1377	1486	1428	1507	1375	1385	1531	1366	1386	1333	1422	1265
2.85	1640	1670	1700	1567	1639	1630	1658	1347	1567	1542	1648	1601	1634	1629	1586	1585	1610	1541	1622	1654	1593	1431	1572	1478	1537	1444	1419	1547	1419	1426	1357	1470	1286
6.23333	1681	1721	1750	1632	1680	1665	1750	1410	1612	1603	1703	1658	1672	1701	1621	1618	1677	1628	1667	1658	1680	1492	1581	1555	1600	1490	1491	1623	1462	1483	1392	1508	1319
10.2	1750	1748	1784	1685	1703	1739	1791	1445	1701	1658	1751	1703	1757	1770	1672	1678	1725	1645	1704	1749	1723	1525	1687	1619	1671	1523	1545	1655	1462	1543	1413	1554	1377
14.2	1746	1764	1858	1696	1773	1770	1834	1469	1716	1705	1814	1736	1806	1805	1748	1746	1796	1705	1758	1777	1758	1592	1717	1628	1738	1542	1579	1718	1486	1567	1469	1579	1412
20.6667	1787	1893	1960	1781	1863	1811	1846	1477	1795	1807	1880	1875	1906	1972	1835	1813	1909	1837	1823	1845	1837	1661	1778	1723	1803	1608	1616	1808	1570	1692	1561	1686	1469
24	1840	1890	1969	1840	1874	1867	1883	1477	1810	1805	1933	1888	1945	2010	1864	1886	1911	1883	1850	1866	1919	1669	1849	1789	1845	1651	1641	1797	1579	1681	1570	1709	1433
26.85	1863	1933	1989	1858	1914	1908	1915	1518	1839	1813	1958	1923	1975	2027	1911	1917	1943	1861	1878	1869	1929	1763	1862	1849	1887	1679	1669	1823	1594	1689	1559	1694	1458
30.2333	1842	1967	1989	1887	1913	1938	1982	1536	1833	1774	1988	1968	2027	2085	1957	1981	1988	1911	1904	1901	1976	1757	1847	1890	1955	1709	1734	1835	1586	1682	1567	1746	1475
34.2	1895	1987	2030	1933	1962	1961	1982	1587	1855	1820	2027	2017	2069	2130	1977	2021	2036	1979	1983	1938	2012	1796	1940	1940	2037	1792	1835	1860	1620	1715	1584	1764	1498
38.2	1961	2033	2069	1969	1981	1973	2081	1617	1837	1873	2122	2046	2131	2162	2023	2073	2094	2044	2008	1961	2065	1885	2008	2045	2106	1908	1934	1892	1645	1734	1644	1800	1568
44.6667	2015	2108	2171	2055	2072	2067	2181	1678	1876	1931	2198	2100	2254	2291	2169	2244	2259	2128	2089	2095	2160	2072	2166	2161	2293	2077	2116	1948	1689	1765	1677	1885	1625
48	2081	2159	2185	2071	2105	2102	2222	1703	1957	1932	2228	2161	2306	2362	2251	2315	2307	2204	2133	2150	2222	2101	2224	2200	2341	2207	2143	1962	1721	1787	1714	1946	1652
50.85	2083	2224	2250	2103	2150	2127	2260	1744	1961	1959	2289	2206	2359	2403	2278	2354	2368	2209	2193	2175	2258	2186	2230	2231	2401	2260	2227	1982	1736	1797	1733	1975	1665
54.2333	2118	2248	2277	2117	2183	2126	2303	1802	1996	2007	2305	2236	2395	2432	2351	2440	2453	2326	2249	2213	2301	2240	2293	2296	2488	2357	2330	2041	1766	1802	1751	2018	1668
58.2	2169	2272	2295	2178	2186	2147	2310	1828	2017	2063	2374	2304	2411	2489	2384	2506	2496	2349	2316	2277	2398	2354	2389	2386	2575	2409	2420	2067	1769	1858	1805	2060	1687
62.2	2243	2333	2322	2203	2211	2194	2398	1882	2046	2092	2396	2322	2435	2519	2427	2547	2542	2391	2380	2357	2454	2409	2436	2468	2720	2452	2470	2059	1798	1844	1855	2081	1770
68.6667	2252	2331	2379	2267	2217	2197	2387	1917	2059	2113	2462	2355	2498	2585	2426	2648	2647	2461	2392	2379	2509	2514	2606	2598	2801	2596	2626	2058	1765	1881	1848	2155	1801
72	2312	2357	2402	2284	2223	2195	2442	1947	2089	2113	2440	2354	2557	2590	2399	2663	2634	2446	2394	2388	2561	2604	2609	2660	2871	2617	2677	2008	1811	1869	1833	2091	1838
% INVADED
Elapsed (hr)	p38i (0.5uM) + JNK (0.5uM) (0.5X)			p38i (1uM) + JNK (1uM) (1X)			p38i (2uM) + JNK (2uM) (2X)			MEKi (0.5nM) + MLKi (25nM) (0.5X)			MEKi (1nM) + MLKi (50nM) (1X)			MEKi (2nM) + MLKi (100nM) (2X)			4-drug combo (0.5X)			4-drug combo (1X)			4-drug combo (2X)			EGF			no EGF
0	1.19347	0.815558	1.01311	0.578035	1.31497	0.899165	1.75219	1.58491	1.04099	1.41224	1.36392	1.33929	1.00313	0.438322	0.643915	0.322373	0.836013	1.46471	0.823306	0.764331	1.74757	1.23457	1.81696	1.47059	1.45985	1.09091	0.649819	0.979752	1.1713	0.793651	1.12528	0.984529	1.58103
2.85	1.09756	0.958084	1.23529	0.574346	1.46431	1.47239	1.93004	1.93022	1.65922	1.36187	1.51699	1.56152	1.22399	0.613874	1.07188	0.567823	0.931677	1.62232	1.35635	1.20919	2.07156	0.978337	1.97201	0.879567	1.56148	1.45429	0.98661	0.711054	1.40944	1.12202	1.40015	1.42857	1.94401
6.23333	0.832838	1.0459	1.6	0.857843	1.96429	1.32132	2.45714	3.19149	2.04715	1.87149	1.1744	1.68878	1.31579	1.35215	0.678593	0.679852	1.31187	1.7199	1.19976	1.50784	2.38095	1.60858	1.70778	1.41479	1.6875	1.27517	1.40845	1.60197	1.36799	1.7532	1.6523	1.45889	1.74375
10.2	1.48571	1.60183	2.13004	1.30564	2.23136	1.72513	3.01508	2.90657	2.41035	2.71411	1.77042	2.17264	1.82129	1.69492	1.13636	1.01311	1.56522	1.8845	1.87793	2.00114	1.9733	1.90164	1.7783	2.0383	1.67564	1.37886	1.74757	1.99396	1.84679	2.52754	2.33546	1.9305	2.61438
14.2	1.77549	2.38095	3.12164	1.76887	3.6661	2.65537	3.76227	3.47175	3.37995	4.04692	2.86659	3.1106	2.43632	2.71468	1.65904	1.54639	1.83742	2.6393	2.90102	2.98255	2.95791	2.32412	2.56261	2.02703	2.07135	2.20493	2.21659	2.73574	2.75908	3.57371	3.47175	2.40659	2.69122
20.6667	2.35031	3.75066	5.76531	2.47052	5.58239	4.74876	4.22535	4.40081	4.8468	5.31267	4.78723	4.42667	3.93494	3.80325	3.59673	2.42692	3.09062	4.02831	3.23642	4.49864	3.70169	3.49187	4.66817	2.61172	2.66223	2.79851	2.2896	4.09292	5.22293	5.91017	5.06086	3.91459	3.6079
24	3.09783	4.02116	6.19604	3.31522	6.72359	5.78468	5.09825	4.87475	5.46961	6.42659	5.01811	4.92585	4.62725	4.92537	3.70172	3.12831	3.34903	4.35475	3.78378	5.84137	4.22095	3.65488	5.35425	3.29793	3.19783	3.02847	2.74223	4.89705	4.68651	6.54372	6.24204	3.74488	4.60572
26.85	3.75738	4.34558	6.68678	3.87513	6.84431	6.55136	5.27415	5.5336	6.2534	7.55654	6.38407	6.29225	5.31646	5.77208	5.02355	3.49504	4.06588	4.62117	3.72737	6.04601	4.97667	3.51673	5.26316	3.5695	3.39163	4.16915	2.87597	6.69227	5.89711	8.52575	7.6331	4.2503	4.18381
30.2333	4.07166	5.2364	6.83761	3.49762	7.89336	6.81115	7.01312	6.83594	6.27387	8.51184	6.33803	6.80894	5.92008	6.61871	5.62085	4.03836	4.67807	5.38985	4.88445	7.04892	6.17409	3.58566	5.52247	4.39153	3.68286	4.21299	3.74856	7.68392	7.37705	10.0476	8.04084	4.92554	5.35593
34.2	5.1715	5.58631	8.66995	4.44904	9.02141	7.75115	6.00404	7.3724	7.92453	9.23077	6.90676	8.27962	6.91155	7.0892	7.13202	5.14597	5.00982	6.92269	5.84972	7.99794	7.25646	4.45434	6.4433	5.05155	4.02553	5.02232	4.25068	8.60215	8.95062	10.6706	9.40657	6.29252	6.14152
38.2	6.01734	7.42745	9.13485	4.82478	10.1464	8.26153	7.11197	8.59617	8.9276	9.55686	8.52969	8.55327	7.46129	7.67808	7.81018	5.11336	5.82617	6.99609	6.3247	8.31209	7.84504	4.19098	6.5239	5.52567	4.32099	5.39832	4.29162	10.148	10.0912	11.7647	9.79319	6.88889	6.69643
44.6667	6.50124	9.06072	10.0875	6.18005	10.473	9.96613	8.8033	9.23719	9.7548	11.1859	9.64513	9.85714	9.05058	8.55522	9.54357	6.23886	6.46304	7.42481	7.6113	9.49881	8.88889	5.01931	7.29455	6.70986	5.1461	5.922	5.05671	10.7803	11.1901	13.2578	10.8527	8.48806	8.73846
48	6.247	10.0509	10.8467	5.4563	10.5938	10.6089	8.91089	9.92366	10.373	11.9048	9.56014	11.0134	9.62706	9.22947	10.3065	6.2635	6.76203	8.39383	8.62635	9.76744	10.216	4.99762	7.82374	7.5	5.12601	6.02628	4.85301	11.9266	12.1441	13.822	10.6768	9.40391	8.83777
50.85	6.62506	11.0162	11.2889	5.61103	11.0698	11.6596	8.9823	10.8945	10.1479	11.8938	10.5286	11.2421	10.4705	9.77944	10.6234	6.28717	7.13682	7.51471	8.75513	10.6667	10.7174	5.35224	7.89238	7.66472	4.91462	5.97345	5.2088	12.9162	13.0184	14.1347	11.2522	8.96203	8.76877
54.2333	7.17658	10.6762	12.2969	6.04629	12.1393	11.9473	9.81329	11.9312	10.4208	12.5561	10.7592	12.3882	10.2714	10.2796	11.1867	6.88525	7.90868	8.8994	8.98177	9.94126	10.9518	5.3125	7.84998	8.23171	5.34566	5.8549	5.19313	12.2979	13.9864	14.9834	11.2507	9.46482	8.63309
58.2	6.77732	10.8715	12.5054	6.42792	12.4428	12.2497	10.0866	12.3085	10.2132	12.1667	11.3311	13.9757	10.8254	10.2451	11.9547	7.5818	7.93269	9.11026	10.4059	11.726	10.9258	6.71198	8.53914	8.2565	5.51456	5.89456	5.49587	13.7397	14.9237	16.3079	12.1884	10.4369	9.7214
62.2	6.99955	11.5731	12.5323	6.85429	12.5283	12.443	10.8424	14.6652	10.6061	13.0019	11.5609	12.8768	11.1704	10.52	12.2785	7.34197	7.82848	8.99205	11.0504	11.2431	10.9209	6.39269	9.1133	9.23825	5.07353	6.15824	5.38462	14.1331	16.1846	16.8113	12.8841	9.85103	10.8475
68.6667	7.37123	12.3123	13.451	6.39612	13.8024	13.5184	10.5153	13.9802	11.7533	13.1566	12.2665	13.2059	12.0496	11.528	11.8714	7.06193	7.97129	8.89882	11.9147	12.6524	11.5982	5.68815	9.97698	10.1617	5.74795	6.43297	5.82635	14.4315	16.2606	18.3413	12.9329	11.3225	11.3826
72	7.35294	11.5401	13.4888	6.91769	14.0351	13.8952	11.6298	14.4838	11.393	12.778	12.582	14.4435	11.9671	11.8533	11.9633	7.47278	8.01063	9.03516	11.9883	12.1022	11.7142	5.33794	9.00728	9.58647	5.46848	6.41956	5.11767	14.243	17.8355	18.2986	13.0933	11.8125	11.8607

## Sheet: Assay9
TOP
Elapsed (hr)	no EGF			EGF			MEKi 1nM + MLKi 50nM			p38i 1uM + JNKi 1uM			MEKi + MLKi + p38i 1uM			MEKi + MLKi + p38i 2uM			MEKi + MLKi + JNKi 1uM			MEKi + MLKi + JNKi 2uM			p38i + JNKi + MEKi 1nM			p38i + JNKi + MEKi 2nM			p38i + JNKi + MLKi 50nM			p38i + JNKi + MLKi 100nM
0	1212	1240	1294	1403	1377	1411	1465	1413	1435	1480	1502	1468	1326	1394	1355	1397	1345	1335	1039	1258	1347	1312	1334	1317	1240	1221	1269	1350	1215	1170	1324	1154	1084	1200	1153	1066
3.96667	1080	1330	1369	1355	1336	1584	1603	1445	1495	1563	1598	1551	1429	1467	1449	1472	1450	1314	1362	1425	1445	1383	1411	1381	1211	1327	1330	1416	1280	1231	1407	1207	1163	1285	1295	1155
7.96667	1143	1425	1486	1583	1420	1669	1645	1689	1571	1642	1628	1642	1506	1497	1502	1541	1578	1534	1446	1522	1549	1463	1475	1433	1227	1389	1400	1478	1319	1252	1506	1253	1211	1382	1360	1221
14.4333	1141	1399	1420	1672	1630	1700	1760	1767	1648	1707	1669	1654	1504	1563	1599	1640	1598	1620	1459	1590	1599	1507	1563	1515	1060	1436	1417	1531	1325	1301	1530	1272	1228	1399	1399	1251
17.7667	1134	1409	1611	1695	1649	1701	1766	1817	1691	1717	1702	1678	1718	1617	1632	1645	1601	1600	1486	1581	1618	1524	1582	1532	1075	1446	1457	1525	1348	1292	1535	1298	1244	1447	1418	1299
20.6167	1121	1395	1611	1738	1698	1707	1847	1845	1727	1711	1710	1684	1761	1606	1669	1636	1622	1615	1481	1640	1639	1527	1634	1536	1511	1485	1429	1538	1319	1324	1544	1285	1259	1445	1432	1286
24	1144	1355	1632	1778	1684	1716	1841	1839	1724	1699	1745	1679	1752	1593	1640	1655	1644	1613	1510	1652	1624	1554	1618	1533	1517	1467	1401	1523	1310	1309	1533	1305	1249	1408	1435	1263
27.9667	973	1370	1656	1735	1633	1685	1871	1901	1708	1706	1718	1673	1782	1617	1644	1665	1632	1613	1511	1628	1653	1573	1600	1534	1483	1462	1427	1473	1286	1274	1548	1282	1291	1394	1419	1251
31.9667	1109	1166	1621	1729	1642	1683	1883	1874	1720	1696	1703	1643	1795	1633	1666	1689	1673	1674	1558	1651	1709	1574	1626	1513	1470	1466	1444	1459	1267	1301	1535	1251	1262	1413	1396	1234
38.4333	1133	1198	1632	1682	1626	1674	1917	1946	1764	1749	1689	1585	1874	1667	1696	1756	1728	1730	1609	1671	1735	1589	1679	1545	1521	1484	1441	1497	1241	1302	1562	1238	1226	1423	1440	1210
41.7667	978	1430	1618	1703	1611	1627	1941	1947	1793	1732	1689	1606	1885	1676	1691	1794	1785	1783	1644	1695	1785	1617	1721	1553	1503	1489	1455	1526	1234	1335	1542	1225	1228	1439	1491	1193
44.6167	983	1432	1624	1724	1602	1631	2011	2034	1838	1751	1721	1577	1918	1687	1726	1831	1785	1831	1660	1746	1784	1656	1750	1570	1521	1539	1436	1530	1225	1372	1547	1239	1242	1455	1509	1218
48	1003	1465	1652	1722	1621	1620	2032	2034	1859	1750	1730	1594	1987	1756	1745	1853	1816	1845	1692	1745	1814	1702	1741	1584	1508	1551	1450	1539	1226	1424	1574	1238	1244	1474	1531	1237
51.9667	1008	1456	1685	1750	1627	1633	2108	2068	1902	1795	1737	1599	2035	1815	1812	1933	1893	1907	1738	1791	1856	1734	1802	1626	1545	1612	1501	1628	1229	1400	1588	1266	1285	1504	1535	1258
55.9667	1014	1465	1699	1738	1631	1635	2148	2102	1961	1806	1746	1591	2086	1799	1849	1995	1920	1930	1761	1813	1867	1700	1805	1636	1558	1652	1540	1634	1255	1439	1587	1279	1281	1534	1570	1240
62.4333	1026	1484	1704	1770	1667	1642	2256	2188	1990	1831	1754	1637	2184	1895	1923	1983	2011	1961	1795	1827	1998	1763	1857	1662	1612	1672	1506	1645	1269	1466	1630	1288	1286	1553	1614	1237
65.7667	2017	1917	1938	1760	1692	1628	2283	2187	2033	1853	1812	1658	2263	1923	1950	2043	2022	2018	1957	1896	2025	1809	1881	1687	1641	1689	1529	1676	1260	1497	1696	1285	1302	1539	1609	1303
68.6167	1981	1908	1914	1739	1666	1616	2260	2237	2105	1867	1804	1604	2292	1931	1936	2041	2060	2002	2007	1848	2077	1818	1879	1711	1644	1693	1540	1706	1220	1530	1727	1329	1290	1569	1597	1282
72	2013	1895	1917	1734	1659	1638	2307	2247	2119	1877	1818	1625	2270	1973	1929	2033	2057	1995	2048	1884	2040	1847	1905	1675	1677	1691	1557	1714	1221	1539	1704	1300	1298	1581	1644	1254
BOTTOM
Elapsed (hr)	no EGF			EGF			MEKi 1nM + MLKi 50nM			p38i 1uM + JNKi 1uM			MEKi + MLKi + p38i 1uM			MEKi + MLKi + p38i 2uM			MEKi + MLKi + JNKi 1uM			MEKi + MLKi + JNKi 2uM			p38i + JNKi + MEKi 1nM			p38i + JNKi + MEKi 2nM			p38i + JNKi + MLKi 50nM			p38i + JNKi + MLKi 100nM
0	3	34	15	15	11	17	10	14	6	27	23	47	16	23	35	22	12	28	13	20	29	13	30	23	40	37	30	38	41	44	48	37	51	48	44	54
3.96667	13	29	23	20	12	34	7	24	19	26	26	59	33	31	24	27	19	22	24	13	34	15	18	35	59	62	66	75	76	58	53	59	61	67	51	70
7.96667	12	35	21	36	18	37	14	22	21	36	41	76	38	29	35	34	28	31	27	18	46	20	27	47	85	71	91	94	94	84	69	68	82	80	64	99
14.4333	22	44	33	49	47	57	26	34	31	45	59	111	34	44	60	42	29	42	48	39	41	32	47	69	109	114	112	130	143	118	104	118	110	130	91	136
17.7667	30	42	35	56	53	68	36	40	35	57	58	122	42	60	73	53	33	57	59	51	52	38	47	100	121	125	135	134	161	126	132	149	124	141	98	153
20.6167	28	37	43	66	59	90	47	44	45	64	70	142	51	67	77	55	35	72	60	69	62	37	58	102	179	159	155	154	173	137	165	162	151	160	118	168
24	30	53	42	76	70	93	51	55	53	73	80	158	50	65	84	56	50	80	67	72	70	47	71	134	201	146	162	169	181	151	171	187	172	188	120	176
27.9667	28	62	50	100	95	130	60	75	70	86	88	170	65	72	98	72	58	97	70	91	101	54	89	140	201	161	188	175	197	165	197	197	187	209	137	192
31.9667	43	104	52	121	98	126	59	90	71	86	96	193	68	93	110	79	76	101	83	111	98	71	92	137	221	199	191	189	210	190	238	216	207	221	162	210
38.4333	45	87	61	135	132	155	87	102	94	109	115	221	83	107	130	92	88	117	99	127	111	84	110	156	255	190	245	225	235	193	258	249	217	260	204	247
41.7667	36	77	60	149	137	166	86	126	87	135	123	229	89	123	148	93	94	124	101	150	117	85	120	157	267	211	250	225	259	195	274	269	256	260	212	247
44.6167	47	84	65	168	139	167	92	130	92	140	124	255	89	127	155	114	99	134	125	139	128	98	142	168	281	205	268	233	244	221	277	290	280	275	223	263
48	51	85	76	170	157	189	101	141	103	147	127	262	92	122	147	103	88	136	133	159	138	116	154	180	282	230	250	260	257	223	319	302	285	291	245	267
51.9667	48	91	82	173	159	198	109	145	112	153	149	288	112	130	157	110	91	147	147	180	154	105	154	205	299	228	279	260	252	232	333	333	279	315	244	282
55.9667	45	89	86	196	168	196	104	152	113	185	148	300	112	129	168	118	107	155	156	195	168	112	160	213	316	251	288	288	252	236	342	320	297	305	286	293
62.4333	48	108	84	210	182	225	118	177	129	203	154	323	126	143	185	127	111	159	171	201	192	139	182	229	316	251	320	304	264	248	368	363	335	347	287	302
65.7667	81	131	99	205	199	207	120	176	137	205	142	320	134	138	183	116	116	150	180	205	185	162	170	231	307	235	319	309	265	241	362	375	330	350	292	293
68.6167	87	121	101	208	199	194	132	187	148	222	157	312	128	165	195	122	125	154	198	202	192	160	188	236	304	251	314	312	271	261	365	370	348	347	293	302
72	83	123	87	223	195	220	142	186	138	224	160	328	140	156	200	139	116	161	197	213	195	152	195	249	292	248	313	306	283	277	381	402	380	372	331	305
TOP + BOTTOM
Elapsed (hr)	no EGF			EGF			MEKi 1nM + MLKi 50nM			p38i 1uM + JNKi 1uM			MEKi + MLKi + p38i 1uM			MEKi + MLKi + p38i 2uM			MEKi + MLKi + JNKi 1uM			MEKi + MLKi + JNKi 2uM			p38i + JNKi + MEKi 1nM			p38i + JNKi + MEKi 2nM			p38i + JNKi + MLKi 50nM			p38i + JNKi + MLKi 100nM
0	1215	1274	1309	1418	1388	1428	1475	1427	1441	1507	1525	1515	1342	1417	1390	1419	1357	1363	1052	1278	1376	1325	1364	1340	1280	1258	1299	1388	1256	1214	1372	1191	1135	1248	1197	1120
3.96667	1093	1359	1392	1375	1348	1618	1610	1469	1514	1589	1624	1610	1462	1498	1473	1499	1469	1336	1386	1438	1479	1398	1429	1416	1270	1389	1396	1491	1356	1289	1460	1266	1224	1352	1346	1225
7.96667	1155	1460	1507	1619	1438	1706	1659	1711	1592	1678	1669	1718	1544	1526	1537	1575	1606	1565	1473	1540	1595	1483	1502	1480	1312	1460	1491	1572	1413	1336	1575	1321	1293	1462	1424	1320
14.4333	1163	1443	1453	1721	1677	1757	1786	1801	1679	1752	1728	1765	1538	1607	1659	1682	1627	1662	1507	1629	1640	1539	1610	1584	1169	1550	1529	1661	1468	1419	1634	1390	1338	1529	1490	1387
17.7667	1164	1451	1646	1751	1702	1769	1802	1857	1726	1774	1760	1800	1760	1677	1705	1698	1634	1657	1545	1632	1670	1562	1629	1632	1196	1571	1592	1659	1509	1418	1667	1447	1368	1588	1516	1452
20.6167	1149	1432	1654	1804	1757	1797	1894	1889	1772	1775	1780	1826	1812	1673	1746	1691	1657	1687	1541	1709	1701	1564	1692	1638	1690	1644	1584	1692	1492	1461	1709	1447	1410	1605	1550	1454
24	1174	1408	1674	1854	1754	1809	1892	1894	1777	1772	1825	1837	1802	1658	1724	1711	1694	1693	1577	1724	1694	1601	1689	1667	1718	1613	1563	1692	1491	1460	1704	1492	1421	1596	1555	1439
27.9667	1001	1432	1706	1835	1728	1815	1931	1976	1778	1792	1806	1843	1847	1689	1742	1737	1690	1710	1581	1719	1754	1627	1689	1674	1684	1623	1615	1648	1483	1439	1745	1479	1478	1603	1556	1443
31.9667	1152	1270	1673	1850	1740	1809	1942	1964	1791	1782	1799	1836	1863	1726	1776	1768	1749	1775	1641	1762	1807	1645	1718	1650	1691	1665	1635	1648	1477	1491	1773	1467	1469	1634	1558	1444
38.4333	1178	1285	1693	1817	1758	1829	2004	2048	1858	1858	1804	1806	1957	1774	1826	1848	1816	1847	1708	1798	1846	1673	1789	1701	1776	1674	1686	1722	1476	1495	1820	1487	1443	1683	1644	1457
41.7667	1014	1507	1678	1852	1748	1793	2027	2073	1880	1867	1812	1835	1974	1799	1839	1887	1879	1907	1745	1845	1902	1702	1841	1710	1770	1700	1705	1751	1493	1530	1816	1494	1484	1699	1703	1440
44.6167	1030	1516	1689	1892	1741	1798	2103	2164	1930	1891	1845	1832	2007	1814	1881	1945	1884	1965	1785	1885	1912	1754	1892	1738	1802	1744	1704	1763	1469	1593	1824	1529	1522	1730	1732	1481
48	1054	1550	1728	1892	1778	1809	2133	2175	1962	1897	1857	1856	2079	1878	1892	1956	1904	1981	1825	1904	1952	1818	1895	1764	1790	1781	1700	1799	1483	1647	1893	1540	1529	1765	1776	1504
51.9667	1056	1547	1767	1923	1786	1831	2217	2213	2014	1948	1886	1887	2147	1945	1969	2043	1984	2054	1885	1971	2010	1839	1956	1831	1844	1840	1780	1888	1481	1632	1921	1599	1564	1819	1779	1540
55.9667	1059	1554	1785	1934	1799	1831	2252	2254	2074	1991	1894	1891	2198	1928	2017	2113	2027	2085	1917	2008	2035	1812	1965	1849	1874	1903	1828	1922	1507	1675	1929	1599	1578	1839	1856	1533
62.4333	1074	1592	1788	1980	1849	1867	2374	2365	2119	2034	1908	1960	2310	2038	2108	2110	2122	2120	1966	2028	2190	1902	2039	1891	1928	1923	1826	1949	1533	1714	1998	1651	1621	1900	1901	1539
65.7667	2098	2048	2037	1965	1891	1835	2403	2363	2170	2058	1954	1978	2397	2061	2133	2159	2138	2168	2137	2101	2210	1971	2051	1918	1948	1924	1848	1985	1525	1738	2058	1660	1632	1889	1901	1596
68.6167	2068	2029	2015	1947	1865	1810	2392	2424	2253	2089	1961	1916	2420	2096	2131	2163	2185	2156	2205	2050	2269	1978	2067	1947	1948	1944	1854	2018	1491	1791	2092	1699	1638	1916	1890	1584
72	2096	2018	2004	1957	1854	1858	2449	2433	2257	2101	1978	1953	2410	2129	2129	2172	2173	2156	2245	2097	2235	1999	2100	1924	1969	1939	1870	2020	1504	1816	2085	1702	1678	1953	1975	1559
%INVADED
Elapsed (hr)	no EGF			EGF			MEKi 1nM + MLKi 50nM			p38i 1uM + JNKi 1uM			MEKi + MLKi + p38i 1uM			MEKi + MLKi + p38i 2uM			MEKi + MLKi + JNKi 1uM			MEKi + MLKi + JNKi 2uM			p38i + JNKi + MEKi 1nM			p38i + JNKi + MEKi 2nM			p38i + JNKi + MLKi 50nM			p38i + JNKi + MLKi 100nM
0	0.246914	2.66876	1.14591	1.05783	0.792507	1.19048	0.677966	0.981079	0.416378	1.79164	1.5082	3.10231	1.19225	1.62315	2.51799	1.55039	0.884304	2.05429	1.23574	1.56495	2.10756	0.981132	2.19941	1.71642	3.125	2.94118	2.30947	2.73775	3.26433	3.62438	3.49854	3.10663	4.49339	3.84615	3.67586	4.82143
3.96667	1.18939	2.13392	1.6523	1.45455	0.890208	2.10136	0.434783	1.63376	1.25495	1.63625	1.60099	3.6646	2.25718	2.06943	1.62933	1.8012	1.2934	1.64671	1.7316	0.904033	2.29885	1.07296	1.25962	2.47175	4.64567	4.46364	4.72779	5.03018	5.60472	4.49961	3.63014	4.66035	4.98366	4.95562	3.789	5.71429
7.96667	1.03896	2.39726	1.3935	2.22359	1.25174	2.16882	0.843882	1.2858	1.3191	2.14541	2.45656	4.42375	2.46114	1.90039	2.27716	2.15873	1.74346	1.98083	1.83299	1.16883	2.88401	1.34862	1.7976	3.17568	6.47866	4.86301	6.10329	5.97964	6.65251	6.28743	4.38095	5.14762	6.34184	5.47196	4.49438	7.5
14.4333	1.89166	3.0492	2.27116	2.84718	2.80262	3.24417	1.45577	1.88784	1.84634	2.56849	3.41435	6.28895	2.21066	2.73802	3.61664	2.49703	1.78242	2.52708	3.18514	2.39411	2.5	2.07927	2.91925	4.35606	9.32421	7.35484	7.32505	7.82661	9.74114	8.31572	6.36475	8.48921	8.22123	8.50229	6.10738	9.80534
17.7667	2.57732	2.89456	2.12637	3.19817	3.11398	3.84398	1.99778	2.15401	2.02781	3.21308	3.29545	6.77778	2.38636	3.57782	4.28152	3.12132	2.01958	3.43995	3.81877	3.125	3.11377	2.43278	2.88521	6.12745	10.1171	7.95672	8.4799	8.07715	10.6693	8.88575	7.91842	10.2972	9.06433	8.87909	6.46438	10.5372
20.6167	2.4369	2.5838	2.59976	3.65854	3.358	5.00835	2.48152	2.32927	2.5395	3.60563	3.93258	7.77656	2.81457	4.00478	4.41008	3.25251	2.11225	4.26793	3.89358	4.03745	3.64491	2.36573	3.4279	6.22711	10.5917	9.67153	9.78535	9.10165	11.5952	9.37714	9.65477	11.1956	10.7092	9.96885	7.6129	11.5543
24	2.55537	3.7642	2.50896	4.09924	3.99088	5.14096	2.69556	2.90391	2.98255	4.11964	4.38356	8.60098	2.77469	3.92039	4.87239	3.27294	2.95159	4.72534	4.24857	4.17633	4.13223	2.93567	4.20367	8.03839	11.6997	9.05146	10.3647	9.98818	12.1395	10.3425	10.0352	12.5335	12.1042	11.7794	7.71704	12.2307
27.9667	2.7972	4.32961	2.93083	5.44959	5.49769	7.16253	3.1072	3.79555	3.93701	4.79911	4.87265	9.22409	3.51922	4.26288	5.62572	4.14508	3.43195	5.67251	4.42758	5.29378	5.75827	3.31899	5.26939	8.3632	11.9359	9.9199	11.6409	10.6189	13.2839	11.4663	11.2894	13.3198	12.6522	13.0381	8.80463	13.3056
31.9667	3.73264	8.18898	3.10819	6.54054	5.63218	6.96517	3.03811	4.58248	3.96427	4.82604	5.3363	10.512	3.65003	5.38818	6.19369	4.46833	4.34534	5.69014	5.05789	6.29966	5.42335	4.31611	5.35506	8.30303	13.0692	11.952	11.682	11.4684	14.218	12.7431	13.4236	14.7239	14.0912	13.5251	10.3979	14.5429
38.4333	3.82003	6.77043	3.60307	7.42983	7.50853	8.47458	4.34132	4.98047	5.0592	5.86652	6.37472	12.237	4.24119	6.03157	7.11939	4.97835	4.84581	6.3346	5.79625	7.0634	6.013	5.02092	6.14869	9.17108	14.3581	11.3501	14.5314	13.0662	15.9214	12.9097	14.1758	16.7451	15.0381	15.4486	12.4088	16.9526
41.7667	3.5503	5.10949	3.57569	8.04536	7.83753	9.25823	4.24272	6.07815	4.62766	7.23085	6.78808	12.4796	4.50861	6.83713	8.04785	4.92846	5.00266	6.50236	5.78797	8.13008	6.15142	4.99412	6.5182	9.18129	15.0847	12.4118	14.6628	12.8498	17.3476	12.7451	15.0881	18.0054	17.2507	15.3031	12.4486	17.1528
44.6167	4.56311	5.5409	3.84843	8.87949	7.98392	9.2881	4.3747	6.00739	4.76684	7.40349	6.72087	13.9192	4.43448	7.0011	8.2403	5.86118	5.25478	6.81934	7.0028	7.37401	6.69456	5.58723	7.50529	9.66628	15.5938	11.7546	15.7277	13.2161	16.6099	13.8732	15.1864	18.9666	18.3968	15.896	12.8753	17.7583
48	4.83871	5.48387	4.39815	8.9852	8.83015	10.4478	4.73511	6.48276	5.24975	7.74908	6.83899	14.1164	4.4252	6.49627	7.76956	5.26585	4.62185	6.86522	7.28767	8.35084	7.06967	6.38064	8.12665	10.2041	15.7542	12.9141	14.7059	14.4525	17.3297	13.5398	16.8516	19.6104	18.6396	16.4873	13.795	17.7527
51.9667	4.54545	5.88235	4.64063	8.99636	8.90258	10.8138	4.91655	6.55219	5.56107	7.85421	7.90032	15.2623	5.21658	6.6838	7.97359	5.38424	4.58669	7.15677	7.79841	9.13242	7.66169	5.70962	7.87321	11.1961	16.2148	12.3913	15.6742	13.7712	17.0155	14.2157	17.3347	20.8255	17.8389	17.3172	13.7156	18.3117
55.9667	4.24929	5.72716	4.81793	10.1344	9.33852	10.7045	4.61812	6.74357	5.44841	9.29181	7.81415	15.8646	5.09554	6.69087	8.3292	5.58448	5.27874	7.43405	8.13772	9.71116	8.25553	6.18102	8.14249	11.5197	16.8623	13.1897	15.7549	14.9844	16.722	14.0896	17.7294	20.0125	18.8213	16.5851	15.4095	19.1129
62.4333	4.46927	6.78392	4.69799	10.6061	9.84316	12.0514	4.97051	7.48414	6.08778	9.98033	8.07128	16.4796	5.45455	7.01668	8.77609	6.01896	5.23091	7.5	8.69786	9.91124	8.76712	7.3081	8.92594	12.11	16.39	13.0525	17.5246	15.5977	17.2211	14.4691	18.4184	21.9867	20.6663	18.2632	15.0973	19.6231
65.7667	3.86082	6.39648	4.86009	10.4326	10.5235	11.2807	4.99376	7.44816	6.31336	9.96113	7.26714	16.178	5.59032	6.69578	8.57947	5.37286	5.42563	6.91882	8.42302	9.75726	8.37104	8.21918	8.28864	12.0438	15.7598	12.2141	17.2619	15.5668	17.377	13.8665	17.5899	22.5904	20.2206	18.5283	15.3603	18.3584
68.6167	4.20696	5.96353	5.01241	10.6831	10.6702	10.7182	5.51839	7.71452	6.56902	10.6271	8.00612	16.2839	5.28926	7.87214	9.15063	5.64031	5.72082	7.14286	8.97959	9.85366	8.46188	8.08898	9.09531	12.1212	15.6057	12.9115	16.9364	15.4609	18.1757	14.5729	17.4474	21.7775	21.2454	18.1106	15.5026	19.0657
72	3.95992	6.09514	4.34132	11.395	10.5178	11.8407	5.79829	7.64488	6.11431	10.6616	8.08898	16.7947	5.80913	7.32738	9.39408	6.39963	5.33824	7.46753	8.77506	10.1574	8.72483	7.6038	9.28571	12.9418	14.8299	12.7901	16.738	15.1485	18.8165	15.2533	18.2734	23.6193	22.646	19.0476	16.7595	19.5638
