# Supplementary material for: Limited inhibition of multiple nodes in a driver network blocks metastasis
Source: eLife. 2021 May 11;10:e59696. doi: 10.7554/eLife.59696 (PMC8128439; doi:10.7554/eLife.59696)
Supplement: Figure 6—source data 1. [file elife-59696-fig6-data1.xlsx]

## Sheet: Figure 6D
			p-ERK			p-AKT
	Dose (nM)	log10(Dose)	Experiment #1	Experiment #2	Experiment #3	Experiment #1	Experiment #2	Experiment #3
	0.001	-3	1	1	1	1	1	1
	0.01	-2	1.221	1.49283	0.725757	1.30437	1.34991	0.569551
	0.1	-1	1.01436	1.27336	1.01829	1.26303	1.66599	1.27839
	0.2	-0.69897	0.790358	1.04372	0.993758	1.16483	1.16665	1.09714
	0.4	-0.39794	0.850907	0.923633	0.704167	2.14466	2.32579	1.69167
	0.6	-0.221849	0.528841	0.677474	0.418349	2.27462	2.56297	1.61957
	0.8	-0.09691	0.491188	0.515332	0.38902	3.02787	2.36552	1.7937
	1	0	0.425162	0.489721	0.316484	3.56403	4.49302	3.57809
	10	1	0.0316107	0.0395305	0.0275903	5.6258	8.63473	5.46518
	100	2	0.0015179	0.000602241	0.0029581	5.564	6.5664	5.97293
	NOTE:	The 0.001nM dose represents the DMSO-treated samples (no-drug control) and is set to 0.001 instead of 0 for graphing purposes

## Sheet: Suppl 1B
	Figure 6 - figure supplement 1B
		p-AKT under EGF induction						p-AKT under serum induction
		no EGF	EGF(10ng/ml)	EGF(10ng/ml)	EGF(10ng/ml)			no serum	serum(10%)	serum(10%)	serum(10%)
		DMSO	DMSO	4D-MAPKi (1X)	DMSO			DMSO	DMSO	4D-MAPKi (1X)	DMSO
	Experiment	DMSO	DMSO	DMSO	MEKi (100nM)		Experiment	DMSO	DMSO	DMSO	MEKi (100nM)
	#1	0.269226	1	4.54553	5.564		#1	0.0838976	1	0.711223	1.03911
	#2	0.324799	1	6.42722	6.5664		#2	0.0489948	1	0.622414	1.04307
	#3	0.184107	1	5.84512	5.97293		#3	0.0221919	1	0.465914	0.893701
		p-ERK under EGF induction						p-ERK under serum induction
		no EGF	EGF(10ng/ml)	EGF(10ng/ml)	EGF(10ng/ml)			no serum	serum(10%)	serum(10%)	serum(10%)
		DMSO	DMSO	4D-MAPKi (1X)	DMSO			DMSO	DMSO	4D-MAPKi (1X)	DMSO
	Experiment	DMSO	DMSO	DMSO	MEKi (100nM)		Experiment	DMSO	DMSO	DMSO	MEKi (100nM)
	#1	0.879287	1	0.249732	0.0015179		#1	0.91565	1	0.5924	0.00468305
	#2	0.897394	1	0.364237	0.00060224		#2	0.890459	1	0.677868	0.0054762
	#3	0.862482	1	0.287725	0.0029581		#3	0.726446	1	0.54043	0.00956074
