# Supplementary material for: Limited inhibition of multiple nodes in a driver network blocks metastasis
Source: eLife journal article supplement (doi:10.7554/elife.59696), 2021-05-11
Supplement: supp [file elife_poa_e59696_Figure_5_source_data_1.xlsx]

## Sheet: Figure 5E-G
BM1 cell line								MB436 cell line								LMB cell line
Independent experiment	no ind.	aniso	p38i 0.1uM	p38i 1uM	p38i 10uM	p38i 25uM		Independent experiment	no ind.	aniso	p38i 0.1uM	p38i 1uM	p38i 10uM	p38i 25uM		Independent experiment	no ind.	aniso	p38i 0.1uM	p38i 1uM	p38i 10uM	p38i 25uM
#1	0.267621	1.00116	0.930984	0.623642	0.428505	0.320796		#1	0.452483	1.02428	0.875847	0.79251	0.725434	0.508177		#1	0.550408	1.00149	1.13765	1.17063	1.25698	1.26192
#2	0.505134	1.00623	0.759915	0.70962	0.526342	0.41929		#2	0.472712	1.00673	1.04022	0.812905	0.725589	0.568024		#2	0.38995	1.00383	0.914138	1.00467	1.2972	1.07433
#3	0.366704	1.00714	1.02949	0.722607	0.470685	0.321913		#3	0.559466	1.00811	0.991061	0.826118	0.835862	0.537652		#3	0.313811	1.00792	0.889973	0.984972	1.03957	0.962534
Independent experiment	no ind.	aniso	JNKi 0.1uM	JNKi 1uM	JNKi 10uM	JNKi 25uM		Independent experiment	no ind.	aniso	JNKi 0.1uM	JNKi 1uM	JNKi 10uM	JNKi 25uM		Independent experiment	no ind.	aniso	JNKi 0.1uM	JNKi 1uM	JNKi 10uM	JNKi 25uM
#1	0.290245	1.00644	0.949706	0.881219	0.885352	0.761961		#1	0.633256	1.00888	1.10197	1.13821	0.785457	0.772813		#1	0.358071	1.00165	1.14909	0.964639	0.61586	0.505655
#2	0.275463	1.00476	0.89526	0.933172	0.750236	0.655329		#2	0.442185	1.00117	1.09337	1.12334	0.683288	0.603178		#2	0.439579	1.00777	0.962318	0.968166	0.588144	0.527153
#3	0.307935	1.00149	0.995218	1.07234	1.13852	0.988845		#3	0.437651	1.00717	1.0108	1.03688	0.580602	0.509208		#3	0.54993	1.00336	0.959886	0.963169	0.726213	0.665734
Independent experiment	no ind.	aniso	MEKi 0.1nM	MEKi 1nM	MEKi 10nM	MEKi 100nM		Independent experiment	no ind.	aniso	MEKi 0.1nM	MEKi 1nM	MEKi 10nM	MEKi 100nM		Independent experiment	no ind.	aniso	MEKi 0.1nM	MEKi 1nM	MEKi 10nM	MEKi 100nM
#1	0.270805	1.00368	0.986087	0.694201	0.592269	0.713733		#1	0.550953	1.002	0.988774	1.03033	0.939478	0.865965		#1	0.33256	1.01966	0.934428	0.813441	0.742995	0.699762
#2	0.337588	1.00231	0.870999	0.851328	0.694466	0.604987		#2	0.26542	1.00271	0.843791	0.834018	0.696496	0.831508		#2	0.3475	1.00289	1.2421	1.02167	0.876936	0.662919
#3	0.360864	1.00131	0.957117	0.798248	0.711273	0.732931		#3	0.472912	1.00411	0.964553	0.94899	0.738867	0.659821		#3	0.515307	1.00567	0.774709	0.788868	0.871849	0.683196

## Sheet: Figure 5H-J
BM1 cell line					MB436 cell line					LMB cell line
Independent experiment	no ind.	aniso	4D-MAPKi		Independent experiment	no ind.	aniso	4D-MAPKi		Independent experiment	no ind.	aniso	4D-MAPKi
#1	0.305681	1.00096	0.602434		#1	0.505673	1.02189	0.340838		#1	0.370695	1.01046	0.732944
#2	0.261347	1.00428	0.353157		#2	0.486032	1.00146	0.666546		#2	0.393949	1.00028	0.747889
#3	0.46869	1.01451	0.701392		#3	0.548056	1.00093	0.770822		#3	0.403862	1.00121	0.817819
#4	0.275395	1.00177	0.488487							#4	0.496367	1.00447	0.749569

## Sheet: Suppl 1E
	Figure 5 - figure supplement 1E
		BM1 cells				MB436 cells
	Experiment	Control	4D-MAPKi		Experiment	Control	4D-MAPKi
	#1	1	0.720293		#1	1	0.675443
	#2	1	0.730537		#2	1	0.865277
	#3	1	0.806283		#3	1	0.907339
	#4	1	0.616067
