# Supplementary figures and images for: Limited inhibition of multiple nodes in a driver network blocks metastasis
Source: eLife journal article supplement (doi:10.7554/elife.59696), 2021-05-11

Figure 3 - figure supplement 2

A.

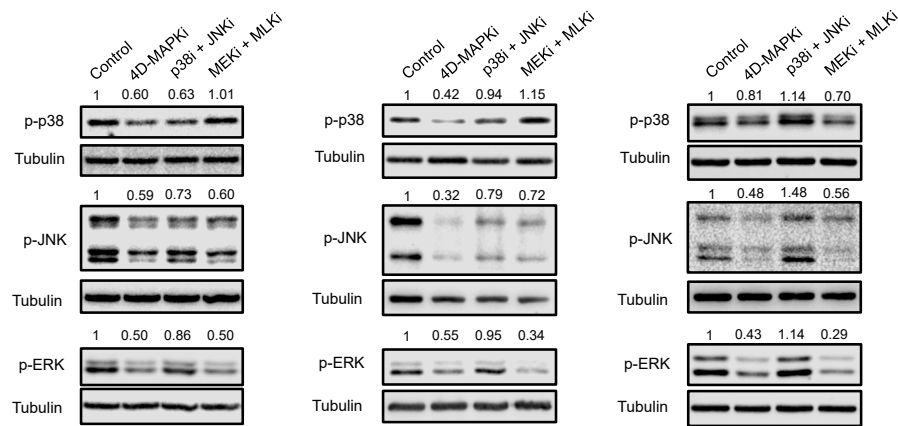

B.

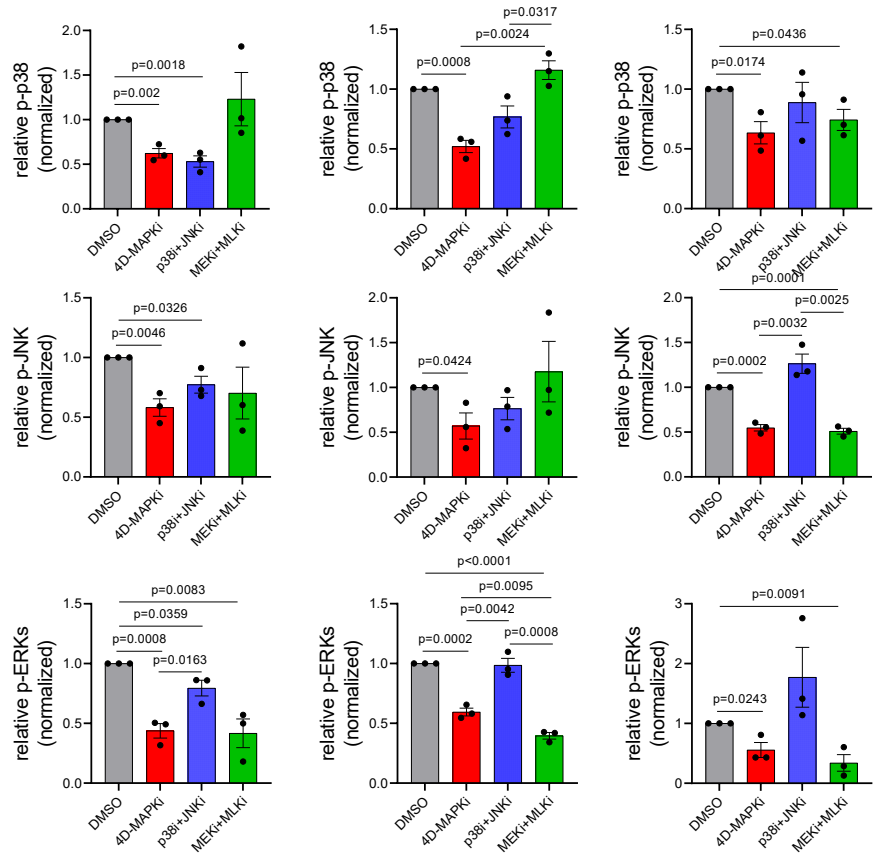

C.

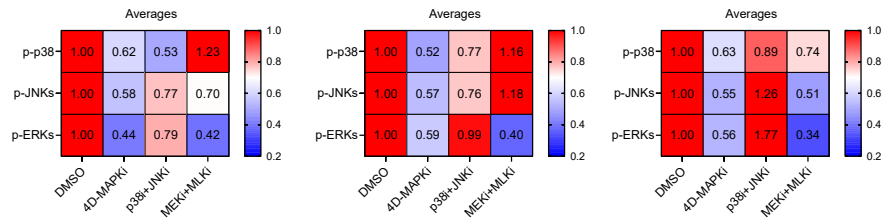

Supplement: supp [file elife-59696-supp-v1.zip]

Figure 4 - figure supplement 1

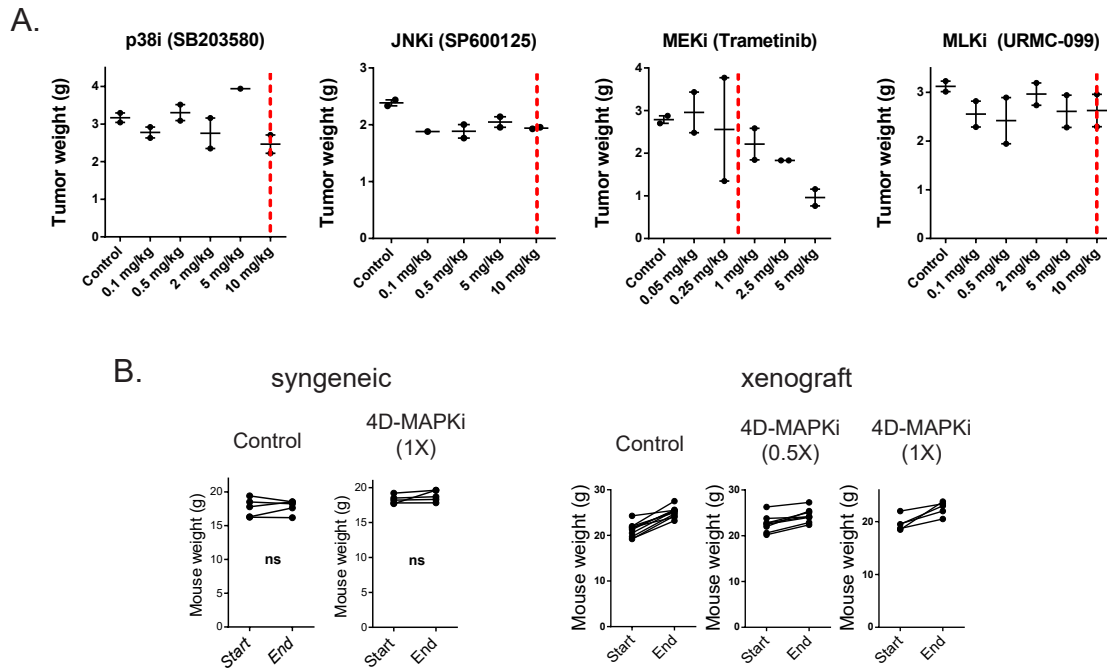

Supplement: supp [file elife-59696-supp-v1.zip]

Figure 1 - figure supplement 2

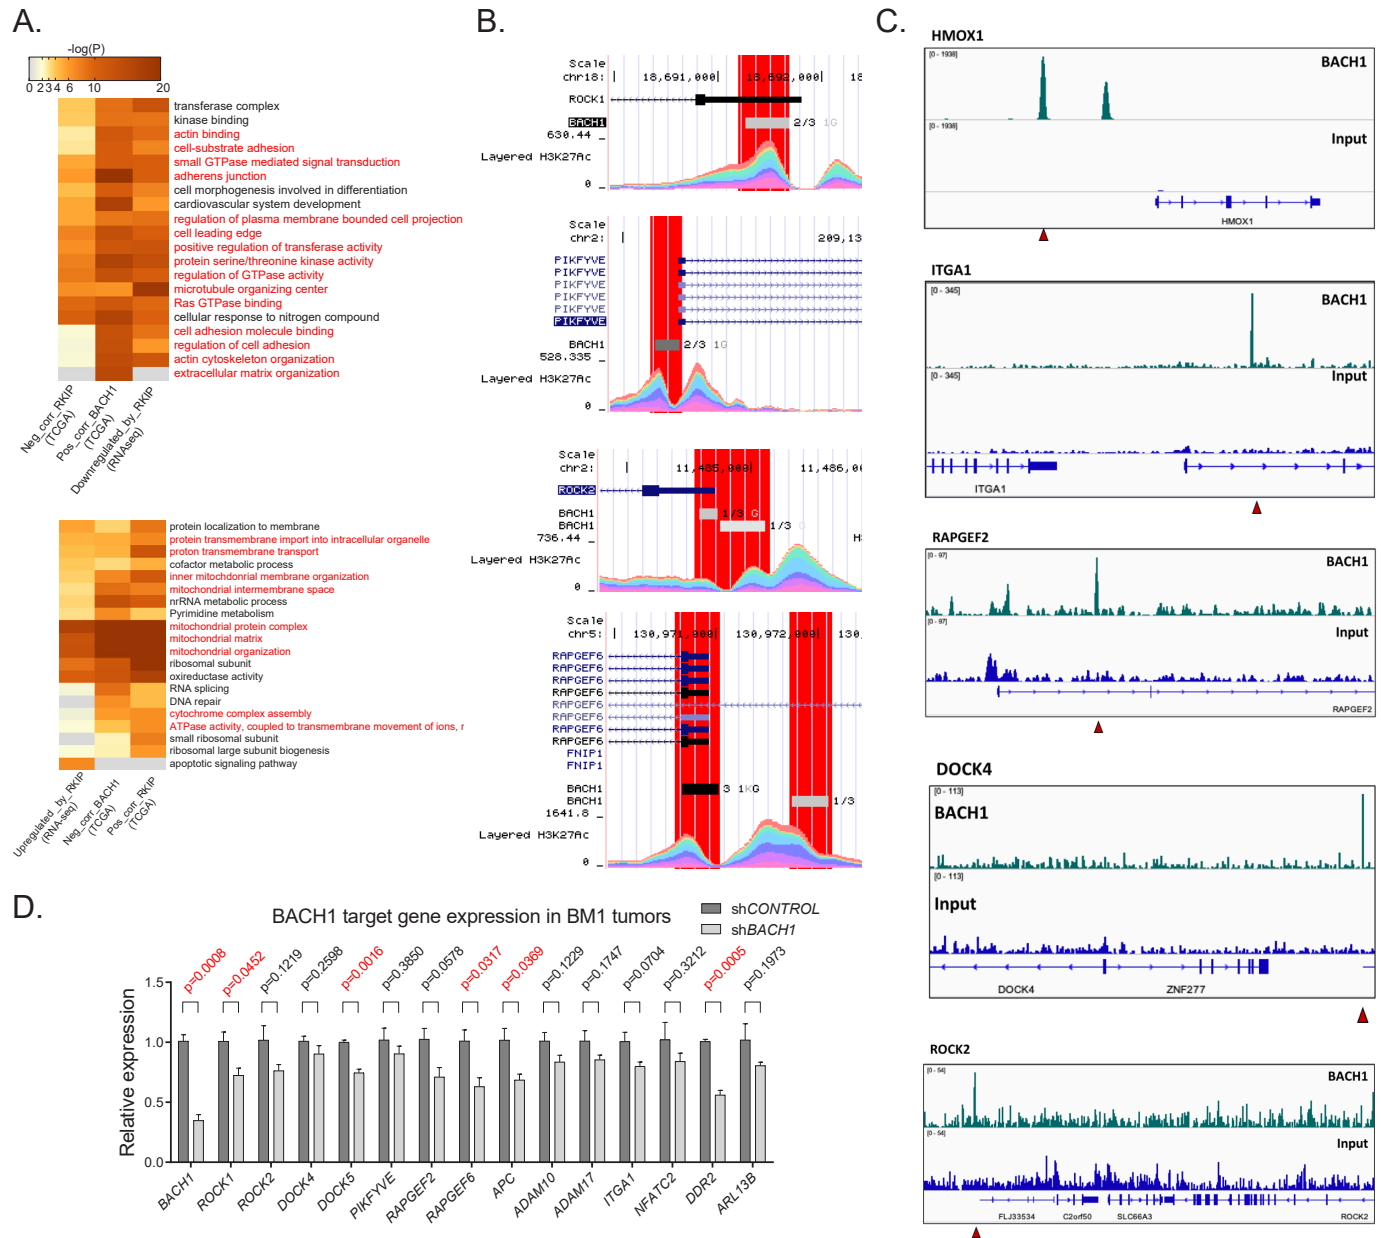

Supplement: supp [file elife-59696-supp-v1.zip]

Figure 6 - figure supplement 1

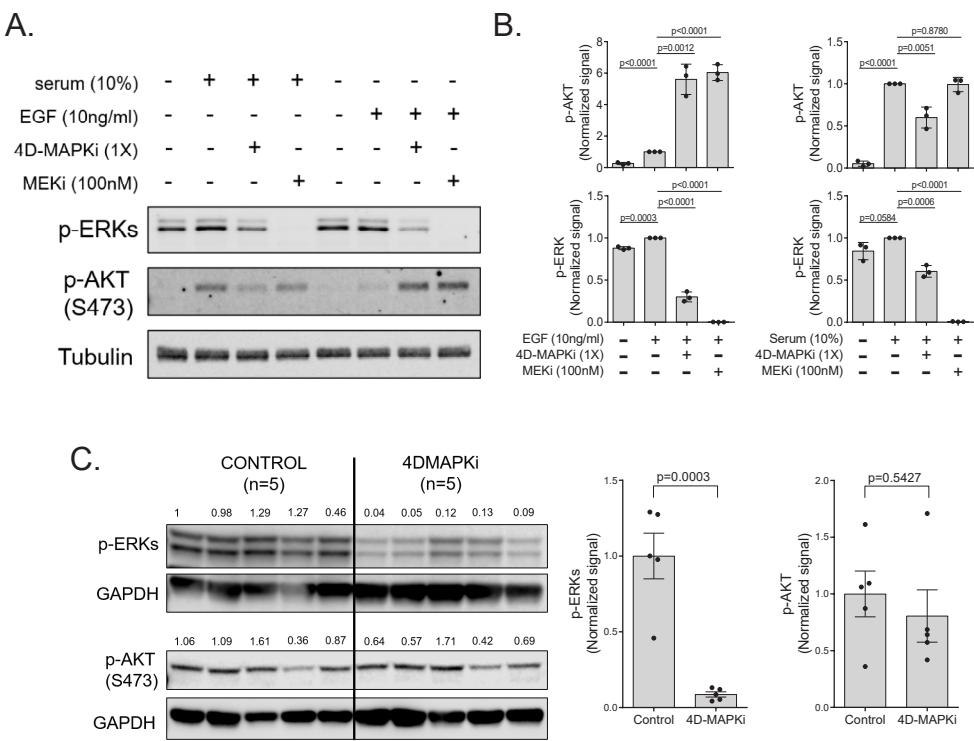

Supplement: supp [file elife-59696-supp-v1.zip]

Figure 1 - figure supplement 1

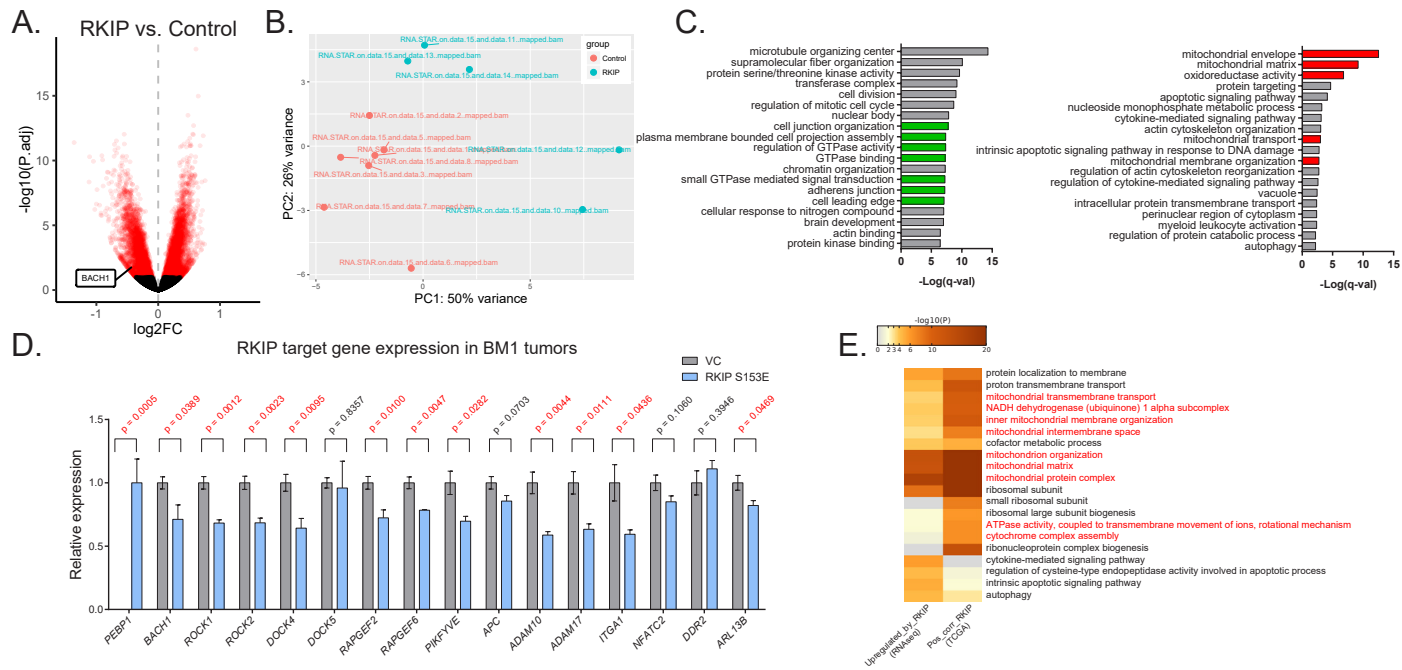

Supplement: supp [file elife-59696-supp-v1.zip]

Figure 5 - figure supplement 1

A.

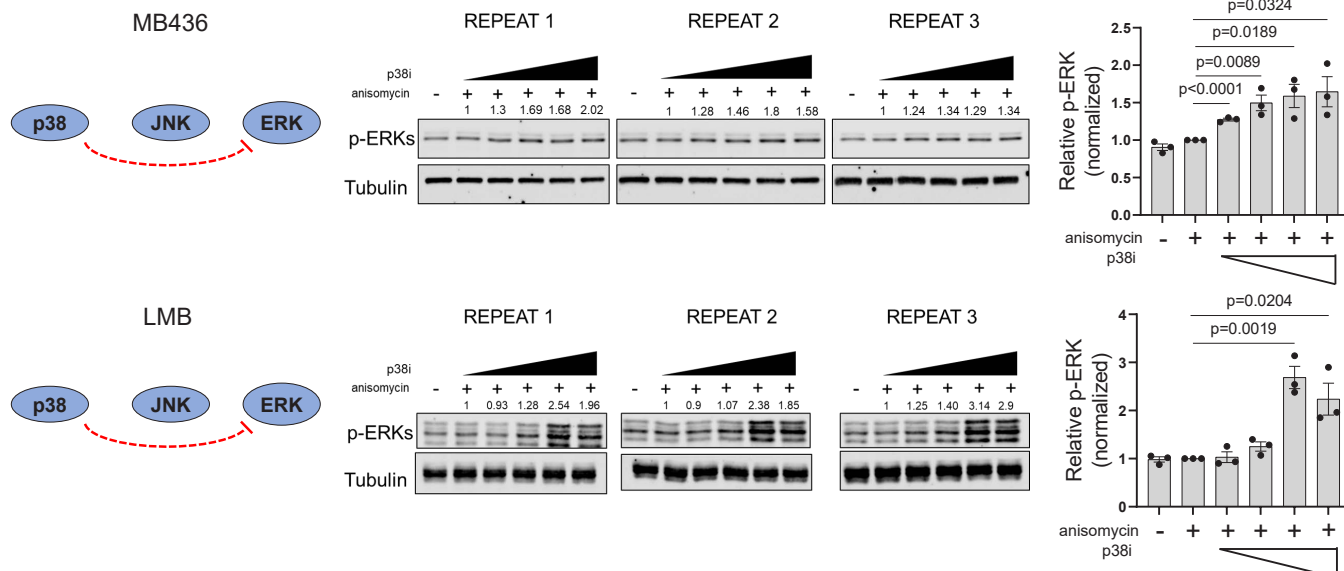

B.

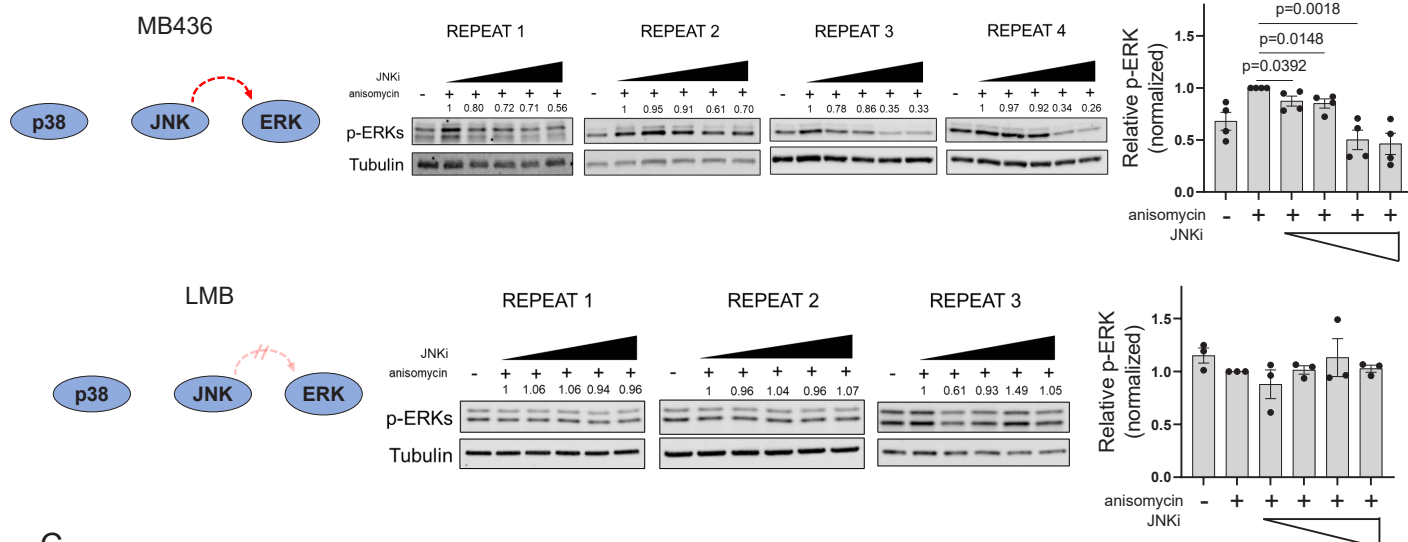

C.

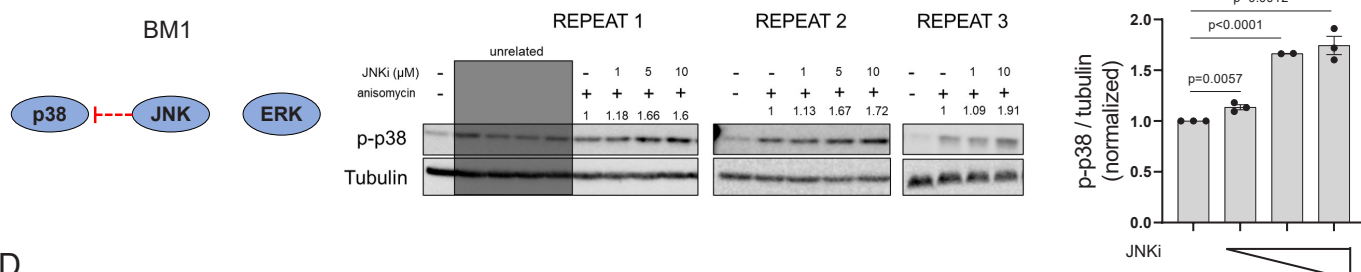

D.

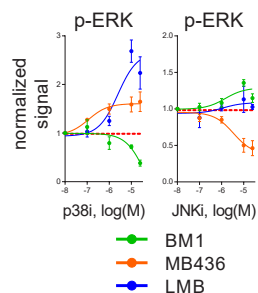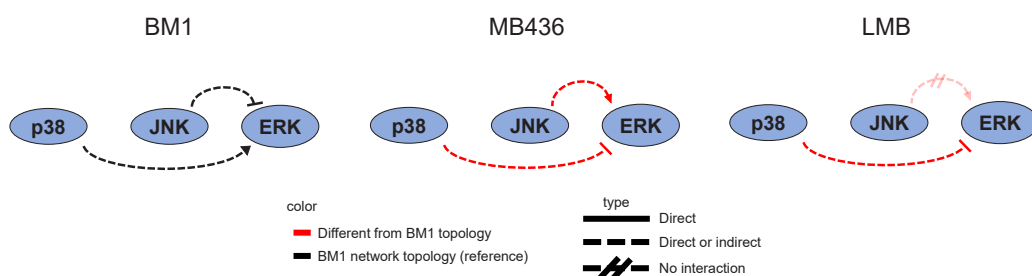

Figure 5 - figure supplement 1 (cont'd)

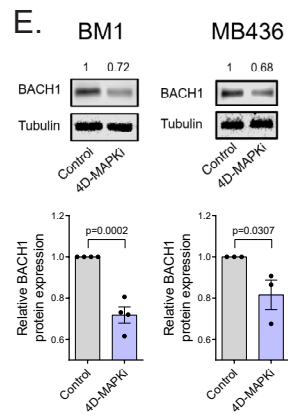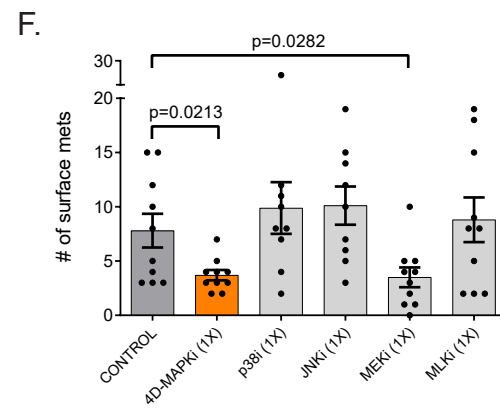

Supplement: supp [file elife-59696-supp-v1.zip]
